# Supplementary material for: Furosine Induced Apoptosis by the Regulation of STAT1/STAT2 and UBA7/UBE2L6 Genes in HepG2 Cells
Source: Int J Mol Sci. 2018 May 31;19(6):1629. doi: 10.3390/ijms19061629 (PMC6032202; doi:10.3390/ijms19061629)
Supplement: Supplementary file 1 [file ijms-19-01629-s001.xlsx]

## Sheet: All the genes
id	Symbol	GC-1_fpkm	GC-2_fpkm	GC-3_fpkm	G100-1_fpkm	G100-2_fpkm	G100-3_fpkm	G200-1_fpkm	G200-2_fpkm	G200-3_fpkm	p-100/CK	p-200/CK
ENSG00000141646	SMAD4	38.3	37.18	34.08	33.16	35.26	34.82	35.06	33.99	30.75	0.170477	7.92399e-05
ENSG00000171703	TCEA2	18.24	20.65	18.53	22.43	20.28	22.05	22.84	24.92	22.97	0.113685	0.000230428
ENSG00000164088	PPM1M	6.23	5.71	5.62	5.79	6.29	5.69	7.18	6.69	6.52	0.417112	0.000305629
ENSG00000161057	PSMC2	59.95	59.73	55.57	58.2	63.68	53.5	56.8	56.72	52.72	0.492166	0.000415839
ENSG00000179774	ATOH7	0.38	0.45	0.39	0.32	0.21	0.18	0.11	0.17	0.14	0.0463036	0.000545979
ENSG00000166780	C16orf45	7.03	5.92	6.09	8.09	7.67	6.77	7.83	6.65	6.91	0.0327187	0.000605508
ENSG00000204217	BMPR2	1.36	1.84	1.48	1.7	2.03	2.52	1.92	2.4	1.98	0.0918924	0.000684463
ENSG00000130768	SMPDL3B	2.07	1.75	1.9	1.46	2.54	1.68	2.48	2.21	2.36	0.488702	0.000705159
ENSG00000163964	PIGX	21.83	23.76	17.81	22.26	17.66	18.73	19.36	21.51	15.64	0.278264	0.000760813
ENSG00000140465	CYP1A1	2.51	2.3	2.63	4.13	4.17	3.06	4.09	3.71	4.24	0.0493788	0.000822635
ENSG00000186660	ZFP91	34.94	34.48	31.95	35.05	32.32	35.82	32.78	32.44	30.08	0.381492	0.000862199
ENSG00000178202	KDELC2	8.53	8.77	6.96	9.95	9.09	9.59	9	9.18	7.38	0.0803281	0.000914644
ENSG00000132879	FBXO44	9.78	10.47	11.44	12.35	11.56	10.13	11.39	11.92	13.12	0.280008	0.000925427
ENSG00000165138	ANKS6	11.44	8.44	11.5	12.85	12.05	7.88	10.39	7.25	10.29	0.423793	0.000955039
ENSG00000165895	ARHGAP42	1.02	1.51	1.04	0.96	1.22	1.06	0.62	1.1	0.58	0.179051	0.00095824
ENSG00000077152	UBE2T	102.89	108.93	100.71	101.8	95.32	89.48	95.7	101.06	92.33	0.0765873	0.000970261
ENSG00000072135	PTPN18	15.76	15.82	14.05	15.63	14.63	14.31	17.12	16.99	15.28	0.250206	0.000997882
ENSG00000182149	IST1	141.51	142.79	140.05	133.95	137.28	129.56	134.74	135.19	132.17	0.0161152	0.00100662
ENSG00000160712	IL6R	2.5	2.9	2.71	4.56	2.43	2.42	2.02	2.46	2.3	0.32404	0.00104258
ENSG00000038382	TRIO	20.63	19.65	22.27	19.61	20.16	20.25	18.14	17.26	20.14	0.185151	0.00105081
ENSG00000182179	UBA7	2.99	1.82	1.85	8.85	7.8	8.53	18.14	11.47	16.66	0.000855549	0.00884095
ENSG00000066651	TRMT11	7.6	8.16	10	7.95	8.16	10.82	9.84	10.07	11.99	0.121175	0.0011749
ENSG00000047621	C12orf4	6.3	6.19	5.83	7.27	7.26	6.66	4.28	4.01	3.44	0.0026258	0.0011851
ENSG00000021574	SPAST	3	3.63	2.88	3.95	3.22	2.72	2.29	2.9	2.26	0.395227	0.00120919
ENSG00000100100	PIK3IP1	0.7	0.67	0.55	0.97	1	0.37	0.51	0.49	0.39	0.238032	0.00124136
ENSG00000139218	SCAF11	15.5	20.29	13.56	19.51	18.7	21.13	17.23	21.86	15.43	0.169009	0.00125977
ENSG00000164342	TLR3	0.22	0.37	0.1	0.44	0.52	0.69	0.56	0.69	0.48	0.071872	0.00128937
ENSG00000140481	CCDC33	0.49	0.52	0.81	0.2	0.55	0.51	0.68	0.68	0.98	0.113563	0.00128937
ENSG00000178127	NDUFV2	118.65	127.2	117.67	121.63	120.32	117.91	112.81	121.11	112.57	0.359155	0.00136515
ENSG00000168961	LGALS9	12.64	6.32	5.5	14.64	19.51	16.71	23.7	19.48	18.49	0.0626454	0.00146757
ENSG00000149798	CDC42EP2	18.54	17.49	17.69	18.97	18.63	17.71	21.38	19.85	20.41	0.123333	0.00148555
ENSG00000137513	NARS2	32.65	34.39	33.74	30.25	34.23	29.37	30.15	31.52	30.71	0.0989527	0.00156364
ENSG00000180822	PSMG4	26.34	30	27.33	29.35	26.68	28.39	23.16	26.25	23.52	0.452985	0.00156483
ENSG00000185133	INPP5J	1.48	1.55	1.19	1.68	1.05	1.35	1.91	2	1.71	0.42806	0.00170047
ENSG00000205413	SAMD9	6.63	7.93	4.37	6.87	13.46	15.08	11.53	13.43	10.38	0.105388	0.00171071
ENSG00000214530	STARD10	13.93	12.89	12.01	12.7	11.67	12.42	12.4	11.38	10.75	0.169211	0.00182608
ENSG00000165724	ZMYND19	55.18	51.67	58.45	52.39	50.74	47.11	46.72	44.81	50.9	0.128904	0.00183683
ENSG00000166863	TAC3	1.11	1.23	0.96	1.16	0.74	1.03	0.78	0.92	0.58	0.285304	0.00186381
ENSG00000136986	DERL1	49.99	45.99	44.35	42.84	41.18	43.62	45.02	40.34	39.77	0.0764108	0.00189298
ENSG00000142677	IL22RA1	0.26	0.2	0.46	0.53	0.34	0.53	0.51	0.48	0.77	0.0560121	0.00190235
ENSG00000215695	RSC1A1	1.62	2.64	1.67	2.46	1.98	1.45	1.25	2.26	1.36	0.489413	0.00190258
ENSG00000123609	NMI	18.14	13.2	8.32	17.02	23.59	20.69	25.72	22.62	17.01	0.114228	0.00193971
ENSG00000083535	PIBF1	2.22	3.08	3.86	1.8	3.69	4.34	2.83	3.59	4.49	0.280849	0.00201228
ENSG00000126106	TMEM53	2.59	3.04	2.39	3.6	2.71	2.86	3.07	3.63	2.97	0.21427	0.00202618
ENSG00000171401	KRT13	0.42	0.56	0.44	0.78	0.81	0.89	0.91	1	0.83	0.0128792	0.00213841
ENSG00000203546	RP11-176H8.1	0.84	0.56	0.83	0.11	0.42	0.27	0.33	0.14	0.31	0.0564308	0.00215014
ENSG00000099889	ARVCF	2.14	2.48	3.45	1.94	1.33	1.82	1.13	1.22	2.24	0.0709133	0.00215356
ENSG00000177853	ZNF518A	0.7	0.84	0.63	0.81	1.56	1.66	1.07	1.23	0.94	0.0743696	0.00225559
ENSG00000026103	FAS	6.24	7.2	4.83	6.82	6.3	8.08	7.16	8.36	5.92	0.252817	0.00225849
ENSG00000148690	FRA10AC1	4.29	5.16	3.62	4.96	5.49	5.33	5.62	6.83	5.06	0.0807525	0.00227468
ENSG00000130202	NECTIN2	40.32	42.41	42.52	39.72	43.48	39.05	39.6	41.84	41.9	0.264697	0.00238139
ENSG00000144152	FBLN7	13.3	13.42	14.68	12.39	11.91	10.94	11.3	11.73	13.09	0.0699238	0.0024409
ENSG00000180834	MAP6D1	0.48	0.5	0.46	0.35	0.48	0.67	0.71	0.68	0.67	0.4301	0.00245321
ENSG00000143816	WNT9A	2.76	2.75	3.22	3.17	2.45	2.3	2.61	2.6	3.1	0.277509	0.00253166
ENSG00000137409	MTCH1	130.51	130.03	135.66	124.56	117.81	121.58	120.23	118.19	126.41	0.0242787	0.00257194
ENSG00000005073	HOXA11	16.79	17.59	16.78	19.99	20.65	19.39	18.17	19.23	18.56	0.00180205	0.0026609
ENSG00000170584	NUDCD2	14.22	16.7	14.65	19.2	15.54	14.13	17.18	19.96	17.15	0.314653	0.00286582
ENSG00000204267	TAP2	30.72	28.82	29.5	30.66	35.75	29.58	37.07	37.01	36.39	0.210522	0.00289639
ENSG00000130304	SLC27A1	2.01	1.82	1.97	2.21	1.36	1.45	1.41	1.07	1.37	0.188349	0.00293258
ENSG00000122140	MRPS2	58.68	56.75	60.01	60.32	58.19	54.34	59.92	58.33	61.29	0.376938	0.0030533
ENSG00000137868	STRA6	8.81	8.26	12.76	12.41	11.5	11.61	12.77	11.26	16.26	0.170033	0.00313089
ENSG00000127995	CASD1	2.65	2.42	3.38	2.4	2.74	3.4	3.48	3.05	4.15	0.436098	0.00314725
ENSG00000185163	DDX51	9.24	9.74	8.37	8.19	9.55	10.58	11.24	12.27	10.99	0.3859	0.00326089
ENSG00000188735	TMEM120B	7.46	8.02	7.71	8.69	7.85	7.06	5.55	6.25	6.27	0.415552	0.00329919
ENSG00000067606	PRKCZ	9.36	7.84	8.81	7.85	8.36	6.75	11.28	9.74	11.23	0.162213	0.00331064
ENSG00000101298	SNPH	0.2	0.21	0.23	0.37	0.3	0.29	0.27	0.27	0.31	0.0415454	0.00336704
ENSG00000136159	NUDT15	16.57	16.49	15.42	19.81	17.29	17.58	18.54	17.97	17.11	0.0497761	0.00339625
ENSG00000185880	TRIM69	32.07	27.2	19.27	32.96	35.75	36.83	47.24	47.46	36.85	0.101342	0.00342514
ENSG00000172183	ISG20	32.76	27	23.59	38.72	39.71	37.53	44.74	40.77	39.59	0.0241657	0.00345448
ENSG00000120832	MTERF2	4.11	6.25	4.99	3.74	3.98	3.45	3.11	4.91	3.79	0.0640551	0.00345894
ENSG00000124788	ATXN1	2.17	2.5	2.69	2.45	2.4	2.61	1.76	2.19	2.29	0.406243	0.00358823
ENSG00000135525	MAP7	36.68	34.5	33.41	30.66	33.34	31.92	31.56	29.54	26.96	0.103308	0.00363315
ENSG00000181830	SLC35C1	12.1	12.04	11.64	11.55	12.43	11.9	13.89	13.59	13.73	0.460052	0.00368285
ENSG00000154265	ABCA5	4.7	6.45	4.19	4.69	5.35	6.68	6.3	8.6	6	0.353656	0.00369644
ENSG00000188763	FZD9	0.5	0.33	0.34	0.43	0.34	0.18	0.57	0.4	0.43	0.136946	0.00373837
ENSG00000164684	ZNF704	2.28	1.6	1.87	2.61	2.38	2.25	2.99	2.56	2.76	0.036641	0.00376413
ENSG00000137331	IER3	174.77	191.16	194.19	220.79	187.26	201.64	213.97	219.86	228.58	0.194121	0.00391414
ENSG00000127081	ZNF484	0.6	0.63	0.5	0.73	0.43	0.77	0.4	0.43	0.35	0.339749	0.0040817
ENSG00000198270	TMEM116	17.95	17.24	18.23	16.17	16.72	16.25	19.36	18.61	19.27	0.044553	0.00418536
ENSG00000186111	PIP5K1C	7.05	6.63	6.51	7.09	7.47	7.17	8.03	7.34	7.35	0.0841421	0.00421883
ENSG00000130810	PPAN	28.53	26.82	26.99	22.15	27.46	27.05	27.51	25.43	25.65	0.244292	0.00424401
ENSG00000163536	SERPINI1	7.79	8.63	8.22	8.08	8.02	7.62	5.52	6.87	6.51	0.206033	0.00431557
ENSG00000187866	FAM122A	6.11	5.89	5.68	6.6	5.98	6.24	6.48	6.31	5.98	0.0609405	0.00452498
ENSG00000186812	ZNF397	4.17	3.05	4.56	4.34	3.25	3.16	3.41	2.29	4	0.291255	0.00455964
ENSG00000171943	SRGAP2C	7.47	8.07	6.76	5.62	7.5	7.86	6.33	6.81	5.86	0.328858	0.00456482
ENSG00000136867	SLC31A2	2	1.91	2.38	1.92	2.41	2.13	2.38	2.38	2.72	0.413098	0.00463086
XLOC_022805	TCONS_00150005	1.67	2.9	1.23	3.91	4.7	2.97	4.21	4.72	3.33	0.00331324	0.0046688
ENSG00000149591	TAGLN	1.59	1.93	1.45	2.76	2.16	2.05	1.87	2.19	1.65	0.0674763	0.00468141
ENSG00000126953	TIMM8A	15.95	15.58	17.14	14.15	13.66	13.65	13.02	13.33	13.98	0.0238387	0.00475967
ENSG00000145901	TNIP1	37.34	36.86	37.81	40.78	40.43	43.48	41.22	39.62	41.01	0.0140046	0.00486077
ENSG00000107201	DDX58	19.71	17.69	6.99	22.11	27.37	30.34	29.3	28.31	20.32	0.0971839	0.00490335
ENSG00000086544	ITPKC	7.19	7.81	7	6.2	7.34	6.85	6.82	7.39	6.48	0.079822	0.00502208
ENSG00000198331	HYLS1	0.45	0.5	0.63	0.75	0.65	0.47	0.66	0.8	0.9	0.274726	0.00509846
ENSG00000171791	BCL2	2.28	2.32	2.64	2.27	2.06	2.1	1.83	1.82	2.01	0.109909	0.00510811
ENSG00000196730	DAPK1	16.79	15.71	13.01	19.7	16.06	20.99	21.23	21.79	19.23	0.118325	0.00516252
ENSG00000115657	ABCB6	11.54	9.93	11.76	11.25	9.63	11.09	12.69	10.85	13.08	0.0391751	0.00517856
ENSG00000160685	ZBTB7B	66.97	77.34	64.07	67.85	72.82	65.91	78.39	86.88	77.76	0.395215	0.0053093
ENSG00000119636	BBOF1	2.4	2.72	2.63	1.53	2.34	2.18	1.9	2.01	1.94	0.0328965	0.00548996
ENSG00000143514	TP53BP2	10.08	8.56	9.83	8.41	8.66	9.28	9.49	7.76	9.24	0.152491	0.00553127
ENSG00000117228	GBP1	0.98	1.05	0.38	1.35	1.6	1.55	1.85	1.76	1.41	0.0513368	0.00554346
ENSG00000185115	NSMCE3	4.17	3.58	3.44	4.37	4.07	4.33	4.46	4	3.79	0.0595176	0.00555743
ENSG00000168310	IRF2	8.31	6.42	5.43	7.81	8.92	12.04	10.86	9.26	9.05	0.149172	0.00556413
ENSG00000123353	ORMDL2	37.18	35.96	37.13	33.49	34.83	30.34	34.75	34.29	35.01	0.0708719	0.00556751
ENSG00000121454	LHX4	3.94	3.55	4.01	3.65	3.2	3.34	3.33	3.11	3.55	0.0329167	0.0055846
XLOC_007732	TCONS_00048786	1.14	1.07	1.19	1.25	0.58	0.69	0.36	0.49	0.35	0.141529	0.00564669
ENSG00000169991	IFFO2	3.08	3.75	3.21	2.36	2.27	2.2	2.51	3.1	2.39	0.0201295	0.00577358
ENSG00000196526	AFAP1	43.5	42.01	43.87	43.6	40.62	43.83	41.39	38.99	40.92	0.224611	0.0057896
ENSG00000089597	GANAB	227.68	213.81	244.16	202.78	215.59	214.49	212.08	201.53	226.15	0.106983	0.0057935
ENSG00000006831	ADIPOR2	34.3	34.41	34.16	32.3	33.24	33.81	31.31	31.06	29.87	0.0663788	0.00587548
ENSG00000111012	CYP27B1	1.5	1.17	1.16	1.29	2.15	1.43	2.31	1.74	1.98	0.210763	0.00609538
XLOC_023606	TCONS_00154580	1.48	1.59	1.74	1.47	1.13	1.87	1.33	1.46	1.55	0.294718	0.0062197
ENSG00000113119	TMCO6	5.37	7.09	5.58	6.42	6.34	4.9	6.72	8.21	6.49	0.424791	0.00624039
ENSG00000067064	IDI1	20.9	27.85	23.29	21.65	19.88	21.87	15.84	20.37	16.35	0.193223	0.00625936
ENSG00000115267	IFIH1	22.58	21.66	10.92	24.86	33.72	34.09	32.91	31.25	24.63	0.0870258	0.00627828
ENSG00000184489	PTP4A3	5.24	5.6	5.45	7.7	5.98	5.25	6.51	7.36	6.72	0.194817	0.00636891
ENSG00000118816	CCNI	58.57	57.46	57.02	71	61.8	62.68	61.39	60.55	61.09	0.0481818	0.00639088
ENSG00000175130	MARCKSL1	48.49	46.08	48.26	48.13	53.98	52.01	53.8	53.65	53.9	0.127623	0.00639252
ENSG00000170779	CDCA4	35.55	36.86	38.46	41.44	35.61	37.1	36.94	38.19	39.4	0.34661	0.00655388
ENSG00000160688	FLAD1	45.89	44.47	47.3	38.29	38.72	35.43	42.5	39.64	42.3	0.0217299	0.00658313
ENSG00000185467	KPNA7	0.65	0.71	0.33	1.02	0.83	1.25	0.92	0.93	0.51	0.0924992	0.00665896
ENSG00000148672	GLUD1	56.03	60.63	57.23	62.19	57.42	57.23	54.73	59.62	56.35	0.377402	0.00667875
ENSG00000122643	NT5C3A	33.13	30.07	24.59	37.75	46.04	47.09	45.58	45.02	34.48	0.0553624	0.00676524
ENSG00000074855	ANO8	9.47	9.88	11.27	11.06	9.78	8.65	8.75	8.82	10.46	0.393618	0.00679817
ENSG00000100068	LRP5L	1.21	0.92	0.94	1.08	0.75	0.79	0.85	0.65	0.53	0.00293688	0.00683754
ENSG00000103037	SETD6	18.6	17.67	20.5	15.75	14.68	13.67	14.59	14.98	16.64	0.0417768	0.00688091
ENSG00000152894	PTPRK	18.96	19.81	16.44	20.27	20.9	22.18	21.06	22.32	19.6	0.107555	0.00695071
ENSG00000181418	DDN	0.46	0.57	0.34	0.56	0.42	0.49	0.32	0.36	0.14	0.376909	0.00695939
ENSG00000128965	CHAC1	58.65	56.65	61.86	47.1	49.91	49.81	54.64	53.54	57.12	0.0134465	0.0069609
ENSG00000110429	FBXO3	9.32	10.06	9.7	10.9	11.81	10.29	6.74	6.13	6.4	0.0344011	0.00696396
ENSG00000100038	TOP3B	8.17	10.02	10.49	8.65	7.84	9.4	7.45	9.09	9.39	0.17578	0.00703545
ENSG00000159176	CSRP1	364.29	373.91	341.66	328.26	308.29	311.01	319.1	323.63	308.69	0.0278697	0.00704469
ENSG00000179761	PIPOX	0.88	0.64	1.34	1.98	0.53	0.88	0.53	0.32	0.87	0.372222	0.00711659
ENSG00000102543	CDADC1	7.59	7.67	6.6	5.21	6.36	6.17	6.35	6.74	5.76	0.0675951	0.00713454
ENSG00000080345	RIF1	3.14	3.08	3.76	2.06	5.64	5	4.09	4.5	4.85	0.241935	0.00714051
ENSG00000164128	NPY1R	0.7	0.58	0.7	1.21	0.43	0.53	0.29	0.28	0.24	0.401727	0.00718382
ENSG00000041353	RAB27B	2.22	4.17	2.48	3.3	2.9	4.18	3.3	4.89	3.53	0.316928	0.00720944
ENSG00000109762	SNX25	4.66	4.57	4.76	4.78	3.52	4.42	3.95	3.74	3.69	0.169768	0.00723833
ENSG00000272047	GTF2H5	2.72	3.32	2.63	3.05	3.12	3.35	2.92	3.61	2.84	0.199622	0.00728655
ENSG00000109674	NEIL3	5.29	5.7	3.97	6.2	5.96	6.37	5.91	6.23	4.77	0.100533	0.0072929
XLOC_008115	TCONS_00051005	0.72	0.57	0.47	0.18	0.13	0.21	0.51	0.34	0.16	0.0185546	0.00730347
ENSG00000165533	TTC8	13.06	14.7	16.83	14.65	12.32	11.33	9.47	9.74	11.31	0.207144	0.00730691
ENSG00000165494	PCF11	9.78	9.09	9.66	8.51	10.86	11.2	9.54	8.72	9.36	0.279261	0.00749615
ENSG00000111912	NCOA7	85.37	96.26	66.2	99.77	97.48	107.61	99.52	111.67	87.16	0.124637	0.0075412
ENSG00000138400	MDH1B	0.2	0.18	0.2	0.69	0.25	0.21	0.38	0.34	0.44	0.167637	0.00755418
ENSG00000089505	CMTM1	0.91	0.46	0.64	0.41	0.63	0.79	1.15	0.82	1	0.405352	0.00763404
ENSG00000171421	MRPL36	154.84	147.18	156.19	148.16	139.48	137.65	141.9	136.9	140.26	0.0508382	0.00764036
ENSG00000133313	CNDP2	93.27	79.19	82.88	90.89	98.71	92.95	108.14	102.34	101.93	0.144464	0.00771171
ENSG00000203852	HIST2H3A	1.16	1.26	1.29	1.64	1.57	1.7	1.5	1.74	1.62	0.00743498	0.00779134
ENSG00000203811	HIST2H3C	1.16	1.26	1.29	1.64	1.57	1.7	1.5	1.74	1.62	0.00743498	0.00779134
ENSG00000005436	GCFC2	11.96	12.74	10.94	10.27	10.51	10.92	9.8	9.5	8.55	0.093518	0.00781262
ENSG00000115935	WIPF1	8.87	10.22	9.32	9.64	9.35	7.59	7.83	9.25	7.88	0.246498	0.00791152
ENSG00000144596	GRIP2	1.46	0.61	0.2	0.56	1.48	1.29	2.69	2.1	2.11	0.315645	0.00803997
ENSG00000111581	NUP107	33.12	34.22	25.19	27.84	34.09	33.88	29.66	31.89	22.71	0.406889	0.00806114
ENSG00000204174	NPY4R	10.36	10.59	11.68	12.44	9.36	10	8.65	8.24	10.12	0.418588	0.00815614
ENSG00000168813	ZNF507	3.98	3.88	3.62	3.86	3.97	4.14	3.52	3.59	3.22	0.238636	0.00822358
ENSG00000132002	DNAJB1	116.32	113.91	124.21	109.15	106.74	100.75	109.04	104.61	112.7	0.0730455	0.00829818
ENSG00000115339	GALNT3	1	0.54	0.88	1.07	0.73	0.92	1.47	0.96	1.52	0.0804093	0.00831048
ENSG00000184371	CSF1	1.76	1.24	0.8	1.9	1.38	1.91	2.35	2.17	1.66	0.144123	0.00832323
ENSG00000172932	ANKRD13D	8.65	7.24	8.09	7.24	6.86	5.6	7.2	6.05	7.18	0.0719812	0.0084611
ENSG00000141994	DUS3L	20.16	22.29	10.68	19.74	18.33	18.13	26.78	32.03	21.14	0.39509	0.0084682
ENSG00000256500	RP11-73M18.2	7.6	7.54	5.95	5.95	9.66	9.76	9.91	10.03	9.44	0.234971	0.00859402
ENSG00000140563	MCTP2	7.95	9.47	8.39	8.58	7.86	8.94	6.78	8.3	6.68	0.43158	0.00865866
ENSG00000085998	POMGNT1	25.06	25.78	25.3	22.94	24.27	24.24	22.89	24.36	23.08	0.0182509	0.00869228
ENSG00000135776	ABCB10	5.07	5.45	5.5	5.3	4.61	5.42	4.72	4.89	4.99	0.272251	0.00871816
XLOC_004902	TCONS_00028630	1.47	1.37	1.73	0.69	0.97	0.83	1.15	0.87	1.36	0.0220701	0.00890136
ENSG00000130396	AFDN	6.58	6.26	5.99	5.19	5.25	7.14	4.41	4.92	4.08	0.325471	0.00895643
ENSG00000112096	SOD2	91.41	93.63	83.78	103.69	107.24	132.82	106.61	112.59	95.52	0.0868437	0.00903307
ENSG00000112308	C6orf62	55.63	49.47	44.63	61.67	64.05	66.77	66.01	59.11	59.34	0.0460008	0.00907417
ENSG00000163882	POLR2H	116.26	111.42	116.8	103.99	105.01	102.97	110.5	107.67	112.71	0.0204012	0.00913031
ENSG00000061938	TNK2	14.76	15.51	17.25	16.69	18.21	16.34	17.01	17.33	20.17	0.187952	0.0091752
ENSG00000135334	AKIRIN2	18.27	16.79	19.16	18.25	19.73	17.1	20.68	20.51	21.81	0.430845	0.00920455
XLOC_008163	TCONS_00051293	8.96	8.18	7.17	9.56	6.8	6.29	7.48	7.09	5.39	0.225105	0.00922687
ENSG00000047597	XK	3.42	3.45	3.4	3.43	3.88	3.25	2.84	3	3.04	0.31622	0.00923513
ENSG00000110841	PPFIBP1	16.72	16.89	14.61	16.55	15.19	19.12	18.07	17.73	15.89	0.341978	0.00925808
ENSG00000104957	CCDC130	18.03	16.83	18.6	16.55	13.03	17.41	19.45	18.98	20.89	0.0603398	0.00926849
ENSG00000198001	IRAK4	4.49	4.42	3.46	4.14	3.97	4.63	3.95	3.95	3.13	0.417933	0.00928588
ENSG00000153234	NR4A2	12.81	13.72	11.93	11.86	10.94	9.85	10.15	10.03	9.57	0.0340619	0.00935269
ENSG00000253958	CLDN23	0.96	1.31	0.69	1.47	1.59	1.29	1.6	1.72	1.15	0.0198898	0.00935738
ENSG00000133985	TTC9	1.18	1.11	1.15	1.4	1.15	1.11	1.36	1.35	1.3	0.220419	0.00942211
ENSG00000065621	GSTO2	2.03	1.63	1.5	2.65	1.72	1.87	2.54	2.13	2.25	0.0715095	0.00942756
ENSG00000069974	RAB27A	11.27	12.05	11.91	12.04	9.83	12.09	9.73	9.8	10.42	0.344431	0.00944788
ENSG00000128714	HOXD13	0.23	0.15	0.16	0.15	0.28	0.33	0.42	0.38	0.3	0.222031	0.00945089
ENSG00000117419	ERI3	65.11	61.67	60.74	71.68	66.89	62.25	69.36	64.99	66.15	0.049688	0.00948479
ENSG00000163655	GMPS	77.47	75.99	66.53	72.6	72.87	67.54	74.79	71.69	62.35	0.156809	0.00953351
ENSG00000038210	PI4K2B	9.27	11.55	7	11.26	13.15	15.06	11.57	14.9	10.79	0.10223	0.00958174
ENSG00000137628	DDX60	9.4	8.13	6.81	9.86	17.83	17.51	17.31	16.11	11.82	0.0832581	0.00958194
ENSG00000105808	RASA4	0.78	0.97	1.24	0.35	0.52	0.36	0.32	0.32	0.48	0.0286361	0.00959665
ENSG00000144746	ARL6IP5	33.16	39.49	35.86	38.76	34.52	38.1	30.44	37.84	33.45	0.39399	0.00960638
ENSG00000228716	DHFR	62.44	72.33	60.92	65.76	56.72	62.16	59.64	67.81	57.51	0.300724	0.00962218
ENSG00000129518	EAPP	30.79	28.04	25.2	29.47	25.28	26.01	26.63	25.53	21.73	0.201731	0.00972666
ENSG00000165458	INPPL1	107.22	106.34	103.97	84.96	91.24	83.2	82.5	82.99	88.82	0.00621768	0.00975867
ENSG00000140577	CRTC3	77.78	79.21	82.22	78.45	70.25	70.57	72.32	74.79	75.03	0.108751	0.00978407
ENSG00000181135	ZNF707	8.8	6.35	7.72	7.46	6.33	7.28	9.76	7.91	8.9	0.131617	0.00979917
ENSG00000213930	GALT	12.18	11.44	10.91	11.4	9.66	11.03	9.74	9.59	9.41	0.138248	0.0098027
ENSG00000198513	ATL1	2.08	2.21	2.34	1.75	1.87	1.14	1.18	1.65	1.68	0.0815832	0.00988914
ENSG00000188033	ZNF490	0.24	0.42	0.25	0.34	0.51	0.35	0.28	0.46	0.31	0.000593472	0.00990197
ENSG00000137965	IFI44	20.31	18.09	10.11	21.62	25.11	28.68	27.38	29.32	21.51	0.109698	0.00992325
ENSG00000184898	RBM43	1.5	1.4	1.28	1.44	2.48	1.88	1.71	1.69	1.63	0.121924	0.00993788
ENSG00000176472	ZNF575	0.42	0.56	0.4	1.53	0.35	0.73	0.87	0.89	0.95	0.198301	0.00998181
ENSG00000135823	STX6	9.99	10.27	10.67	10.14	9.85	10.18	9.31	9.17	9.86	0.168876	0.0100283
ENSG00000184602	SNN	4.1	4.33	5.33	3.99	3.37	4.38	3.53	3.42	4.41	0.0696709	0.0100286
ENSG00000101152	DNAJC5	30.55	29.63	31.98	28.16	27.53	28.77	28.38	26.07	29.27	0.00817986	0.0100299
ENSG00000275066	SYNRG	9.37	9.75	8.45	7.5	8.92	8.7	8.19	8.68	7.74	0.156863	0.0100358
ENSG00000143369	ECM1	1.91	2.39	2.62	3.2	2.16	2.17	2.23	2.88	3.15	0.3729	0.0100737
ENSG00000184451	CCR10	0.78	0.93	0.78	0.49	0.4	0.32	0.34	0.31	0.39	0.0133889	0.010124
ENSG00000116663	FBXO6	6.82	6.24	3.99	7.88	7.9	8.49	9.17	9.47	7.93	0.075698	0.0101807
ENSG00000144182	LIPT1	2.76	2.87	2.97	3.36	2.86	3.19	3.75	3.91	3.6	0.134154	0.0102809
ENSG00000138785	INTS12	13.5	13.9	13.09	16.79	16.81	17.45	15.76	16.35	14.56	0.00743483	0.010282
ENSG00000070413	DGCR2	16.27	16.87	17.48	16.55	15.93	16.23	19.31	19.06	21.17	0.15298	0.0103375
ENSG00000106829	TLE4	9.01	10.31	7.04	10.02	9.84	10.27	12.16	13.02	11.42	0.181476	0.0103851
ENSG00000152601	MBNL1	14.16	17.02	14.66	14.98	13.58	14.34	12.74	14.78	12.31	0.260984	0.0103908
ENSG00000107643	MAPK8	19.64	18.88	14.73	16.31	16.76	17.1	13.53	15.25	9.84	0.306897	0.0104403
ENSG00000215717	TMEM167B	11	12.08	14.33	11.41	11.04	12.97	8.93	10.18	11.33	0.17369	0.0104869
ENSG00000105186	ANKRD27	9.27	9.64	8.64	9.37	9.22	8.65	7.94	7.49	6.46	0.29278	0.0105491
ENSG00000108932	SLC16A6	16.33	16.52	16.71	13.55	16.87	15.91	12.82	13.51	11.82	0.180011	0.0105787
ENSG00000135899	SP110	10.34	6.59	3.33	6.65	12.47	11.66	15.46	13.14	11.89	0.219935	0.0105991
ENSG00000171105	INSR	3.36	3.66	3.5	3.46	2.82	3.34	2.8	3.27	3.15	0.198224	0.0106831
ENSG00000126653	NSRP1	10.39	12.71	10.27	8.78	16.22	17.46	12.19	15.46	13.32	0.178479	0.0107048
ENSG00000149418	ST14	0.63	0.49	0.63	1.24	0.69	0.69	1.03	0.76	1.09	0.110472	0.0107262
ENSG00000168228	ZCCHC4	4.45	4.72	5.29	5.2	4.84	5.18	3.05	3.67	4.45	0.214132	0.0107351
ENSG00000119396	RAB14	39.28	41.25	38.99	38.07	37.65	40.03	35.37	38.27	36.66	0.223621	0.0107695
ENSG00000181472	ZBTB2	6.89	6.75	6.93	5.37	6.43	6.46	5.94	5.53	5.33	0.089098	0.0108876
ENSG00000008282	SYPL1	53.85	58.69	55.69	54.85	52.78	55.5	48.5	53.04	47.29	0.254504	0.0108957
ENSG00000151233	GXYLT1	3.09	3.39	3.14	2.82	4.41	3.87	2.71	2.76	2.52	0.167011	0.0109403
ENSG00000157540	DYRK1A	14.17	14.33	14.88	13.65	16.26	15.42	12.42	13.31	13.39	0.228123	0.0109454
ENSG00000182327	GLTPD2	3.64	2.56	2.44	3.51	3.67	2.27	4.64	3.39	3.02	0.293155	0.0111431
ENSG00000244731	C4A	5.09	6.1	8.58	10.31	10.37	10.87	8.63	9.08	13.51	0.0225346	0.011149
XLOC_017340	TCONS_00114421	0.79	0.93	0.91	2.76	0.44	0.79	1.37	1.47	1.77	0.306941	0.0112407
ENSG00000139675	HNRNPA1L2	1.06	1.33	1.2	1.03	1.03	1.13	0.69	0.94	0.97	0.126933	0.0112407
ENSG00000101247	NDUFAF5	11.12	9.6	11.82	11.04	10.79	9.78	8.89	7.76	10.53	0.38639	0.0112532
ENSG00000163235	TGFA	4.18	4.32	5	4.6	4.09	3.82	3.03	3.51	3.6	0.275581	0.0112602
ENSG00000114383	TUSC2	31.84	31.11	30.32	28.83	27.11	23.96	26.88	27.53	24.14	0.0231432	0.0113179
ENSG00000172197	MBOAT1	5.32	4.85	5.02	6.94	6.08	5.55	7.23	5.99	6.41	0.0358019	0.0113426
ENSG00000188997	KCTD21	5.51	5.7	5.57	6.34	5.67	5.56	6.73	6.56	6.31	0.225436	0.0113701
ENSG00000102390	PBDC1	1.66	2	1.61	2.42	2.67	1.89	2.24	2.43	2.35	0.0303828	0.0113714
ENSG00000174799	CEP135	0.66	0.63	0.74	0.47	0.77	0.93	0.96	0.93	0.92	0.366612	0.0114301
ENSG00000101407	TTI1	14.72	13.43	15.14	13.29	13.64	13.22	13.95	12.92	14.25	0.122821	0.011603
ENSG00000071553	ATP6AP1	132.9	131.19	143.19	129.64	130.88	118.24	123.48	116.76	126.76	0.172825	0.0116365
ENSG00000119431	HDHD3	11.25	10.05	12.25	11.31	10.28	12	12.71	12	13.39	0.466527	0.0116395
ENSG00000136104	RNASEH2B	21.76	15.66	14.69	19.71	20.84	19.61	22.17	16.37	15.24	0.187339	0.0116959
ENSG00000083807	SLC27A5	11.61	11.82	12.53	11	13.39	10.67	7.63	9.43	9.74	0.396462	0.0117975
ENSG00000162819	BROX	10.84	14.28	9.01	11.79	14.42	15.69	14.01	16.2	11.2	0.167637	0.0118125
ENSG00000134108	ARL8B	24.73	26.56	22.49	26.12	25.25	29.07	23.66	25.84	21.83	0.219398	0.0118204
ENSG00000075239	ACAT1	103.43	110.48	108.95	106.1	100.39	108.31	96.43	100.84	96.7	0.277494	0.0119421
ENSG00000244462	RBM12	28.23	29.31	29.66	21.3	27.52	23.57	22.86	25.6	23.12	0.0450727	0.0119873
ENSG00000160803	UBQLN4	46.24	44.75	47.52	42.94	39.91	40.21	43.36	40.08	44.41	0.0238869	0.012068
ENSG00000054392	HHAT	0.53	0.68	0.42	0.73	0.95	0.91	1.28	1.63	0.96	0.0335627	0.0121111
ENSG00000156313	RPGR	1.25	1.02	2.15	1.53	2.03	2.67	2.21	1.87	2.69	0.0534171	0.0124062
ENSG00000138778	CENPE	0.43	0.76	1.24	0.34	1.23	1.55	0.8	1	1.47	0.150659	0.0124841
ENSG00000141376	BCAS3	9.86	11.25	7.79	10.73	9.52	10.41	12.71	14.39	12.49	0.344053	0.0125096
ENSG00000132207	SLX1A	9.26	11.8	20.08	21.98	8.08	19.93	22.08	27.08	28.62	0.30724	0.012512
ENSG00000065154	OAT	20.02	19.4	20.04	19.48	18.77	20.47	16.71	17.55	17.28	0.271422	0.0125156
ENSG00000103351	CLUAP1	14.44	17.5	13.32	22.16	19.94	22.12	16.26	20.01	16.55	0.0422885	0.012557
ENSG00000166189	HPS6	9.4	9.82	9.17	11.42	9.81	9.35	10.51	10.44	10.08	0.188269	0.0125732
ENSG00000143183	TMCO1	111.72	107.1	100.76	101.92	104.08	101.76	100.7	90.8	91	0.168834	0.0126389
ENSG00000107021	TBC1D13	18.72	18.79	17.56	17.12	20.25	20.99	21.6	21.34	21.82	0.265881	0.0126492
ENSG00000145107	TM4SF19	1.11	0.82	0.87	1.04	0.54	0.52	0.61	0.53	0.37	0.0545646	0.0127459
ENSG00000089248	ERP29	164.72	164.88	169.71	149	151.93	142.73	149.93	152.99	161.47	0.0247736	0.0127468
ENSG00000125991	ERGIC3	178.79	169.16	180.99	167.83	171.36	163.66	170.11	164.31	174.19	0.134792	0.0128018
ENSG00000102710	SUPT20H	10.69	9.88	11.17	10.2	10.32	10.14	9.38	7.96	10.04	0.244982	0.013002
ENSG00000122958	VPS26A	21.02	25.55	20.42	20.52	25.54	31.08	22.79	26.79	21.44	0.225438	0.013187
ENSG00000151176	PLBD2	18.34	17.61	20.15	21.12	21.11	20.02	20.36	18.78	21.55	0.102973	0.0132192
ENSG00000116005	PCYOX1	18.25	20.23	19.94	19.39	18.05	18.68	15.05	16.03	14.24	0.259784	0.0132902
ENSG00000101000	PROCR	1.89	1.49	2.01	2.76	2.77	2.38	3.34	4.01	3.77	0.0428477	0.0132975
ENSG00000122218	COPA	131.2	122.33	142.46	129.14	144.43	129.85	126.02	112.94	135.16	0.415979	0.0133427
ENSG00000204305	AGER	1.15	0.8	0.76	2.1	0.47	1.07	0.95	0.62	0.65	0.244894	0.0133944
ENSG00000172465	TCEAL1	25.43	28.82	27.52	26.76	27.06	27.21	22.58	23.82	22.53	0.404107	0.0133959
ENSG00000157445	CACNA2D3	0.8	1.1	0.68	0.76	0.93	1.1	1.11	1.32	1.08	0.366725	0.0134823
ENSG00000107077	KDM4C	6.57	6.91	6.99	5.49	6.06	6.48	5.27	5.42	4.77	0.0195137	0.013528
ENSG00000179526	SHARPIN	34.37	31.23	30.75	33.37	30.43	30.95	36.09	34.19	32.76	0.143652	0.0135301
ENSG00000149573	MPZL2	14.16	15.84	14.15	18.43	13.36	15.71	12.29	13.27	10.75	0.313255	0.0137292
ENSG00000141404	GNAL	13.37	13.68	13.88	14.35	15.47	13.55	12.02	11.47	12.49	0.159268	0.0138275
ENSG00000140022	STON2	2.93	2.11	2.06	2.5	2.84	2.62	3.17	2.48	2.28	0.255548	0.0138462
ENSG00000185973	TMLHE	7.71	7.97	8.23	8.8	7.68	9.04	8.79	8.57	9.28	0.165306	0.0139455
ENSG00000083857	FAT1	3.85	4.14	4.08	3.46	3.35	4.26	3.09	3.68	3.23	0.178972	0.0139881
ENSG00000133195	SLC39A11	3.96	5.25	3.58	4.1	4.38	4.07	4.91	6.31	5.2	0.431286	0.0140784
ENSG00000167604	NFKBID	4.82	5.14	7.66	9.31	4.33	4.65	4.38	4.32	7	0.464615	0.014184
ENSG00000167393	PPP2R3B	11.06	10.45	10.23	12.82	10.26	9.91	12.48	11.63	12.31	0.29941	0.0142426
ENSG00000139329	LUM	6.22	5.82	6.41	6.89	8.3	8.18	8.58	7.88	7.67	0.0447301	0.0143873
ENSG00000100796	PPP4R3A	24.56	29.05	25.76	26.83	26.54	27.25	21.99	26.16	21.33	0.402414	0.0145089
ENSG00000164379	FOXQ1	0.91	1.16	1.48	1.93	1.77	1.14	1.4	1.46	1.78	0.198753	0.0145332
ENSG00000099622	CIRBP	240.11	239.28	253.39	238.78	235.81	231.97	229.95	233.04	247.19	0.151837	0.0145382
ENSG00000047644	WWC3	10.29	9.86	10.75	12.24	9	9.24	10.7	10.58	11.23	0.453581	0.0146285
ENSG00000117010	ZNF684	0.49	0.96	0.78	1.46	1.38	1.08	1	1.23	1.21	0.0559944	0.0146313
ENSG00000136866	ZFP37	0.34	0.49	0.38	0.36	0.32	0.41	0.25	0.35	0.21	0.300663	0.0146432
ENSG00000150967	ABCB9	1.56	1.76	1.7	1.66	1.9	1.98	2.69	2.83	2.31	0.0432266	0.0147
ENSG00000130164	LDLR	15.5	16.7	17.72	13.93	15.68	12.65	12.74	11.49	13.58	0.090861	0.0147513
ENSG00000091436	AC013461.1	14.34	15.13	12.67	17.13	15.58	17.26	16.22	16.4	15.08	0.0806632	0.0150801
ENSG00000107669	ATE1	9.26	13.42	9.84	11.76	8.86	13.95	7.31	10.51	8.21	0.41072	0.0150907
ENSG00000037042	TUBG2	6.05	6.18	6.64	5.88	5.6	6.98	5.3	5.75	5.83	0.329327	0.0150955
ENSG00000120820	GLT8D2	5.66	6.07	5.4	6.11	6.78	7.42	6.38	6.83	6.62	0.0804297	0.0151658
ENSG00000159399	HK2	28.73	27.04	30.53	30.89	34.02	36.5	35.57	33.44	34.16	0.0377114	0.0152359
ENSG00000137198	GMPR	0.34	0.34	0.14	0.13	0.42	0.49	0.57	0.78	0.49	0.347311	0.0152739
ENSG00000119922	IFIT2	88.55	95.03	40.65	103.57	130.87	140.78	131.6	129.61	103.53	0.0941854	0.0152974
ENSG00000103067	ESRP2	19.87	17.32	19.37	18.01	18.29	16.37	16.99	15.78	16.6	0.19324	0.0153239
ENSG00000159348	CYB5R1	69.07	76.82	71.89	71.61	64.44	65.96	60	67.39	66.87	0.173896	0.0155078
ENSG00000114573	ATP6V1A	20.75	23.35	23.36	21.15	24.46	20.9	19.17	20.47	20.41	0.399483	0.0155099
ENSG00000263155	MYZAP	1.91	2.45	1.83	2.75	2.59	2.28	1.62	2.15	1.67	0.0714104	0.0155136
ENSG00000156875	MFSD14A	31.48	31.43	31.92	31.54	29.59	31.74	27.99	29.59	28.64	0.19412	0.0155647
ENSG00000106004	HOXA5	2.13	2.32	2.07	2.93	2.24	2.13	1.86	1.81	1.7	0.220715	0.0157111
ENSG00000141252	VPS53	8.19	8.09	6.83	11.45	11.65	11.36	11.16	10.04	10.6	0.00505306	0.015752
ENSG00000117318	ID3	120.26	124.39	130.18	115.34	112.02	103.58	111	106.8	117.26	0.0740521	0.0157551
ENSG00000163312	HELQ	1.45	2.15	1.2	2.35	1.8	1.57	2.46	2.98	1.72	0.243181	0.0157668
ENSG00000181773	GPR3	1.09	0.98	1.49	1.09	0.95	0.92	0.56	0.64	0.83	0.196551	0.0158131
ENSG00000150527	CTAGE5	28.72	30.42	25.71	27.41	32.71	32.77	26.92	28.3	24.62	0.192052	0.0158234
ENSG00000183647	ZNF530	4.26	3.25	3.14	3.39	3.48	2.9	5.26	4.01	3.66	0.227239	0.0158352
ENSG00000125835	SNRPB	449.62	435.8	474.28	444.41	447.08	406.41	442.46	422.11	464.12	0.24144	0.0158756
ENSG00000070061	IKBKAP	16.58	17	15.77	15.75	16.47	21.1	15.94	16.43	15.44	0.288562	0.0159243
ENSG00000137411	VARS2	15.15	17.92	13.77	20.2	15.95	15.67	19.06	20.61	18.97	0.249721	0.0161538
ENSG00000178719	GRINA	196.34	166.48	182.06	177.39	207.83	189.43	212.26	197.44	210.09	0.313496	0.0161736
ENSG00000181274	FRAT2	22.33	22.22	24.04	21.17	19.29	19.79	20.44	19.79	20.51	0.0449588	0.0161826
ENSG00000123992	DNPEP	23.29	20.64	22.4	27.17	32.66	27.92	28.71	27.63	32.57	0.0514136	0.0163878
ENSG00000127824	TUBA4A	46.01	41.4	45.69	42.25	40.36	41.65	44.44	39.92	44.88	0.0456136	0.0165048
ENSG00000196074	SYCP2	1.27	2.05	0.95	0.68	1.45	1.32	2.26	2.64	1.53	0.24249	0.0167096
ENSG00000115507	OTX1	2.18	2.51	2.62	2.55	1.73	1.97	1.67	2.25	2.15	0.216841	0.0167152
ENSG00000257103	LSM14A	66.38	61.25	58.88	63.52	59.37	61.4	61.39	51.52	51.72	0.349218	0.0167591
ENSG00000164306	PRIMPOL	2.75	2.84	2.93	2.97	3.27	3.14	3.02	3.35	3.45	0.028638	0.0168855
ENSG00000116786	PLEKHM2	28.66	28.36	28.63	27.38	26.16	27.31	28.38	28.2	28.46	0.0167258	0.0169671
ENSG00000106009	BRAT1	19.01	19.4	16.66	19.08	17.83	18.25	21.64	20.87	19.58	0.488379	0.0170098
ENSG00000108395	TRIM37	11.42	10.86	10.39	10.18	11.23	11.78	10.57	9.78	8.78	0.420957	0.0172468
ENSG00000178385	PLEKHM3	1.31	1.33	1.3	1.21	1.11	1.55	1.09	1.22	1.13	0.441884	0.017263
ENSG00000138035	PNPT1	42.43	34.53	22.28	39.51	50.9	53.48	53.45	56.67	39.73	0.135426	0.0173093
XLOC_030310	TCONS_00194579	0.89	1.04	0.61	0.61	0.68	1.22	1.24	1.43	1.24	0.48863	0.0173782
ENSG00000181610	MRPS23	56.69	61.4	56.15	59.06	53.85	53.86	51.36	58.1	49.49	0.238235	0.0174168
ENSG00000105821	DNAJC2	7.44	9.23	7.78	6.71	10.24	10.05	9.06	10.27	9.87	0.215737	0.0174349
ENSG00000119917	IFIT3	145.43	137.02	53.54	166	196.4	213.82	205.71	210.95	166.63	0.0971843	0.0174706
ENSG00000137267	TUBB2A	1.87	1.84	1.61	1.98	1.78	1.58	1.27	1.53	1.01	0.455189	0.0174808
ENSG00000172687	ZNF738	5.06	6.73	6.48	6.41	3.7	6.8	4.69	6.12	5.73	0.382192	0.0175421
ENSG00000100567	PSMA3	66.58	68.91	56.82	69.36	83.69	78.19	72.04	79.97	65.68	0.0699391	0.0175653
ENSG00000167549	CORO6	2.64	1.94	1.84	1.79	1.12	2.28	1.62	1.33	1.26	0.218278	0.0175868
ENSG00000146733	PSPH	95.2	97.07	89.88	88.4	84.13	79.91	84.97	78.55	78.44	0.0152908	0.0176421
ENSG00000099904	ZDHHC8	9.14	7.6	12.39	9.62	10.73	9.69	8.23	6.28	10.58	0.436874	0.0176758
ENSG00000148356	LRSAM1	9.8	9.68	8.05	11.62	11.16	9.89	12.73	12.42	12.92	0.00230795	0.0177667
ENSG00000197324	LRP10	47.81	44.81	46.95	49.31	49.48	45.63	53.79	48.19	53.84	0.224368	0.0178451
ENSG00000198189	HSD17B11	3.91	4.22	3.13	5.24	6.08	4.37	4.81	4.66	3.89	0.00836375	0.0179021
ENSG00000132429	POPDC3	1.12	1.72	1.63	0.75	0.85	0.98	0.66	1.05	0.71	0.0244527	0.0179179
ENSG00000139624	CERS5	25.09	22.15	27.32	23.12	21.24	21.06	21.6	19.52	22.2	0.101764	0.0179724
ENSG00000137161	CNPY3	33.3	33.08	36.08	33.8	34.34	33.77	31.28	30.16	32.04	0.440721	0.0180261
ENSG00000164715	LMTK2	7.54	7.86	7.98	6.89	7.24	7.44	6.74	6.58	6.34	0.00147388	0.0182058
ENSG00000134897	BIVM	4.65	6.03	5.99	5.07	3.92	5.55	3.8	4.32	4.76	0.219992	0.0183353
ENSG00000011638	TMEM159	26.71	28.01	29.99	25.72	25.47	28.11	23.4	24.17	28.13	0.0283927	0.0183509
ENSG00000089335	ZNF302	5.97	6.97	6.18	5.06	6.03	6.69	5.14	5.29	4.57	0.224525	0.0185838
ENSG00000165502	RPL36AL	65.68	74.28	58.78	68.87	81.34	83.21	75.89	79.56	69.49	0.109378	0.0185905
ENSG00000170775	GPR37	7.08	7.13	7.78	5.85	6.2	5.91	5.89	5.54	5.43	0.0200217	0.0186872
ENSG00000188910	GJB3	5.96	5.31	5.33	6.26	5.45	5.61	6.5	6.03	5.68	0.0206387	0.0187056
ENSG00000146072	TNFRSF21	2.92	2.95	2.4	3.95	3.81	3.71	3.72	4.16	4.04	0.00739607	0.0187544
ENSG00000164953	TMEM67	4.94	5.12	4.18	3.96	5.26	4.03	3.48	4.35	3.26	0.214568	0.0187939
ENSG00000170379	TCAF2	0.33	0.15	0.48	0.53	0.26	0.53	0.79	0.55	0.7	0.0552504	0.0189298
ENSG00000084733	RAB10	93.6	95.1	85.56	91.31	87.01	97.04	87.46	89.46	75.27	0.477684	0.0189334
ENSG00000176371	ZSCAN2	5.21	8.67	7.88	6.61	5.13	6.33	4.06	6.43	6.42	0.24084	0.018977
ENSG00000243335	KCTD7	3.78	3.23	4.06	2.33	2.45	2.9	2.39	2.55	2.73	0.0141152	0.0189788
ENSG00000197223	C1D	17.83	21.04	16.63	16.59	17.65	20.17	15.33	16.5	13.94	0.437764	0.0189838
ENSG00000186300	ZNF555	0.67	1.01	0.84	0.93	1.05	1.64	1.1	1.42	1.05	0.122934	0.018996
ENSG00000115145	STAM2	3.36	3.97	2.85	3.35	3.53	4.85	3.73	4.61	3.21	0.281505	0.0190228
ENSG00000162241	SLC25A45	6.09	5.59	4.74	6.6	7.1	5.7	6.76	6.41	5.13	0.037646	0.0190668
ENSG00000159110	IFNAR2	9.78	9.3	8.95	11.83	9.58	9.33	10.32	9.82	9.88	0.128116	0.0190879
ENSG00000135655	USP15	11.1	12.01	8.51	10.15	9.71	12.32	10.23	10.92	6.82	0.464476	0.0191254
ENSG00000187961	KLHL17	3.51	4.01	6.15	3.94	3.15	3.04	3.13	3.24	5.39	0.186072	0.0191647
ENSG00000115425	PECR	8.92	8.35	8.38	6.92	6.43	5.33	5.4	6.39	4.24	0.011843	0.0192759
ENSG00000103091	WDR59	17.32	19.13	22.43	20.26	15.74	12.54	14.96	15.16	17.45	0.225157	0.0192979
ENSG00000125775	SDCBP2	2.17	2.29	2.21	1.48	2.57	2	2.31	2.56	2.38	0.26867	0.0194617
ENSG00000020181	ADGRA2	0.34	0.47	0.43	0.41	0.34	0.42	0.37	0.53	0.47	0.363452	0.0195062
ENSG00000128422	KRT17	523.55	530.43	502.48	555.46	511.93	527.6	584.64	600.85	617.82	0.250761	0.0195064
ENSG00000100342	APOL1	8.36	7.38	5.3	7.53	10.56	11.87	11.72	11.18	11.6	0.14948	0.0196028
ENSG00000101901	ALG13	31.37	35.68	30.94	34.08	29.61	37.44	29.77	33.1	27.55	0.402505	0.0197903
ENSG00000177200	CHD9	3.8	5.86	4.53	3.6	4.95	7.87	4.12	6.38	5.21	0.31435	0.0198712
ENSG00000146232	NFKBIE	2.53	3.72	3.08	2.66	3.03	2.64	1.81	2.36	2.26	0.151617	0.0198886
ENSG00000149089	APIP	7.92	9.49	8.26	8.18	7.25	7.8	7.35	8.85	7.19	0.19395	0.0198968
ENSG00000100603	SNW1	40.15	42.43	40.6	46.91	50.27	45.38	38.93	40.52	39.63	0.00934967	0.0198971
ENSG00000105559	PLEKHA4	3.37	3.86	1.68	3.41	5.71	5.21	5.37	7.87	5.85	0.107432	0.0199117
ENSG00000014641	MDH1	105.45	119.46	103.3	108.16	106.43	108.55	101.63	112.27	98.99	0.397701	0.0199297
ENSG00000068697	LAPTM4A	256.59	261.19	251.56	256.5	268.69	267.67	264.55	269.17	265.75	0.117926	0.0200365
ENSG00000054690	PLEKHH1	3.08	2.35	2.07	2.62	2.23	3.3	3.87	3.96	3.15	0.357706	0.020131
ENSG00000167232	ZNF91	0.66	0.37	0.43	0.86	0.5	0.67	1.22	1.06	0.75	0.0137255	0.0201536
ENSG00000173193	PARP14	15.34	11.03	8.34	13.71	21.71	20.42	20.29	21.55	16.13	0.123622	0.0202118
ENSG00000125826	RBCK1	112.36	96.49	107.75	114.41	120.81	117.32	133.19	134.87	129.98	0.104242	0.0202188
ENSG00000137343	ATAT1	2.87	3.55	3.08	2.95	2.07	2.87	2.32	2.55	2.51	0.189527	0.0202687
ENSG00000149485	FADS1	107.38	102.06	98.29	100.66	96.1	95.21	93.24	95.39	88.05	0.0208812	0.0203987
ENSG00000109991	P2RX3	0.89	0.79	0.43	0.63	1.19	0.92	1.12	1.15	0.92	0.234071	0.0204119
ENSG00000102738	MRPS31	8.85	8.82	7.43	8.84	7.57	7.77	7.46	7.17	6.67	0.29499	0.0204313
ENSG00000186470	BTN3A2	23.87	21.72	19.34	26.33	24.38	23.08	27.88	30.22	27.43	0.00882088	0.0204552
ENSG00000254505	CHMP4A	85.83	89.76	88.12	84.63	91.86	86.29	92.62	94.35	91.4	0.411483	0.0206096
ENSG00000146373	RNF217	3.68	3	3.05	3.09	2.86	3	3.3	2.73	2.49	0.129928	0.0206106
ENSG00000145725	PPIP5K2	3.55	3.92	4.28	4.11	5.52	5.09	6.65	7.27	5.84	0.0436512	0.0206198
ENSG00000084207	GSTP1	56.02	58.42	54.11	57.82	56.4	50.67	62.57	61.85	61.59	0.258587	0.0207732
XLOC_007121	TCONS_00044324	11.99	12.79	15.29	14.33	10.61	9.9	7.99	10.91	12.47	0.259107	0.0209658
ENSG00000165672	PRDX3	156.97	175.77	152.96	171.84	153.88	156.24	143.92	153.73	141.47	0.459511	0.0210143
ENSG00000065518	NDUFB4	279.54	281.8	273.22	271.86	257.04	268.12	266.32	274.95	265.36	0.0898333	0.0211204
ENSG00000101544	ADNP2	10.45	10.02	10.36	9.01	9.84	9.98	8.55	9.05	8.23	0.115134	0.0212046
ENSG00000106003	LFNG	2.34	2.09	2.28	2.24	1.8	2	1.89	1.48	2	0.0343178	0.0213064
ENSG00000150995	ITPR1	7.56	7.64	6.95	5.32	8.53	8.52	5.5	5.87	6.02	0.477922	0.0213525
ENSG00000091622	PITPNM3	8.57	8.23	9.92	8.78	7.74	7.17	8.13	7.82	9.15	0.187746	0.0213548
ENSG00000166557	TMED3	136.9	134.17	134.85	126.57	121	117.2	120.29	124.04	126.47	0.011645	0.0214033
ENSG00000173418	NAA20	47.97	53.96	44	46.63	43.01	46.53	43.43	47.94	41.26	0.251065	0.0214202
ENSG00000187017	ESPN	18.34	16.97	12.03	23.11	17.56	15.37	22.5	22.96	20.84	0.070902	0.0214351
ENSG00000105778	AVL9	11.55	10.23	7.01	9.95	11.58	9.32	13.68	13.08	11.41	0.309246	0.0214739
ENSG00000148841	ITPRIP	24.44	24.37	24.34	21.49	22.61	22.24	22.45	21.04	22.64	0.011726	0.0215381
ENSG00000169641	LUZP1	12.4	11.37	12.61	10.52	10.16	10.69	9.39	9.46	8.45	0.00924505	0.021552
ENSG00000166548	TK2	27.29	29.27	27.88	30.06	28.22	28.91	28.72	30.47	28.52	0.24688	0.021666
ENSG00000100888	CHD8	14.99	16.83	15.59	11.14	13.22	15.71	10.28	14.49	10.42	0.0986302	0.0216711
ENSG00000101846	STS	8.44	7.84	5.86	9.28	9.21	10.4	9.22	9.01	7.54	0.0954014	0.0216906
ENSG00000114902	SPCS1	172.19	178.86	185.03	162.07	159.45	152.84	157.89	170.32	166.04	0.0423035	0.0219507
ENSG00000135763	URB2	8.79	7.78	7.89	8.31	7.18	7.24	8.13	7.34	7.58	0.00378236	0.0220641
ENSG00000138646	HERC5	42.76	35.89	20.22	43.69	51.85	55.16	54.34	53.26	45.35	0.110605	0.0221444
ENSG00000128713	HOXD11	0.96	0.8	1.02	1.02	1.05	1.46	1.56	1.5	1.33	0.0751509	0.0221774
ENSG00000007202	KIAA0100	77.24	69.88	79.59	73.73	66.99	69.9	68.41	65.16	68.91	0.0660565	0.0222047
ENSG00000169084	DHRSX	23.34	26.89	24.03	19.67	21.77	22.38	20.14	19.65	17.97	0.0371958	0.0222054
ENSG00000096093	EFHC1	3.32	2.82	4.62	4.12	5.05	3.49	5.32	4.02	5.62	0.291042	0.0222335
ENSG00000124613	ZNF391	0.74	0.47	0.7	0.58	0.55	0.8	1.03	0.62	1.04	0.471828	0.0223256
ENSG00000115107	STEAP3	4.73	4.45	5.34	3.87	4.41	5.08	5.19	4.7	5.59	0.127654	0.0223349
ENSG00000151014	NOCT	6.14	5.08	5.01	5.03	5.97	6.51	6.69	6.32	6.12	0.321272	0.0223799
ENSG00000197362	ZNF786	2.44	2.21	2.33	2.44	2.57	2.42	2.33	1.96	2.12	0.14993	0.022406
ENSG00000250305	KIAA1456	1.26	1.73	0.87	1.01	0.55	0.87	0.54	0.89	0.5	0.157762	0.0224118
ENSG00000105193	RPS16	1511.38	1506	1571.23	1474.43	1470.24	1409.43	1461.72	1411.19	1458.34	0.101252	0.0224159
ENSG00000106615	RHEB	161.7	157.34	155.94	149.65	141.23	154.03	156.29	145.77	144.02	0.0704545	0.0224695
ENSG00000167642	SPINT2	8.97	7.12	9.71	10.42	9.33	7.61	9.49	7.91	10.85	0.366603	0.0225287
ENSG00000173457	PPP1R14B	158.35	157.31	150.48	166.7	159.73	155.1	170.91	180.5	179.17	0.0487327	0.0226503
ENSG00000159314	ARHGAP27	5.03	3.65	4.68	3.13	3.32	6.13	2.67	2.61	2.88	0.406677	0.0227035
ENSG00000153814	JAZF1	9.7	9.23	8.48	9.24	9.3	10.2	10.52	10.57	10.32	0.284525	0.0227369
ENSG00000165526	RPUSD4	14	12.45	13.14	15.92	14.65	14.03	16.35	17.84	17.47	0.0262229	0.0228474
ENSG00000186591	UBE2H	34.65	33.19	29.76	34.8	34.74	32.06	28.13	28.74	26.79	0.0842795	0.0228728
ENSG00000142089	IFITM3	1675.08	1325.76	1520.67	1573.93	1875.42	1702.82	1953.48	1909.4	1884.73	0.190288	0.0230368
ENSG00000141574	SECTM1	35.24	30.81	24.61	39.24	45	42.62	47.49	49.09	51.58	0.0510148	0.023133
ENSG00000181396	OGFOD3	16.99	15.2	15.84	15.72	15.1	14.4	16.28	14.66	14.7	0.0780895	0.0233669
ENSG00000255112	CHMP1B	44.57	43.58	43.15	44.75	36.24	37.37	36.04	39.26	38.3	0.100243	0.0234197
ENSG00000065328	MCM10	7.24	9.17	8.38	8.29	8.22	9.36	6.59	7.66	7.19	0.318953	0.0234877
ENSG00000113851	CRBN	12.15	11.88	11.99	11.71	9.68	11.82	10.2	10.79	10.99	0.139477	0.023508
ENSG00000135597	REPS1	7.38	8.52	7.19	8.1	7.98	8.2	9.79	9.56	9.35	0.246067	0.0235892
ENSG00000103528	SYT17	9.91	11.38	11.07	8.15	8.96	9.22	7.31	10.23	9.26	0.00520219	0.0237645
ENSG00000163840	DTX3L	51.36	45.3	24.26	54.45	63.91	65.47	66.4	67.84	57.79	0.0993053	0.0238354
ENSG00000276045	ORAI1	16.82	17.91	17	16.79	17.56	16.74	15.02	16.68	16.2	0.0772607	0.0239013
ENSG00000278299	TBC1D3C	0.89	0.43	0.79	0.87	0.91	0.47	1.07	0.85	1.17	0.429986	0.0239801
ENSG00000136051	KIAA1033	6.76	7.4	6.47	7.31	11.37	11.61	11.32	11.51	8.42	0.0721624	0.0240387
ENSG00000114416	FXR1	36.03	42.16	35.64	35.9	36.76	41.19	34.39	38.56	31.86	0.499255	0.0241123
ENSG00000178922	HYI	59.85	59.95	55.98	52.99	56.59	48.61	50.37	51.29	51.92	0.0216139	0.0241128
ENSG00000133872	SARAF	40.55	42.04	43.64	40.95	41.69	39.48	38.09	40.02	39.46	0.217094	0.024185
ENSG00000130287	NCAN	0.22	0.22	0.2	0.28	0.21	0.1	0.35	0.28	0.34	0.376684	0.0242803
ENSG00000052749	RRP12	19.36	19.46	18.44	16.9	18.76	17.59	20	20.97	19.78	0.0705003	0.0242935
ENSG00000099875	MKNK2	87.12	78.83	83.29	81.83	79.16	73.47	83.98	77.3	81.47	0.117656	0.024328
ENSG00000204060	FOXO6	0.62	0.84	1.04	1.02	0.68	0.73	0.46	0.46	0.73	0.461927	0.0243299
ENSG00000214413	BBIP1	9.88	10.2	10.53	10.06	10.97	9.81	9.28	9.18	9.13	0.437916	0.024423
ENSG00000163960	UBXN7	11.01	10.57	12.45	11.12	10.94	10.1	9.86	9.96	11	0.273326	0.0244585
ENSG00000084234	APLP2	223.67	207.66	232.49	214.09	215.25	218.1	218.09	201.5	221.39	0.249551	0.0245281
ENSG00000181007	ZFP82	0.78	0.69	0.92	0.54	0.46	0.46	0.22	0.44	0.34	0.026961	0.02463
ENSG00000073803	MAP3K13	18.31	16.94	17.13	18.3	15.54	18.08	17.11	16.43	16.25	0.421515	0.0247026
ENSG00000273983	HIST1H3G	1.46	1.37	1.6	1.97	1.82	1.75	1.64	1.79	1.9	0.0399376	0.0247068
ENSG00000180628	PCGF5	31.02	33.16	20.05	34.03	38.3	38.46	37.82	40.52	33.49	0.103754	0.0247393
ENSG00000176894	PXMP2	33.34	33.55	31.45	30.87	30.32	28.09	31.68	30.86	27.6	0.00417037	0.0248037
ENSG00000170085	SIMC1	0.39	0.65	0.75	0.81	0.96	0.61	0.22	0.25	0.46	0.184866	0.0248546
ENSG00000164611	PTTG1	144.32	156.24	153.55	141.32	132.39	126.54	129.54	123.94	133.49	0.0699908	0.0248885
ENSG00000089177	KIF16B	2.11	2.35	2.09	3.01	2.68	2.86	2.44	2.78	2.27	0.0304388	0.0248888
ENSG00000143753	DEGS1	66.13	60.62	67.03	58.94	64.51	56.51	60.18	58.12	61.55	0.200553	0.0250447
ENSG00000144642	RBMS3	0.22	0.47	0.31	0.57	0.53	0.37	0.5	0.79	0.88	0.123264	0.025049
ENSG00000110315	RNF141	10.26	8.68	7.11	10.36	9.5	11.76	10.93	10.22	8.66	0.159541	0.0250617
ENSG00000115648	MLPH	1.31	1.2	1.42	1.57	1.27	0.94	0.7	0.91	0.72	0.421322	0.0251703
ENSG00000183628	DGCR6	15.18	16.69	16.16	17.49	16.12	16.26	16.65	19.49	19.71	0.276952	0.0251797
ENSG00000107175	CREB3	25.49	24.47	24.28	27.74	26.59	24.79	26.67	27.13	25.99	0.050386	0.0253205
ENSG00000123191	ATP7B	0.58	0.89	0.63	0.7	0.52	0.44	0.37	0.57	0.49	0.206588	0.025431
ENSG00000120539	MASTL	19.54	21.35	15.28	19.25	23.11	23.36	21.42	24.86	17.06	0.166828	0.025441
ENSG00000111801	BTN3A3	12.8	12.04	9.84	17.49	14.13	17.72	15.68	18.07	16.87	0.0500406	0.0255857
ENSG00000135372	NAT10	22.83	24.17	24.63	22.74	24.91	25.55	25.59	28.15	26.32	0.117246	0.0256022
ENSG00000130193	THEM6	31.97	33.92	32.82	32.18	30.6	27.9	29.86	29.12	29.73	0.109695	0.0256786
ENSG00000110931	CAMKK2	16.92	15.57	17.75	17.89	16.08	18.23	18.46	18.05	18.86	0.027083	0.025831
ENSG00000168016	TRANK1	14	10.66	2.31	15.16	23.92	16.9	22.7	20.49	20.12	0.0759649	0.0258549
ENSG00000132274	TRIM22	9.63	3.54	3.28	6.7	14.15	16.68	15.45	14.6	8.92	0.149086	0.0258755
ENSG00000231925	TAPBP	37.46	42.74	36.18	41.88	50.43	47.38	53.53	49.27	49.85	0.0290044	0.025915
ENSG00000051009	FAM160A2	12.79	14.07	15.89	14.79	10.08	11.38	10.77	9.25	12.51	0.204277	0.0259806
ENSG00000143363	PRUNE1	22.58	22.09	21.74	21.57	17.74	18.19	20.92	18.76	19.95	0.0491373	0.0259821
ENSG00000159917	ZNF235	0.82	0.7	0.71	0.99	0.89	0.95	1.07	0.84	1.05	0.00533021	0.026054
ENSG00000174282	ZBTB4	20.61	19.99	21.3	19.84	20.22	19.74	19.57	18.91	20.85	0.154542	0.026069
ENSG00000173660	UQCRH	285.52	282.53	289.66	271.25	284.22	271.95	265.76	270.69	261.34	0.116601	0.0261721
ENSG00000081386	ZNF510	2.06	2.62	2.34	2.02	2.04	2.18	1.58	2.01	1.3	0.126585	0.0261891
ENSG00000156110	ADK	72.36	68.46	67.91	68.95	67.87	69.6	65.41	65.56	63.05	0.326852	0.0262192
ENSG00000146872	TLK2	20.03	17.15	18.27	17.84	19.73	21.61	21.74	19.63	19.31	0.273543	0.0262518
ENSG00000125952	MAX	59.85	51.91	48.13	61.08	68.58	61.71	69.94	76.89	67.61	0.078041	0.0263384
ENSG00000041357	PSMA4	260.23	269.17	192.29	280.65	287.02	294.34	303.69	298.09	259.6	0.116385	0.026595
ENSG00000269028	MTRNR2L12	1.02	1.01	0.61	0.19	0.61	0.9	0.68	0.4	0.32	0.219071	0.026621
ENSG00000132471	WBP2	56.44	56.27	58.84	51.79	56.8	54.35	53.41	48.71	52.22	0.11677	0.0266521
ENSG00000101347	SAMHD1	18.68	12.98	9.35	17.01	24.28	23.41	24.36	27.11	20.18	0.122489	0.0266788
ENSG00000187079	TEAD1	28.22	34.93	32.73	33.61	34.5	33.95	25.1	29.43	25.09	0.178153	0.0267028
ENSG00000174442	ZWILCH	15.94	20.34	15.4	18	18.84	15.11	13.88	18.56	11.67	0.46961	0.0267815
ENSG00000153922	CHD1	5.7	7.05	6.31	5.85	8.03	11.1	8.89	9.73	7.58	0.150629	0.0267857
ENSG00000135482	ZC3H10	1.03	1	1.27	0.96	1.96	1.1	1.48	1.4	1.45	0.287358	0.0268454
ENSG00000197409	HIST1H3D	0.68	0.46	1.1	0.88	1.69	0.29	1.09	1.37	1.64	0.379579	0.0268508
ENSG00000168394	TAP1	141.28	119.59	87.58	146.66	170.3	161.8	179.5	182.47	179.81	0.082264	0.0269872
ENSG00000123472	ATPAF1	61.87	55.09	50.69	66.78	62.48	61.28	64.42	59.1	56.76	0.0217133	0.0270459
ENSG00000133104	SPG20	17.7	22.77	16.91	16.01	19.37	21.92	16.46	19.64	14.21	0.496326	0.0270813
ENSG00000182400	TRAPPC6B	12.53	14.66	14.4	10.82	12.26	12.89	10.97	11.7	10.49	0.0100438	0.02712
ENSG00000183578	TNFAIP8L3	0.74	0.92	1.11	1.01	1.14	1.37	1.18	1.1	1.54	0.00185628	0.0271421
ENSG00000198455	ZXDB	10.68	11.53	10.02	11.11	9.11	10.22	7.92	9.03	8.92	0.290461	0.0271751
ENSG00000166847	DCTN5	79.07	74.25	75.36	67.97	70.89	68.6	75.73	66.47	67.03	0.0436682	0.0272765
ENSG00000096696	DSP	33.26	33.98	27.53	33.21	42.73	41.3	41.28	37.76	37.15	0.102418	0.0273536
ENSG00000136870	ZNF189	2.71	3.05	2.94	2.77	2.46	2.42	2.41	2.5	2.19	0.115702	0.027363
ENSG00000132256	TRIM5	8.61	6.24	4.02	7.76	10.3	9.41	11.39	9.72	10.11	0.134983	0.0274829
ENSG00000158234	FAIM	27.29	30.21	23.52	27.54	26.87	26.34	23.79	24.08	20.72	0.482199	0.0274833
ENSG00000129226	CD68	26.07	24.51	28.65	34.29	32.01	32.45	36.23	32.97	32.63	0.0207706	0.0274872
ENSG00000084463	WBP11	32.21	41.09	37.97	34.64	30.64	33.87	28.46	35.01	28.89	0.195378	0.0275015
ENSG00000181826	RELL1	1.14	0.79	0.85	1.31	1.02	1.29	1.53	1.57	1.25	0.0379311	0.0276139
ENSG00000066735	KIF26A	17.19	17.16	17.1	16.01	17.17	15.2	15.84	13.92	14.98	0.103764	0.0276217
ENSG00000165410	CFL2	70.65	75.19	78.13	70.39	75.59	69.22	57.38	66.87	58.05	0.216267	0.0276427
ENSG00000077458	FAM76B	4.3	5.19	4.04	4	5.22	4.56	3.54	4.38	2.49	0.379935	0.0276759
ENSG00000182150	ERCC6L2	1.52	3.11	1.48	3.65	3.39	3.26	2.95	4.46	2.05	0.0664588	0.0276891
ENSG00000160183	TMPRSS3	52.68	54.65	49.44	52.79	54.49	53.58	56.12	59.98	57.68	0.215124	0.0278062
ENSG00000116957	TBCE	25.1	26.18	21.64	22.66	25.18	26.93	24.26	24.19	20.38	0.409649	0.0278521
ENSG00000167964	RAB26	19.22	20.25	17.66	18.65	16.92	17.93	18.25	18.4	16.76	0.190815	0.0278671
ENSG00000110880	CORO1C	35	36.46	37.72	37.55	32.15	36.14	29.67	33.46	35.29	0.316389	0.0280364
ENSG00000131100	ATP6V1E1	105.47	100.58	102.23	92.78	98.81	94.81	88.12	93.52	84.72	0.0734094	0.0280522
ENSG00000155918	RAET1L	2.6	2.19	2.07	3.06	2.06	2.33	2.89	2.87	2.49	0.187002	0.0280619
ENSG00000115947	ORC4	21.96	26.46	19.67	20.28	28.24	19.86	19.92	23.89	15.15	0.4659	0.0281278
ENSG00000100478	AP4S1	2.67	4	3.06	3.09	2.95	2.19	1.58	3.21	2.63	0.196518	0.028131
ENSG00000165819	METTL3	28.15	26.73	29.34	24.66	25.9	23.66	26	25.89	27.73	0.0702954	0.0281552
ENSG00000205302	SNX2	16.55	17.88	12.93	16.34	17.2	19.07	15.18	16.69	12.4	0.25481	0.0281579
ENSG00000131370	SH3BP5	46.14	51.66	41.53	45.45	41.07	44.94	40.38	42.14	37.43	0.296187	0.0282166
ENSG00000054116	TRAPPC3	67.35	77.05	72.04	57.78	60.28	58.55	58.22	63.32	66.45	0.0118511	0.0282783
ENSG00000135269	TES	73.93	77.23	73.77	73.5	71.47	73.54	66.3	72.9	62.86	0.179394	0.0284212
ENSG00000089060	SLC8B1	45.42	44.45	44.14	50.12	45.36	46.99	49.03	50.85	53.26	0.0616564	0.0284798
ENSG00000148303	RPL7A	1677.32	1691.4	1812.14	1692.16	1596	1649.78	1639.84	1666.67	1752.72	0.128767	0.0285684
ENSG00000056558	TRAF1	0.34	0.39	0.41	0.41	0.27	0.71	0.39	0.52	0.51	0.281707	0.0285955
ENSG00000181381	DDX60L	42.9	39.53	17.33	45.27	59.55	53.6	64.09	57.77	56.54	0.0919215	0.0286
ENSG00000105855	ITGB8	2.49	3.5	2.67	2.89	4.24	3.98	3.4	3.95	3.13	0.045707	0.028605
ENSG00000044090	CUL7	7.17	7.22	7.04	7.7	6.3	5.83	6.32	6.43	6.71	0.213079	0.0286218
ENSG00000160094	ZNF362	10.93	11.63	9.57	15.64	11.52	11.22	13.16	13.03	13	0.138568	0.0286768
ENSG00000135250	SRPK2	15.68	17.82	15.46	14.15	14.22	15.25	13.75	14.87	14.26	0.10648	0.0286805
ENSG00000163565	IFI16	49.81	53.5	23.75	52.51	73.23	73.29	68.06	71.75	60.29	0.110884	0.0286816
ENSG00000162676	GFI1	0.56	0.69	0.4	0.23	0.16	0.52	0.3	0.19	0.16	0.163997	0.0287211
ENSG00000197724	PHF2	9.39	8.96	10.03	9.02	8.58	8.94	9.18	8.78	9.95	0.0618153	0.0287732
ENSG00000119280	C1orf198	8.2	7.94	8.13	7.59	7.8	8.01	7.15	7.19	7.72	0.105895	0.0287964
ENSG00000185745	IFIT1	223.33	232.05	75.07	233.54	287.6	302.57	298.16	305.55	223.82	0.138846	0.0288242
ENSG00000116213	WRAP73	12.94	13.07	13.38	13.95	10.93	12.19	14.51	15.31	14.26	0.247152	0.0288343
ENSG00000108691	CCL2	1.71	2.85	1.16	3.29	2.86	3.31	2.88	3.88	3.36	0.0953575	0.0289133
ENSG00000104823	ECH1	258.43	266.26	294.09	283.77	290.69	269.85	274.73	272.83	304.81	0.327556	0.0289656
ENSG00000122550	KLHL7	14.13	14.84	12.53	15.39	14.5	14.75	13.12	13.82	10.49	0.14801	0.0289844
ENSG00000064703	DDX20	8.09	8.48	7.35	8.95	8.94	8.18	7.81	8.35	7.2	0.0153673	0.0289958
ENSG00000167377	ZNF23	1.82	1.57	2.11	2.42	1.86	2.94	2.4	1.79	2.57	0.0335309	0.0290106
ENSG00000110395	CBL	6.93	7	7.17	7	6.3	6.64	6.51	6.28	6.11	0.119817	0.0290364
ENSG00000130956	HABP4	3.85	4.32	4.75	3.87	3.89	3.69	3.26	3.17	3.21	0.129086	0.0290505
ENSG00000175182	FAM131A	11.99	12.7	13.97	10.54	11.42	10.07	10.54	10.14	12.84	0.0603491	0.0292045
ENSG00000186501	TMEM222	28.31	27.28	29.61	28.24	27.34	28.22	26.79	24.1	27.97	0.209886	0.0292049
ENSG00000131016	AKAP12	0.29	0.34	0.37	0.41	0.64	0.36	0.23	0.29	0.26	0.13387	0.0292435
ENSG00000161179	YDJC	26.78	29.59	27.27	27.5	26.77	25.26	23.09	25.38	25.68	0.164566	0.0292624
ENSG00000159063	ALG8	90.52	85.33	88.19	81.81	87.83	90.89	79.45	80.44	81.94	0.392839	0.0292795
ENSG00000157538	DSCR3	25.51	24.89	28.07	24.13	21.63	24.78	22.53	23.77	25.65	0.0263229	0.0293301
ENSG00000141736	ERBB2	16.07	17.06	14.78	14.5	13.56	13.14	14.05	15.56	14.01	0.0356974	0.029337
ENSG00000119977	TCTN3	21.04	19.25	21.41	19.07	17.45	17.93	18.48	18.1	20	0.0227532	0.0294038
ENSG00000136754	ABI1	14.28	13.72	14.19	16.94	14.08	16.05	13.79	13.27	13.24	0.0686271	0.0295712
ENSG00000130005	GAMT	64.84	67.28	66.58	71.21	62.94	59.98	66.61	67.98	68.39	0.369994	0.0296078
ENSG00000156587	UBE2L6	2.48	2.83	3.58	9.55	10.34	10.91	10.74	12.02	13.43	0.466639	0.92961
ENSG00000144451	SPAG16	3.39	3.88	3.52	2.53	3.09	3.27	2.51	3.47	2.42	0.040725	0.0297425
ENSG00000115365	LANCL1	60.28	59.09	48.84	58.36	54.18	60.26	54.3	54.5	46.6	0.394657	0.0297786
XLOC_020039	TCONS_00131270	2.3	2.48	1.79	2.3	1.77	1.55	1.98	1.72	1.34	0.134085	0.0298424
ENSG00000116001	TIA1	15.83	16.26	15.96	18.29	19.8	26.49	19.07	24.41	21.25	0.0806202	0.0298797
ENSG00000114302	PRKAR2A	24.42	25.2	24.48	26.25	25.93	28.16	23.82	23.83	22.86	0.0684635	0.0299678
ENSG00000104320	NBN	9.36	10.51	7.18	10.19	10.14	10.91	11.43	13.74	8.47	0.18494	0.029984
ENSG00000144580	CNOT9	29.22	27.98	28.74	27.84	27.34	30.54	30.23	28.51	30.14	0.473052	0.0300179
ENSG00000125844	RRBP1	73.92	68.28	57.62	78.06	94.2	87.16	95.44	86.38	97.69	0.0646174	0.0300623
ENSG00000124882	EREG	4.13	5.09	4.44	5.95	5.81	6.27	5.58	6.63	5.02	0.0291987	0.0301248
ENSG00000108669	CYTH1	9.52	9.25	9.93	11.96	10.52	9.51	10.21	11.12	11.4	0.158687	0.0302724
ENSG00000180979	LRRC57	10.48	11.47	10.5	10.75	7.85	9.82	9.47	9.63	9.69	0.184999	0.0303893
ENSG00000069248	NUP133	19.52	22.5	18.36	25.16	20.96	24.6	21.11	24.29	19.02	0.150928	0.0304027
ENSG00000106785	TRIM14	43.33	33.52	27.11	46.94	50.54	48.63	52.57	53.52	52.27	0.0603139	0.0304206
ENSG00000006606	CCL26	5.79	6.37	4.97	8.45	8.22	7.02	8.21	7.57	8.21	0.00609243	0.030542
ENSG00000153767	GTF2E1	18.17	18.72	17.08	13.53	14.91	20.36	16.94	15.48	14.85	0.281849	0.030677
ENSG00000132825	PPP1R3D	1.88	2.17	1.73	2.42	2.09	2.19	1.52	1.51	1.44	0.127966	0.030692
XLOC_009787	TCONS_00061432	0.69	0.63	0.6	0.7	0.61	0.53	0.36	0.28	0.47	0.18573	0.0307481
ENSG00000164329	PAPD4	7.42	8.29	6.77	6.63	9.86	7.89	6.52	6.62	6.03	0.236823	0.0307584
XLOC_022074	TCONS_00144292	0.26	0.28	0.14	0.64	0.3	0.5	0.4	0.38	0.38	0.0811766	0.0307629
ENSG00000249459	ZNF286B	2.3	2.94	3.64	1.84	3.36	1.95	1.63	2.4	2.41	0.222727	0.0307762
ENSG00000122912	SLC25A16	3.83	3.92	3.45	4.3	1.97	3.52	3.11	2.44	2.73	0.2972	0.030777
ENSG00000148429	USP6NL	5.58	5.58	6.1	6.02	6.17	5.69	5.31	4.84	5.52	0.287562	0.0307836
ENSG00000155097	ATP6V1C1	17.9	20.67	20.05	15.48	18.52	18.71	13.1	15.86	10.17	0.0130381	0.030802
ENSG00000132294	EFR3A	7.12	6.98	5.42	7.52	7.39	8.56	7.61	7.97	6.75	0.142753	0.0308135
ENSG00000182224	CYB5D1	16.89	16.02	17.85	15	14	14.17	12.45	14.4	13.92	0.0240783	0.0308333
ENSG00000221869	CEBPD	16.73	19.52	14.95	24.96	20.98	23.06	26.14	22.94	23.22	0.0587945	0.0309546
ENSG00000070831	CDC42	103.33	106.61	108.29	107.81	108.41	102.43	98.41	94.45	94.81	0.484032	0.0309765
ENSG00000176834	VSIG10	35.42	32.31	26.39	34.28	26.98	28.34	32.33	29.22	25.22	0.2746	0.0309817
ENSG00000102796	DHRS12	3.55	2.72	1.87	4.73	4.66	3.51	4.05	3.91	3.25	0.00942744	0.0309888
ENSG00000277363	SRCIN1	1.5	1.94	1.31	1.41	1.19	0.66	0.68	0.89	0.93	0.0683824	0.0311645
ENSG00000172171	TEFM	9.32	9.81	9.13	11.18	12.45	11.81	10.24	10.17	10.11	0.00610524	0.0311647
ENSG00000145996	CDKAL1	8.39	8.58	8.15	9.12	8.6	9.39	8.47	8.72	8.36	0.100807	0.0311663
ENSG00000158050	DUSP2	3.35	3.43	4.08	2.97	2.58	3.04	2.88	2.55	2.82	0.0305547	0.0311908
ENSG00000141639	MAPK4	9.26	11.24	11.31	8.53	7.98	7.48	7.37	8.3	6.55	0.05582	0.0312066
ENSG00000157653	C9orf43	0.54	0.44	0.42	0.17	0.41	0.31	0.23	0.29	0.27	0.119742	0.0312128
ENSG00000131725	WDR44	17.48	19.82	18.55	19.21	17.62	18.94	16.22	16.49	15.18	0.491827	0.0312785
ENSG00000110717	NDUFS8	191.43	185.53	192.07	184.19	189.8	162.72	175.2	171.42	186.23	0.194398	0.031327
ENSG00000105723	GSK3A	40.92	37.42	39.08	39.02	40.56	36.05	41.76	39.32	41.42	0.391427	0.031343
ENSG00000109756	RAPGEF2	17.13	17.97	16.4	18.57	15.11	15	12.29	16.23	12.2	0.26706	0.0313568
ENSG00000172081	MOB3A	10.81	10.77	16.35	10.04	14.03	11.96	13.67	13.8	17.46	0.400673	0.0313622
ENSG00000064932	SBNO2	44.3	41.76	40.2	50.85	46.41	45.4	47.84	49.8	50.08	0.00524696	0.03142
ENSG00000205221	VIT	2.57	2.65	2.99	3.12	3.91	3.82	3.12	3.73	4.49	0.0254438	0.0314602
ENSG00000122378	FAM213A	26.46	27.54	28.12	25.58	25.65	25.97	25.33	25.06	24.97	0.0257553	0.0315008
ENSG00000072803	FBXW11	32.35	29.35	31.55	27.4	25.84	26.91	26.31	26.64	23.98	0.00494659	0.031523
ENSG00000151532	VTI1A	7.57	7.51	6.51	9.29	7.12	6.87	7.17	6.47	5.84	0.22897	0.0315273
ENSG00000002549	LAP3	74.47	51.71	48.59	70.33	89.3	84.63	91.75	97.08	78.24	0.116003	0.0316223
ENSG00000128881	TTBK2	2.2	3.36	2.9	2.81	2.18	2.13	1.84	2.77	1.97	0.24806	0.0316248
ENSG00000179262	RAD23A	196.53	195.99	207.48	200.79	211.62	203.45	214.97	206.59	215.09	0.225744	0.0316526
ENSG00000115415	STAT1	157.85	168.35	160.63	301.52	291.49	264.75	360.1	376.51	314.64	0.423948	0.831673
ENSG00000144476	ACKR3	38.09	29.44	42.37	26.78	27.65	27.23	27.06	24.98	29.9	0.0705447	0.0316945
ENSG00000150938	CRIM1	34.86	38.55	31.32	32.43	37.56	34.57	31.08	33.57	29.53	0.488251	0.0316957
ENSG00000083168	KAT6A	5.99	6.58	6.33	4.49	5.2	6.26	5.04	4.68	5.45	0.0824377	0.031707
ENSG00000242689	CNTF	0.57	0.41	0.49	0.25	0.36	0.42	0.29	0.31	0.27	0.116681	0.0317071
ENSG00000178252	WDR6	53.73	62.49	82.09	43.34	41.17	44.89	45.45	44.68	58.97	0.0490972	0.0317253
ENSG00000011478	QPCTL	11.54	11.15	15.3	11.69	10.71	11.6	9.27	9.58	11.42	0.191127	0.0319634
ENSG00000123485	HJURP	13.48	11.26	12.05	12.79	11.73	12.98	14.64	14.15	13.76	0.336001	0.0319727
ENSG00000018408	WWTR1	22.3	26.39	22.37	21.82	19.41	21.89	20.7	22.43	20.05	0.173164	0.031986
ENSG00000138061	CYP1B1	1.39	1.2	1.01	2	1.7	1.81	1.7	1.93	1.41	0.00920982	0.0320135
ENSG00000140382	HMG20A	14.56	15.08	17.07	16.22	15.72	15.34	13.11	12.95	13.46	0.433693	0.0320284
ENSG00000175322	ZNF519	1.12	0.73	0.71	1.24	1.89	0.94	1.57	1.39	1.83	0.133283	0.0320534
ENSG00000175806	MSRA	8.1	6.33	7.62	7.59	8.84	7.88	8.4	7.1	8.46	0.246585	0.0320819
ENSG00000179627	ZBTB42	1.68	1.55	1.77	2.33	2.15	1.96	2.36	1.79	2.32	0.0405524	0.0320938
ENSG00000052841	TTC17	25.9	22.14	26.24	21.92	23.19	23.4	21.06	19.65	19.39	0.166926	0.0321376
ENSG00000078246	TULP3	21.57	20.8	21.05	19.95	19.9	18.66	20.44	20.05	19.16	0.0313341	0.0321659
ENSG00000184164	CRELD2	25.49	27.17	30.08	25.38	27.09	25.58	23.94	22.79	26.16	0.199274	0.0322444
ENSG00000196935	SRGAP1	5.87	6.21	5.55	6.4	6.48	6.41	6.81	6.55	6.46	0.0417231	0.0323203
ENSG00000185787	MORF4L1	558.3	554.98	521.65	532.72	546.27	543.67	541.67	508.17	486.51	0.398387	0.0323213
ENSG00000185201	IFITM2	529.25	493.05	442.3	510.62	567.92	528.42	607.3	567.67	602.26	0.144578	0.0323795
ENSG00000115295	CLIP4	2.82	3.49	2.79	2.22	3.12	3.25	1.92	1.81	2.07	0.325092	0.0324184
ENSG00000137842	TMEM62	27.45	24.07	21.32	30.12	34.2	29.01	31.22	34.7	29.25	0.0448445	0.0324661
ENSG00000101856	PGRMC1	44.08	44.4	49.56	45.66	40.77	44.99	40.26	41.01	42.01	0.183936	0.0325564
ENSG00000137752	CASP1	15.09	15.68	9	14.22	21.51	16.77	18.21	24.63	16.29	0.123205	0.0326141
ENSG00000163904	SENP2	23.53	20.39	22.02	22.56	18.93	24.13	19.7	18.57	16.87	0.466324	0.0326582
ENSG00000172482	AGXT	0.29	0.17	0.1	0.3	0.22	0.41	0.71	0.38	0.29	0.160021	0.0327009
ENSG00000164751	PEX2	19.46	19.58	20.02	17.25	15.26	20.72	17.52	16.58	18.9	0.156725	0.0327611
ENSG00000170485	NPAS2	13.63	15.5	14.43	11.82	13.79	12.29	11.2	13.83	13.55	0.00235407	0.0327977
ENSG00000256053	APOPT1	28.34	27.05	35.39	30.62	28.91	26.74	26.47	21.79	30.35	0.357507	0.0328871
ENSG00000187815	ZFP69	0.32	0.56	0.3	1.09	0.44	0.57	0.52	0.65	0.4	0.177983	0.0329258
ENSG00000079337	RAPGEF3	2.63	3.35	3.8	3.67	1.8	2.29	2.26	2.46	2.73	0.25712	0.0329414
ENSG00000196684	HSH2D	6.02	3.29	2.08	7.24	6.12	6.94	8.35	9.41	8.73	0.0530466	0.0329506
ENSG00000167543	TP53I13	35.38	34.82	40.74	35.9	34.59	29.18	31.58	32.17	34.12	0.218907	0.0330483
ENSG00000275740	RP11-449H3.3	2.11	1.65	0.79	1.84	2.39	1.66	2.29	2.17	1.2	0.170402	0.0330525
ENSG00000070814	TCOF1	40.49	37.45	40.26	39.23	41.31	39.08	42.06	39.52	44.05	0.403056	0.0332182
XLOC_027767	TCONS_00178623	2.58	1.66	1.78	1.53	1.45	2.06	1.65	1.27	1.28	0.244396	0.0332413
ENSG00000173273	TNKS	5.46	5.01	4.62	5.29	4.83	4.64	6.43	5.39	5.19	0.116486	0.0332651
ENSG00000184007	PTP4A2	126.84	130.02	116.28	147.72	136.68	142.11	134.59	141.51	120.43	0.0451935	0.0332872
ENSG00000134531	EMP1	42.02	49.56	40.27	52.14	51.45	40.29	53.91	54.81	55.52	0.162675	0.0333631
ENSG00000140688	C16orf58	57.63	55.52	55.87	60.26	54.03	54.62	62.16	58.35	63.3	0.490292	0.0334214
XLOC_009758	TCONS_00061296	0.95	0.79	1	1.09	0.88	1.13	1.15	0.86	1.19	0.0079101	0.0334215
ENSG00000113161	HMGCR	11.06	10.49	10.18	9.8	9.84	10.77	9.51	9.17	9.65	0.251862	0.0334562
ENSG00000096717	SIRT1	10.97	11.03	10.85	9.4	10.96	11.04	8.67	10.16	8.33	0.235579	0.0334931
ENSG00000130165	ELOF1	24.92	27.78	28.57	25.46	26.98	24.04	23.77	24.44	26.03	0.201458	0.0335632
ENSG00000013306	SLC25A39	199.95	190.77	196.7	185.16	176.64	174.29	189.49	181.29	193.11	0.0116367	0.0336744
ENSG00000106771	TMEM245	22.78	22.02	23.58	19.77	19.78	20.79	18.53	20.55	19.59	0.00361064	0.0337557
ENSG00000185885	IFITM1	522.14	328.36	422.56	466.7	667.69	557.07	674.66	688.42	610.69	0.172859	0.0338515
ENSG00000141027	NCOR1	65.85	58.83	53.66	57.38	68.41	58.41	57.84	48.56	50.17	0.37599	0.0339256
ENSG00000086717	PPEF1	4.49	4.55	2.73	5.36	3.76	3.66	5.53	5.87	5.22	0.305448	0.0339321
ENSG00000121281	ADCY7	9.17	7.07	6.34	8.28	8.57	9.67	11.92	13.28	14.42	0.197435	0.033973
ENSG00000167131	CCDC103	3.39	3	1.92	3.47	3.58	3.9	5.3	3.76	4.17	0.130899	0.0339756
ENSG00000068079	IFI35	130.68	88.55	63.48	102.52	145.42	133.4	159.8	162.23	149.83	0.198468	0.0340574
ENSG00000108984	MAP2K6	21.61	22.07	15.91	22.3	25.49	25.87	24.29	29.94	23.1	0.115132	0.0340902
ENSG00000154639	CXADR	8.06	9.21	10.4	8.38	8.64	8.03	6.7	6.24	6.42	0.192361	0.0340941
ENSG00000174206	C12orf66	3.4	3.53	4.67	4.66	3.7	4.65	2.72	3.3	4.14	0.179899	0.0341343
ENSG00000152484	USP12	8.66	9.27	9.43	6.81	7.92	9.31	7.82	7.56	8.67	0.0820933	0.0341612
ENSG00000118454	ANKRD13C	9.32	10.29	8.51	8.86	10.16	11.18	8.76	8.7	6.91	0.278634	0.0342258
ENSG00000144909	OSBPL11	6.6	7.15	6.22	6.23	7	6.85	6.25	6.11	5.31	0.457426	0.0342488
ENSG00000138496	PARP9	64.85	48.81	28.11	63.88	77.42	78.17	78.19	78.18	67.37	0.111041	0.0343125
ENSG00000127954	STEAP4	45.69	55.23	48.21	46.95	49.37	53.65	41.35	51.27	39.32	0.470043	0.0343142
ENSG00000261115	TMEM178B	0.78	0.92	1	2.15	1.64	0.99	0.71	0.72	0.8	0.112043	0.0343567
ENSG00000173715	C11orf80	7.97	7.06	6.92	7.53	7.11	9.04	8.54	8.65	8.58	0.269407	0.0343651
ENSG00000010810	FYN	38.54	32.72	47.86	32.32	30.98	33.96	30.86	28.95	36.96	0.0882876	0.0343814
ENSG00000160049	DFFA	31.87	30.63	35.09	28.79	26.31	26.38	30.12	28.06	30.59	0.0440037	0.0345039
ENSG00000150907	FOXO1	1.59	1.55	1.84	1.35	1.56	1.71	1.42	1.31	1.41	0.119511	0.0345385
ENSG00000131944	FAAP24	5.46	5.42	5.01	6.69	4.54	6.57	4.84	5.18	4.29	0.246236	0.034585
ENSG00000134324	LPIN1	4.33	4.18	5.11	4.39	3.64	3.91	3.68	3.14	4.73	0.131834	0.0345905
ENSG00000173702	MUC13	1.35	1.43	1.32	1.38	1.32	3.17	1.65	1.67	1.42	0.224331	0.0346162
ENSG00000111331	OAS3	151.48	109.97	70.24	146.37	186.86	176.87	191.84	180.12	181.44	0.108526	0.0346422
ENSG00000121858	TNFSF10	5.41	7.18	2.46	7.76	8.03	11.23	7.07	12.12	6.97	0.121076	0.0346499
ENSG00000111731	C2CD5	5.67	5.91	5.33	8.72	6.42	7.21	6.63	6.75	5.65	0.0660673	0.0346578
ENSG00000177034	MTX3	3.15	3.39	3.89	2.95	3.34	3.37	2.61	3	2.91	0.102628	0.0346886
ENSG00000170917	NUDT6	4.48	4.74	3.65	5.05	4.28	5.65	3.89	3.82	3.32	0.214023	0.0347479
ENSG00000146205	ANO7	0.8	0.65	0.86	0.71	0.87	0.61	0.72	0.62	0.77	0.399581	0.0347579
ENSG00000161267	BDH1	9.78	10.85	12.89	8.66	9.72	8.32	7.42	9.3	8.83	0.0931489	0.0347594
ENSG00000163644	PPM1K	4.14	3.34	2.86	4.92	3.22	3.47	4.54	4.41	4.06	0.132444	0.0347811
ENSG00000104760	FGL1	0.84	0.5	0.83	0.54	1.14	0.92	0.96	0.86	1.11	0.32579	0.034783
ENSG00000055332	EIF2AK2	54.07	39.98	37.83	53.32	60.06	68.75	67.94	71.2	52.91	0.106626	0.0348591
ENSG00000165097	KDM1B	6.78	6.91	7.72	6.62	6.78	7.17	6.62	6.6	7.26	0.0871625	0.0349767
ENSG00000187164	SHTN1	14.07	15.36	12.86	13.27	13.76	15.05	12.69	14.1	12.4	0.478562	0.0349935
ENSG00000100084	HIRA	17.84	16.29	12.14	19.36	19.81	19.45	21.61	20.29	20.54	0.0680981	0.0350058
ENSG00000100226	GTPBP1	35.79	32.06	33.67	37.17	37.97	35.66	41.07	35.62	42.93	0.0805631	0.0350706
ENSG00000162430	SEPN1	9.87	10.23	10.64	10.79	11.65	11.03	12.36	11.35	11.82	0.0461257	0.0351109
ENSG00000104388	RAB2A	53.59	42.44	42.41	41.03	54.12	43.69	45.25	38.05	39	0.493286	0.0351366
ENSG00000203797	DDO	0.46	0.29	0.44	0.64	0.83	0.78	0.79	0.76	0.6	0.0384844	0.0351403
ENSG00000105819	PMPCB	49.73	48.61	41.52	45.61	53.36	48.53	47.28	46.73	40.71	0.265794	0.0352478
ENSG00000042317	SPATA7	2.64	1.94	1.94	1.4	1.73	2.29	2.5	1.79	1.89	0.256756	0.0352484
ENSG00000157601	MX1	2.42	1.76	1.4	2.52	2.25	3.11	3.23	4.06	2.89	0.127334	0.0353166
ENSG00000100644	HIF1A	74.46	92.28	74.55	83.42	109.11	115.6	102.94	107.36	86.07	0.0737016	0.0353962
ENSG00000100625	SIX4	3.92	3.23	4.29	3.38	3.14	3.61	3	2.92	3.64	0.0668137	0.0354838
ENSG00000188725	SMIM15	20.81	18.34	17.17	16.91	17.94	19.53	19.61	15.77	13.58	0.377615	0.0356222
ENSG00000151304	SRFBP1	1.86	2.28	1.75	1.83	2.32	3.01	2.2	2.81	2.66	0.209263	0.0356641
ENSG00000170667	RASA4B	0.9	0.91	1.06	0.73	1.54	1.09	0.57	0.79	0.86	0.283457	0.0356669
ENSG00000076356	PLXNA2	2.88	2.34	3.4	3.45	2.98	2.54	3.67	2.67	3.8	0.416783	0.0356695
ENSG00000165752	STK32C	24.48	23.33	25.52	22.11	21.57	21.2	20.26	21.41	23.57	0.0337982	0.0356763
ENSG00000068885	IFT80	5.23	6.45	9.22	5.82	5.89	6.34	3.62	4.76	5.62	0.225087	0.035749
ENSG00000185483	ROR1	2.03	2.3	1.91	1.35	1.66	1.63	1.55	1.37	1.53	0.0262206	0.035908
ENSG00000146859	TMEM140	17.35	12.39	12.5	17.9	17.66	16.32	19.12	17.68	16.21	0.0739738	0.0359195
ENSG00000161544	CYGB	1.01	1.35	1.22	1.03	0.74	1.04	0.72	1.17	0.73	0.150678	0.0359231
ENSG00000102452	NALCN	4.62	4.63	4.13	4.61	3.73	4.24	4.13	3.58	3.66	0.245311	0.0359589
XLOC_031458	TCONS_00200873	0.7	0.55	0.42	1.99	0.83	1.14	1.4	0.83	0.79	0.0603529	0.0359592
ENSG00000251247	ZNF345	0.71	1.1	0.87	0.97	0.4	0.77	0.62	0.91	0.6	0.29309	0.036026
ENSG00000225932	CTAGE4	1.49	0.96	1.61	1.12	1.99	1.56	2.23	1.33	1.92	0.339271	0.0360369
ENSG00000204922	UQCC3	11.37	12.09	10.84	11.09	10.18	11.36	10.78	11.58	10.65	0.258863	0.0360673
ENSG00000174109	C16orf91	34.19	30.09	28.84	34.2	31.22	31.13	36.26	35.53	31.89	0.112258	0.0360972
ENSG00000171453	POLR1C	54.02	49.73	43.4	46.69	50.65	48.73	49.38	45.76	41.91	0.465776	0.0361539
ENSG00000119912	IDE	8.34	9.21	8.36	8.15	10.91	11.62	11.3	10.2	10.41	0.125977	0.0361647
ENSG00000205726	ITSN1	19.6	18	18.71	15.73	17.13	16.61	15.16	16.55	14.54	0.0600587	0.0361937
ENSG00000027075	PRKCH	3.46	2.83	3.21	3.65	2.7	3.35	2.05	2.14	2.61	0.285725	0.0362057
ENSG00000104894	CD37	0.66	1.01	1.1	0.88	0.41	0.75	0.53	0.71	0.7	0.210782	0.0362188
ENSG00000131507	NDFIP1	24.21	25.46	26.12	25.57	25.59	25.01	23.04	24.68	24.05	0.437682	0.0362628
ENSG00000178996	SNX18	1.76	2.49	1.87	2.13	2.09	2.04	2.01	2.57	2.08	0.429195	0.0362714
ENSG00000116514	RNF19B	19.06	18.8	10.01	24.26	22.02	23.61	24.56	26.12	23.88	0.0737247	0.0364049
ENSG00000224389	C4B	7.84	6.8	9.9	9.81	10.52	10.35	13.65	9.14	12.91	0.0813155	0.036407
ENSG00000128917	DLL4	0.12	0.17	0.17	0.14	0.2	0.1	0.18	0.19	0.23	0.426676	0.0364137
ENSG00000081923	ATP8B1	0.88	1.28	0.92	1.09	0.98	0.97	0.71	1	0.82	0.468758	0.0364217
ENSG00000110944	IL23A	1.11	0.52	0.66	1.72	1.17	1.21	1.4	1.43	1.42	0.0011559	0.0364448
ENSG00000153317	ASAP1	7.91	8.12	8.14	9.42	8.11	9.69	8.54	10.09	9.7	0.093125	0.0364505
ENSG00000130303	BST2	832.88	680.63	648.29	745.79	874.09	790.16	911.77	926.37	836.47	0.219223	0.0365363
ENSG00000204104	TRAF3IP1	4.97	4.14	5.42	3.99	3.59	4.46	4.68	3.55	4.55	0.0136682	0.0367257
ENSG00000198585	NUDT16	6.79	6.22	5.47	8.39	6.54	7.11	7.33	7.76	7.16	0.0557767	0.0367571
ENSG00000155858	LSM11	1.92	2.29	2.52	2.29	1.81	2.18	1.78	1.85	2.18	0.313064	0.0368397
ENSG00000134909	ARHGAP32	3.64	4.4	3.69	3.46	3.07	4.31	3.36	3.76	2.82	0.326218	0.0368783
ENSG00000114861	FOXP1	6.38	8.37	6.64	7.92	8.07	6.79	7.08	9.65	8.67	0.245411	0.0369392
ENSG00000113742	CPEB4	16.1	17.61	15.12	13.06	16.01	15.61	14.01	16.45	11.77	0.154766	0.037038
ENSG00000148737	TCF7L2	6.16	7.46	7.04	7.81	6.56	5.65	7.11	7.79	8.08	0.420967	0.0370727
ENSG00000204396	VWA7	2.16	1.51	2.27	1.23	1.68	1.11	1.77	0.91	1.21	0.129622	0.0372873
ENSG00000240583	AQP1	0.45	0.57	0.44	0.33	1.41	0.44	0.29	0.44	0.39	0.255051	0.0373186
ENSG00000137821	LRRC49	0.74	0.68	0.51	0.45	0.32	0.8	0.6	0.38	0.38	0.309564	0.0373645
ENSG00000105700	KXD1	59.61	59.4	59.62	62.13	57.22	56.81	62.32	64.89	61.87	0.336416	0.0375202
ENSG00000188707	ZBED6CL	5.66	5.12	5.43	6.12	5.58	5.59	5.8	5.56	5.75	0.0346211	0.0375302
ENSG00000130822	PNCK	0.23	0.27	0.34	0.47	0.32	0.94	0.53	0.68	0.47	0.10361	0.0375952
ENSG00000158458	NRG2	0.48	0.47	0.63	0.46	0.34	0.81	0.34	0.41	0.44	0.461153	0.0376758
ENSG00000109084	TMEM97	40.37	38.17	36.88	41.98	38.76	43.91	43.14	39.39	40.72	0.131781	0.0377153
ENSG00000177370	TIMM22	13.77	14.13	12.81	13.12	13.73	13.58	14.73	15.38	13.2	0.425445	0.0377323
ENSG00000151687	ANKAR	0.35	0.63	0.27	0.34	0.33	0.86	0.64	0.72	0.53	0.377896	0.0378308
ENSG00000025293	PHF20	28.06	29.43	31.01	28.47	26.54	27.85	24.6	28.07	26.62	0.121527	0.037833
ENSG00000159346	ADIPOR1	134.48	126.95	128.67	126.98	117.11	122.18	120.05	121.85	120.19	0.00762239	0.0378758
ENSG00000105939	ZC3HAV1	37.1	34.45	26.3	37.58	41.36	44.02	43.34	41.74	41.37	0.119008	0.0378818
ENSG00000166532	RIMKLB	16.4	16.23	16.89	16.28	16.08	16.06	15.44	13.4	15.12	0.127271	0.0378858
ENSG00000115368	WDR75	16.74	18.96	14.24	25.77	17.63	20.72	20.35	30.19	22.02	0.134313	0.0378937
ENSG00000182158	CREB3L2	22.12	23.02	22.55	21.84	23.78	21.95	18.9	17.26	20.44	0.465633	0.0379075
ENSG00000112561	TFEB	8.03	8.42	5.59	11.51	7.49	7.39	10.81	9.38	8.69	0.188157	0.0379222
ENSG00000113558	SKP1	233.98	256.89	251.04	241.76	232.64	232.25	219.86	229.13	208.3	0.178388	0.0380877
ENSG00000167378	IRGQ	2.71	3.34	3.4	5.29	3.45	4.1	3.58	4.33	5.48	0.134238	0.0381005
ENSG00000198740	ZNF652	2.38	2.5	2.7	2.46	3.25	2.59	2.22	2.21	2.23	0.22732	0.0381023
ENSG00000125246	CLYBL	4.31	3.64	3.86	3.75	3.74	4.44	4.93	3.83	4.37	0.45736	0.0381113
ENSG00000223802	CERS1	2.21	2.53	3.49	1.54	2.96	2.51	1.6	1.91	2.11	0.221068	0.0381131
ENSG00000126804	ZBTB1	8.96	8.69	7.21	7.77	7.98	9.7	6.94	7.87	6.22	0.440231	0.038235
ENSG00000275342	SGK223	2.04	2.28	1.98	2.44	2.22	1.83	2.08	2.37	2.02	0.372858	0.0383434
ENSG00000102054	RBBP7	214.48	209.18	213.34	203.81	217.41	216.56	204.83	200.22	192.42	0.483748	0.0383662
ENSG00000258653	RP5-1021I20.4	0.34	0.38	0.18	0.59	0.36	0.51	0.41	0.58	0.41	0.109981	0.0384594
ENSG00000064115	TM7SF3	86.73	78.18	59.9	101.92	95.82	85.63	96.25	85.08	78.04	0.0127989	0.0384856
ENSG00000100060	MFNG	0.22	0.51	0.39	0.96	0.21	0.43	0.64	0.64	0.7	0.326687	0.038514
ENSG00000072062	PRKACA	48.72	55.14	61.19	54.62	51.36	53.08	47.79	53.36	58.38	0.338664	0.0386408
ENSG00000105879	CBLL1	11.23	12.79	11.99	10.69	12.58	12	10.77	12.38	11.01	0.131361	0.0386691
ENSG00000171962	DRC3	0.92	0.61	0.8	1.03	0.82	0.63	1.03	0.97	1.13	0.351565	0.038673
ENSG00000112343	TRIM38	4.61	4.59	2.17	5.42	5.43	5.84	6.19	6.26	5.84	0.101212	0.0387183
XLOC_028406	TCONS_00182976	4.76	5.44	3.84	4.75	3.55	4.51	4.02	3.79	3.12	0.322931	0.0387503
ENSG00000116761	CTH	115.25	106.81	123.67	95.57	97.41	93.61	100.04	97.14	96.57	0.0403083	0.0389545
ENSG00000173085	COQ2	19.31	19.8	16.08	24.95	20.93	19.37	22.56	21.56	17.27	0.0617492	0.0390486
ENSG00000145016	RUBCN	11.95	11.53	9.27	13.01	14.81	13.22	14.84	14.03	15.36	0.0435219	0.0390571
ENSG00000127914	AKAP9	0.79	1.02	1.74	0.56	2.47	2.09	2.18	1.81	2.23	0.199709	0.0390766
ENSG00000165868	HSPA12A	2.22	2.31	2.13	2.57	2.44	2.35	2.11	1.97	1.91	0.0337062	0.0391023
ENSG00000198755	RPL10A	1194.91	1195.86	1216.07	1175.72	1158.61	1113.82	1136.64	1175.77	1148.86	0.0854419	0.0391929
ENSG00000174482	LINGO2	0.3	0.17	0.28	0.39	0.6	0.23	0.21	0.14	0.18	0.193145	0.0392607
ENSG00000113273	ARSB	3.45	4.1	4.37	4.53	4.86	4.46	4.12	4.52	4.59	0.0790919	0.039269
ENSG00000163138	PACRGL	8.42	5.56	7.33	5.91	6	6.79	6.23	4.89	5.22	0.210755	0.0392718
ENSG00000153046	CDYL	21.14	19.38	23.06	20.4	18.84	19.9	16.53	17.82	17.84	0.110433	0.0392888
XLOC_030500	TCONS_00195504	4.16	4.46	4.29	5.66	4.34	5.28	4.36	5.08	4.95	0.120175	0.0392961
ENSG00000060237	WNK1	51.2	51.55	50.41	50.62	54.82	59.8	47.36	45.96	48.67	0.14988	0.0394571
ENSG00000114784	EIF1B	50.3	50.38	57.89	49.13	49.13	46.19	48.15	46.38	51.39	0.155287	0.0394577
ENSG00000121542	SEC22A	19.66	25.5	22.3	20.48	21.18	18.81	18.83	22.73	20.18	0.140558	0.0394794
ENSG00000198355	PIM3	66.89	71.52	65.6	66.34	64.78	65.41	61.87	62.93	62.66	0.180818	0.0394928
ENSG00000109065	NAT9	14.32	13.11	13.93	12.65	10.37	10.06	11.08	10.45	12.97	0.0245467	0.0395222
ENSG00000181513	ACBD4	11.21	11.95	13.37	9.84	9.35	9.26	8.38	10.51	12.29	0.0383596	0.0395228
ENSG00000127804	METTL16	14.85	15.01	16.72	14.15	16.52	13.1	13.07	14.09	16.05	0.296406	0.0395401
ENSG00000111335	OAS2	57.77	38.91	19.16	56.07	71.78	69.46	75.42	76.13	75.12	0.108756	0.0395671
ENSG00000097007	ABL1	59.04	55.08	63.44	58.12	53.77	54.34	56.98	54.42	62.11	0.146019	0.039586
ENSG00000122068	FYTTD1	20.26	18.78	20.63	28.05	23.23	29.61	21.4	22.47	23.17	0.0174186	0.0397413
ENSG00000198890	PRMT6	15.02	15.85	13.6	18.58	16.21	15.65	16.29	16.77	16.06	0.0820865	0.0398763
ENSG00000104611	SH2D4A	28.45	26.2	27.87	27.46	30.46	25.56	30.12	27.26	30.88	0.44397	0.0399471
ENSG00000135318	NT5E	6.64	5.59	4.23	6.83	7	7.83	7.16	6.85	5.96	0.112211	0.0399497
ENSG00000067066	SP100	26.2	25.38	11.95	27.92	36.33	37.45	31.95	35.8	29.27	0.103712	0.0399558
ENSG00000182621	PLCB1	0.86	1.36	0.69	0.52	1.24	1.11	1.43	1.9	0.86	0.479139	0.0400561
ENSG00000132530	XAF1	7.48	5.64	3.66	7.85	12.48	13.82	11.23	15.57	8.69	0.0907871	0.040174
ENSG00000104613	INTS10	21.85	21.92	20.47	20.9	20.14	20.77	20.49	20.88	20.07	0.156108	0.0402689
ENSG00000145782	ATG12	24.8	18.36	27.65	17.81	21.72	22.08	18.32	15.78	18.94	0.221862	0.0402803
ENSG00000225190	PLEKHM1	6.7	4.72	5.16	4.94	3.8	5.3	3.39	3.1	3.88	0.131703	0.0404748
ENSG00000102699	PARP4	14.12	13.29	10.18	13.74	16.18	14.83	16.16	14.64	13.97	0.123381	0.0405155
ENSG00000084623	EIF3I	184.34	181.26	176.65	174.54	167.3	166.12	171.54	177.5	167.06	0.00617787	0.0405451
ENSG00000103121	CMC2	309.84	317.83	291.33	299.58	288.27	281.14	297.97	283.96	272.74	0.061295	0.0405462
ENSG00000263513	FAM72C	4.46	4.19	4.1	4.25	3.92	4.28	3.6	3.85	3.69	0.275945	0.0405547
ENSG00000087448	KLHL42	5.57	5.5	5.9	5.51	4.66	7.63	6.07	7.03	6.82	0.375473	0.0406723
ENSG00000090060	PAPOLA	29.77	30.7	27.71	24.54	27.3	33.1	28.19	27.29	22.57	0.386548	0.0407438
ENSG00000126822	PLEKHG3	27.57	28.74	29.94	31.43	25.12	25.44	24.5	26.37	29.05	0.322968	0.0407818
ENSG00000185946	RNPC3	4.45	6.62	4.36	2.9	3.7	4.18	2.51	4.87	3.8	0.0945556	0.040846
ENSG00000089234	BRAP	7.74	7.75	7.99	6.83	8.29	7.86	5.78	7.16	6.64	0.364613	0.0408472
ENSG00000105426	PTPRS	19.6	20.88	22.62	19.54	21.12	20.75	16.36	19.18	17.33	0.241365	0.0408725
ENSG00000156239	N6AMT1	9.57	9.13	8.37	8.47	7.25	7.87	7.15	8.35	6.9	0.0504821	0.0409827
ENSG00000123104	ITPR2	2.21	2.86	2.05	2.53	3.14	2.82	2.78	3.59	2.26	0.050382	0.0410059
ENSG00000175105	ZNF654	2.14	2.1	3.01	1.39	2.6	1.95	1.23	1.33	1.07	0.22822	0.0410553
ENSG00000151364	KCTD14	12.48	12.92	13.47	14.35	12.46	12.08	11.03	12.05	13	0.497569	0.041101
ENSG00000127585	FBXL16	17.14	17.34	19.75	20.88	18.45	18.73	18.15	17.71	21.04	0.225813	0.041107
ENSG00000242265	PEG10	26.08	29.49	23.81	24.11	23.52	22.94	21.74	21.61	21.09	0.099274	0.0411087
ENSG00000102125	TAZ	33.77	32.61	35.44	33.28	31.73	31.97	35.04	37.07	39.22	0.113313	0.0411281
ENSG00000147677	EIF3H	101.21	97.15	100.2	96.69	89.6	90.56	88.85	93.58	88.68	0.0198442	0.0411404
ENSG00000196967	ZNF585A	5.8	6.12	6.19	7.65	6.79	6.21	8.31	8.72	6.95	0.127362	0.0411435
ENSG00000137522	RNF121	22.15	24.12	24.73	21.34	20.67	22.57	20.42	20.3	19.02	0.0534451	0.0411806
ENSG00000183172	SMDT1	26.63	34.51	28.15	31.27	33.73	32.49	34.65	37.02	33.21	0.130196	0.0412104
ENSG00000112078	KCTD20	32.17	31.53	32.21	34.25	28.2	32.88	26.88	29.88	26.45	0.457963	0.0413131
ENSG00000140199	SLC12A6	7.87	6.85	6.92	8.06	6.69	7.99	8.18	7.15	7.63	0.210918	0.0413348
ENSG00000167733	HSD11B1L	3.41	4.04	5.05	4.51	3.94	3.11	4.06	4.47	6.27	0.378447	0.0413702
ENSG00000197037	ZSCAN25	3.97	3.72	4.67	3.95	3.49	3.81	4.9	4.04	5.8	0.140149	0.0413773
ENSG00000165832	TRUB1	8.89	11.87	10.06	10.68	10	10.84	8.25	11.48	8.91	0.425258	0.041539
ENSG00000161609	CCDC155	0.31	0.11	0.13	0.2	0.24	0.39	0.42	0.45	0.52	0.239937	0.0415787
ENSG00000198959	TGM2	60.28	53.71	38.09	63.65	71.92	69.28	72.73	69.04	70.29	0.0800425	0.0416192
ENSG00000107796	ACTA2	8.23	7.96	8.93	8.52	9.49	8.78	8.9	9.35	9.46	0.191848	0.0417386
ENSG00000100003	SEC14L2	2.56	4.1	5.8	4.67	3.53	3.09	3.62	4.84	7.86	0.402988	0.04183
ENSG00000133275	CSNK1G2	39.18	37.05	41.89	39.06	36.91	36.78	37.07	36.46	40.11	0.196834	0.0418619
ENSG00000135114	OASL	201.35	157.97	139.98	188.4	208.56	194.76	228.59	236.34	237.17	0.147485	0.0418715
ENSG00000130813	C19orf66	47.04	32.35	19.04	48.2	54.12	51.16	60.49	56.97	60.8	0.0906319	0.0419275
ENSG00000105520	PLPPR2	10.85	11.68	10.35	9.97	8.81	10.69	10.08	10.43	9.96	0.174162	0.0420105
XLOC_013802	TCONS_00089222	1.89	1.55	1.07	2.37	1.61	1.33	2.08	1.96	1.7	0.0794829	0.0420257
ENSG00000174672	BRSK2	4.16	4.15	4.95	3.2	3.95	3.24	3.7	2.5	3.61	0.0797027	0.0420567
ENSG00000109381	ELF2	14.84	14.49	14.64	14.82	16.02	15.08	13.28	13.88	12.5	0.14644	0.0421718
ENSG00000074935	TUBE1	17.34	16.63	16.14	17.53	16.74	16.07	14.89	14.62	15.46	0.211869	0.0422014
ENSG00000027869	SH2D2A	6.35	7.16	7.51	6.43	6.38	4.32	7.53	9.9	8.66	0.158154	0.042239
ENSG00000180447	GAS1	9.86	11.63	8.99	11.59	12.08	11.56	11.44	12.53	11.75	0.0619907	0.0423328
ENSG00000196812	ZSCAN16	3.69	3.87	3.28	3.67	3.59	4.21	3.1	3.18	3.09	0.312788	0.0424888
ENSG00000168062	BATF2	2.08	2.31	1.01	2.9	3.25	3.47	3.84	3.91	4.97	0.0583299	0.0425629
ENSG00000171723	GPHN	6.08	6.59	5.14	5.07	6.83	6.07	4.5	5.56	4.67	0.466861	0.0425774
ENSG00000172380	GNG12	50.98	56.4	49.3	52.14	49.72	53.91	48.39	53.66	43.01	0.467959	0.0425897
ENSG00000172123	SLFN12	3.03	2.71	2.41	4.41	4.34	4.94	4.26	4.58	2.96	0.0169743	0.0428477
ENSG00000165733	BMS1	6.62	7.1	6.02	6.61	7.61	7.53	6.91	7.22	6.44	0.135948	0.0430169
ENSG00000137959	IFI44L	14.74	9.85	9.89	13.96	21.18	19.37	18.23	20.04	15.26	0.109142	0.0430797
ENSG00000102471	NDFIP2	71.46	75.96	75.19	79.45	72.22	73.59	64.92	70.04	60.42	0.414678	0.0430881
ENSG00000006757	PNPLA4	31.98	32.74	30.39	29.89	29.14	26.08	35.72	34.23	32.05	0.0182333	0.0432573
ENSG00000159403	C1R	136.39	117.53	108.91	131.92	150.29	147.54	147.33	149.66	149.32	0.120077	0.0433535
ENSG00000064195	DLX3	0.23	0.19	0.33	0.23	0.33	0.24	0.3	0.42	0.47	0.413276	0.0434466
ENSG00000143319	ISG20L2	33.46	35.41	34.43	31.71	30.1	27.64	31.36	32.23	33.51	0.0454378	0.0434576
ENSG00000101665	SMAD7	10.24	9.77	9.34	8.25	7.69	9.07	7.83	7.6	8.69	0.0666772	0.0435299
ENSG00000180329	CCDC43	23.34	23.69	24.07	23.55	20.85	21.08	21.8	18.01	18.72	0.107096	0.0437613
ENSG00000168575	SLC20A2	9.65	12.24	12.22	9.88	10.73	13.24	8.96	9.72	10.38	0.459135	0.0438127
ENSG00000157741	UBN2	1.97	2.38	1.35	1.59	1.12	1.42	0.98	1.3	1.06	0.156108	0.043847
ENSG00000134321	RSAD2	4.33	3.28	2.82	4.57	4.91	5.18	6.06	6.96	4.19	0.0757449	0.0438725
ENSG00000117298	ECE1	63.64	60.53	59.94	63.36	66	64.34	67.31	64.21	68.75	0.105957	0.0439337
ENSG00000123066	MED13L	3.07	2.72	2.77	3.2	4.58	2.97	2.51	2.56	2.4	0.162869	0.043977
ENSG00000182220	ATP6AP2	77.94	80.43	89.52	77.21	76.57	81.5	69.99	74.02	72.43	0.092384	0.043978
ENSG00000131368	MRPS25	59.22	58.3	52.27	51.81	48.18	48.03	51.98	49.21	49.86	0.0253465	0.0441786
ENSG00000131759	RARA	13.62	16.39	13.56	14.16	13.4	14.57	12.08	13.72	12.73	0.370171	0.0442091
ENSG00000076685	NT5C2	58.25	49.83	50.33	54.64	60.78	59.51	60.51	58.21	58.37	0.176419	0.0442117
ENSG00000140948	ZCCHC14	12.37	13.15	11.73	11.41	10.52	11.81	10.81	10.98	11.14	0.138238	0.0443464
ENSG00000165338	HECTD2	2.66	3.36	3.51	2.93	3.52	3.76	3.44	3.93	3.72	0.0107787	0.0444901
ENSG00000162733	DDR2	0.86	0.74	1.08	0.5	0.94	0.6	0.62	0.62	0.68	0.207881	0.0445099
ENSG00000107186	MPDZ	3.52	4.68	3.51	4.34	4.84	4.2	3.28	3.81	2.91	0.0550888	0.0445099
ENSG00000142197	DOPEY2	4.38	4.21	6.28	5.68	4.37	3.95	3.55	2.63	3.57	0.40604	0.0445114
ENSG00000277224	HIST1H2BF	0.6	0.75	0.6	0.45	0.53	0.7	0.53	0.64	0.39	0.22597	0.0445367
ENSG00000221890	NPTXR	0.36	0.3	0.54	0.47	0.5	0.47	0.29	0.19	0.33	0.209809	0.0445367
ENSG00000240065	PSMB9	45.3	44.28	27.83	53.67	62.83	58.66	59.05	60.13	63.45	0.0487149	0.0445819
ENSG00000136436	CALCOCO2	70.68	66.48	66.34	56.77	68.89	71.36	65.71	65.1	62.97	0.375153	0.0445927
ENSG00000265763	ZNF488	1.04	1.09	0.86	1.14	0.51	0.93	0.63	0.53	0.71	0.300311	0.0446703
ENSG00000106852	LHX6	0.85	0.74	1.29	1.01	0.61	0.47	0.41	0.59	0.72	0.23028	0.0447303
ENSG00000064199	SPA17	10.21	11.88	11.18	10.3	9.72	8.85	9.5	10.55	8.87	0.100382	0.0447688
ENSG00000152242	C18orf25	8.95	9.6	8.4	9.92	7.25	8.72	7.69	9.23	6.98	0.380582	0.0447802
ENSG00000029363	BCLAF1	19.93	20.94	16.57	17.36	27.33	25.27	22.65	27.53	19.29	0.174286	0.0448855
ENSG00000099814	CEP170B	10.62	11.36	11.99	10.33	10.18	10.18	10.23	9.89	10.91	0.0656722	0.0450072
ENSG00000107262	BAG1	285.57	321.39	247.97	404.28	351.07	358.91	340.69	344.61	270.2	0.0467532	0.0450144
ENSG00000075785	RAB7A	153.6	144.13	151.4	148.03	151.03	148.43	141.56	141	141.95	0.449376	0.0450662
ENSG00000064999	ANKS1A	4.62	4.77	4.87	4.35	4.33	4.03	4.29	4.66	4.7	0.0461779	0.0451812
ENSG00000019549	SNAI2	6.69	7.18	7.72	7.51	6.08	5.85	6.03	6.08	5.67	0.232401	0.0451932
ENSG00000138442	WDR12	23.69	30.79	24.99	19.12	20.62	19.72	15.38	20.46	22.33	0.0316065	0.045271
ENSG00000145088	EAF2	4.74	4.67	3.72	4.61	5.03	4.54	5.68	4.96	4.25	0.165047	0.0453153
ENSG00000157870	FAM213B	9.89	7.75	10.12	8.77	8.48	9.79	7.6	7.02	7.28	0.349062	0.0453281
ENSG00000101132	PFDN4	34.01	31.26	25.48	25.77	27.25	31.11	27.64	29.6	20.67	0.322316	0.0453616
ENSG00000198814	GK	6.47	7.23	6.39	8.55	7.65	6.69	5.62	6.77	6.12	0.122837	0.0454813
ENSG00000239697	TNFSF12	5.62	6.07	5.88	5.87	6.51	6.37	7.88	6.68	7.43	0.0164259	0.0455272
ENSG00000069812	HES2	2.6	2.63	1.98	2.02	1.8	2.04	2.21	1.63	1.55	0.115801	0.0456243
ENSG00000169288	MRPL1	9.86	12.32	8.51	7.94	10.17	11.19	9.5	11.64	7.32	0.398052	0.0457221
ENSG00000038358	EDC4	27.44	28.99	26.49	27.18	24.87	30.53	28.38	29.89	28.74	0.483008	0.0457608
ENSG00000132357	CARD6	10.14	9.7	8.75	11.13	10.79	12.17	10.72	11.96	10.86	0.0735988	0.045763
XLOC_005097	TCONS_00030172	0.49	0.54	0.51	0.22	0.68	0.51	0.82	0.68	0.64	0.376609	0.0457673
ENSG00000065809	FAM107B	44.98	46	47.07	43.7	39.41	47.73	38.09	42.68	35.64	0.191448	0.0457702
ENSG00000140987	ZSCAN32	5.72	5.75	6.11	6.38	6.16	7.73	9.11	6.88	7.83	0.0677966	0.0457808
ENSG00000101546	RBFA	21.97	21.84	21.47	19.44	21.4	18.56	20.22	21.28	20.54	0.0626423	0.0458281
ENSG00000169118	CSNK1G1	7.33	6.56	5.78	7.79	5.86	6.49	6.26	5.67	5.51	0.376437	0.0459256
ENSG00000106780	MEGF9	3.46	4.11	3.04	3.4	3.63	3.59	2.93	3.2	2.77	0.496059	0.045938
ENSG00000171067	C11orf24	22.73	23.05	24.34	19.11	23.07	20.09	22.26	21.8	22.56	0.0940903	0.0459582
ENSG00000131381	RBSN	12.29	10.98	10.41	12.43	10.99	11.34	10.9	10.19	9.99	0.168518	0.0459594
ENSG00000132356	PRKAA1	43.26	40.07	35.52	40.58	40.89	49.01	36.14	37.97	31.35	0.256331	0.0460155
ENSG00000134285	FKBP11	1.92	1.35	2.79	1.03	1.72	1.74	0.86	0.95	1.27	0.182019	0.0462291
ENSG00000100234	TIMP3	67.82	61.08	75.98	55.97	57.61	54.95	55.19	56.65	58.77	0.0697153	0.0462384
ENSG00000136999	NOV	10.81	11.09	11.2	12.66	14.35	12.66	13	12.26	11.89	0.0285207	0.0463255
ENSG00000090989	EXOC1	3.9	3.52	2.8	2.9	3.86	3.62	3.28	3.33	2.04	0.465458	0.0463489
ENSG00000155760	FZD7	1.23	1.21	1.46	1.25	1.18	1.31	1.13	0.81	1.1	0.200608	0.0464377
ENSG00000051825	MPHOSPH9	6.33	8.71	3.78	7.52	7.12	8.23	6.87	10.44	5.94	0.260082	0.0464483
ENSG00000115159	GPD2	17.87	20.87	17.98	20.33	18.94	16.78	14.35	18.28	17.08	0.44225	0.0464678
ENSG00000196678	ERI2	10	11.02	7.81	9.1	12.67	10.45	11.67	11.47	8.91	0.198025	0.0465095
ENSG00000105173	CCNE1	10.07	10.74	13.29	10.47	9.96	8.56	9.44	9.02	10.86	0.193355	0.0465524
ENSG00000110651	CD81	140.43	146.93	168.16	132.07	145.77	135.28	137.53	139.88	157.41	0.139432	0.0465691
XLOC_000202	TCONS_00001193	0.39	0.21	0.65	1.03	0.77	0.36	1.08	1.09	0.87	0.20763	0.0466073
ENSG00000142556	ZNF614	0.98	1.21	0.94	0.69	1.04	0.91	0.85	0.72	0.61	0.080875	0.046631
ENSG00000147689	FAM83A	80.92	85.93	82.38	95.75	86.78	87.65	92.4	90.03	98.36	0.116296	0.0467094
XLOC_004475	TCONS_00025853	2.51	2.47	2.84	2.14	1.89	2.46	1.46	2.12	2.32	0.0114914	0.0467562
ENSG00000171346	KRT15	0.69	0.73	0.68	0.93	0.81	1.03	0.93	1.69	1.42	0.0521374	0.0467686
ENSG00000120690	ELF1	12.59	11.1	10	10.37	11.11	12.1	10.4	10.5	8.61	0.489609	0.046771
ENSG00000175697	GPR156	0.52	0.64	0.82	0.44	0.44	0.31	0.25	0.48	0.31	0.0880721	0.0468603
ENSG00000149503	INCENP	13.28	13.04	14.3	15.51	13.57	14.79	14.69	18.56	18.27	0.0997306	0.0468677
ENSG00000172936	MYD88	10.2	10.34	5.89	10.05	11.77	11.8	14.61	11.99	12.25	0.158757	0.0469212
ENSG00000130313	PGLS	140.12	135.9	129.63	142.53	137.3	135.04	147.07	151.98	155.04	0.0626521	0.0469224
ENSG00000176148	TCP11L1	7.94	6.65	8.37	7.95	7.04	6.89	6.86	5.7	5.86	0.296303	0.0469685
ENSG00000100490	CDKL1	4.24	3.14	4.52	2.44	10.85	4.78	2.06	2.6	2.49	0.275156	0.0470616
ENSG00000110057	UNC93B1	25.56	21.33	17.23	26.61	26.81	26.43	28.25	31.81	27.92	0.0779784	0.0471525
ENSG00000117676	RPS6KA1	38.48	41.16	41.97	43.96	45.67	39.25	35.48	39.85	37.18	0.223881	0.0472146
ENSG00000164466	SFXN1	41.12	41.77	40.28	46.54	38.36	39.35	38.95	37.75	33.03	0.451818	0.0472416
ENSG00000155506	LARP1	46.96	50.39	48.88	50.77	49.47	48.75	44.95	46.83	47.83	0.296835	0.0472486
ENSG00000113575	PPP2CA	131.24	127.65	123.93	128.28	126.36	130.88	124.09	120.86	106.6	0.398293	0.0472709
ENSG00000156052	GNAQ	5.62	6.57	7.4	7.43	5.7	8.02	4.43	5.83	5.08	0.285735	0.0473423
ENSG00000213722	DDAH2	36.27	37.65	37.43	40.52	34.15	36.15	39.1	39.01	42.22	0.472933	0.0473823
ENSG00000113615	SEC24A	7.88	8.49	8.38	6.59	7.76	7.38	7.2	7.9	6.8	0.012421	0.047578
ENSG00000100519	PSMC6	33.15	34.71	28.39	35.99	33.13	35.34	32	31.9	27.29	0.191094	0.0476789
ENSG00000039319	ZFYVE16	3.27	4.24	3.79	3.42	5.62	4.9	4.3	4.76	5.59	0.0712161	0.0476919
ENSG00000133321	RARRES3	45.45	40.81	29.73	40.61	49.71	47.69	49.66	50.24	45.11	0.19173	0.047793
ENSG00000105971	CAV2	32.84	31.45	32.72	26.17	27.06	26.3	23.53	28.86	21.93	0.00750378	0.0477979
ENSG00000256525	POLG2	4.63	4.87	6.03	5.72	4.15	5.95	3.85	4.17	4.18	0.436035	0.0478931
ENSG00000145002	FAM86B2	2.87	2.14	2.56	4.71	3.12	3.87	4.9	2.93	3.39	0.0157742	0.0479917
ENSG00000113231	PDE8B	14.86	19.21	16.47	15.99	14.98	16.9	13.4	14.29	13.77	0.324803	0.0479935
ENSG00000116525	TRIM62	0.63	0.5	0.88	0.33	0.69	0.82	0.74	0.94	1.19	0.363734	0.0480939
ENSG00000241935	HOGA1	0.67	0.54	0.89	0.7	1.72	0.76	0.93	0.79	1.53	0.237462	0.0481118
ENSG00000114790	ARHGEF26	0.16	0.34	0.25	0.27	0.54	0.43	0.23	0.36	0.29	0.0133944	0.0482188
ENSG00000102910	LONP2	21.41	20.75	20.15	20.68	19.64	20.84	19.38	20.26	18.6	0.278243	0.0482293
ENSG00000089127	OAS1	308.55	229.55	152.48	290.55	348.87	336.62	359.96	393.2	366.02	0.125697	0.0482871
ENSG00000183486	MX2	44.52	18.48	16.02	32.09	58.39	53.21	56.23	66.46	51.33	0.166334	0.0482946
ENSG00000121769	FABP3	1.34	2.16	2.36	1.77	1.75	1.53	1.2	1.63	1.77	0.270923	0.048361
ENSG00000112378	PERP	65.73	78.05	67.28	82.52	74.6	76.9	70.21	79.72	73.88	0.162798	0.0483808
ENSG00000175893	ZDHHC21	0.53	0.48	0.55	0.58	0.88	0.8	0.97	0.72	1.36	0.0739936	0.0484351
ENSG00000134827	TCN1	0.68	0.23	0.32	0.77	0.88	0.42	0.74	0.48	0.51	0.134686	0.048504
ENSG00000262484	CCER2	0.24	0.54	0.42	0.49	0.2	0.36	0.15	0.24	0.26	0.398416	0.0485733
ENSG00000146374	RSPO3	0.21	0.33	0.14	0.23	0.16	0.27	0.32	0.37	0.3	0.473139	0.0485862
ENSG00000156482	RPL30	1065.38	1040.2	1078.23	1031.37	1064.7	1001.44	1029.49	1000.17	982.53	0.215235	0.0486618
ENSG00000128335	APOL2	46.35	39.03	18.34	48.25	54.58	55.43	58.05	56.65	54.48	0.108959	0.0487282
ENSG00000214078	CPNE1	68.18	60.02	61.59	64.28	64.9	66.22	70.43	67.62	71.15	0.291727	0.048799
XLOC_029594	TCONS_00190037	0.57	0.33	0.56	0.31	0.31	0.45	0.16	0.22	0.31	0.102206	0.048804
ENSG00000076067	RBMS2	17.33	15.12	14.51	16.3	16.17	17.36	18.14	18.51	17.8	0.241673	0.0488832
ENSG00000184226	PCDH9	0.17	0.31	0.23	0.49	0.26	0.25	0.34	0.47	0.27	0.242016	0.0490487
ENSG00000166439	RNF169	4.28	3.84	3.91	4.28	4.01	4.53	3.79	3.67	3.69	0.145265	0.0490913
ENSG00000125656	CLPP	83.89	85.3	92.03	90.16	86.55	81.38	86.47	87.57	98.17	0.42726	0.0491154
ENSG00000113272	THG1L	8.56	8.39	6.47	9.42	9.25	9.14	10.51	8.84	8.13	0.0680632	0.0492427
ENSG00000075292	ZNF638	11.25	11.46	9.77	13.27	14.47	15.89	12.96	16.52	12.09	0.0474872	0.0493818
ENSG00000186088	GSAP	0.49	0.41	0.18	0.25	0.33	0.26	0.63	0.53	0.51	0.238884	0.0494476
ENSG00000003509	NDUFAF7	8.72	8.32	10.34	8.19	8.45	7.47	5.59	7.05	5.4	0.176881	0.0494599
ENSG00000065883	CDK13	7.99	7.56	7.61	7.2	6.38	7.3	7.06	7.33	6.62	0.0471696	0.049483
ENSG00000147027	TMEM47	1.21	1.57	1.27	1.84	1.36	1.26	1.09	1.54	1.14	0.321793	0.0495574
ENSG00000173153	ESRRA	39.83	41.61	46.09	35.23	44.41	35.87	38.48	35.86	40.48	0.19963	0.0495867
ENSG00000197238	HIST1H4J	7.25	9.72	6.13	8.89	5.54	8.9	4.45	9.07	3.97	0.487415	0.0495933
ENSG00000107560	RAB11FIP2	4.7	5.73	5.34	4.01	4.54	5.56	3.77	5.48	4.24	0.156007	0.0498043
ENSG00000126698	DNAJC8	83.12	78.09	81.79	82.13	79.46	77.26	73.1	75.77	72.21	0.252227	0.0498043
ENSG00000204264	PSMB8	195.91	182.92	132.85	200.31	208.37	209.1	226.72	227.93	227.8	0.119548	0.0498063
ENSG00000001631	KRIT1	8.64	11.38	9.11	6.65	10.44	8.1	8.4	10.43	8.5	0.0303049	0.0498086
ENSG00000102226	USP11	22.84	24.66	20.91	26.87	26.26	27.02	28.89	26.85	29.86	0.0476565	0.0498107
ENSG00000135069	PSAT1	380.51	372.21	374.63	362.81	358.08	358.51	349.14	364.91	351.08	0.00207485	0.0498347
ENSG00000275993	CH507-42P11.8	139.5	131.21	160.9	125.65	123.04	119.54	126.23	125.35	138.78	0.087699	0.0498378
ENSG00000168505	GBX2	0.64	0.31	0.61	0.35	0.36	0.58	0.35	0.11	0.54	0.236507	0.0499067
ENSG00000184428	TOP1MT	8.35	8.86	8.9	9.07	9.15	9.78	9.29	10.34	11.91	0.0350353	0.0500073
ENSG00000050327	ARHGEF5	10.16	11.3	9.31	10.83	11.66	10.17	11.85	11.93	10	0.0247775	0.0500401
ENSG00000160953	MUM1	10.64	11.75	12.75	11.82	10.49	9.29	10.47	11.37	12.11	0.235717	0.0500551
ENSG00000018699	TTC27	15.36	13.41	13.19	11.63	12.89	13.69	13.2	12.49	12.42	0.215057	0.0501882
ENSG00000188321	ZNF559	2.22	2.54	3.62	3.18	1.95	3.13	1.29	2.22	2.28	0.471808	0.0501926
ENSG00000171522	PTGER4	2.49	2.22	1.63	2.16	2.83	1.71	3.09	2.48	1.84	0.351143	0.0502613
ENSG00000125347	IRF1	27.23	33.99	18.87	36.7	33.96	36.79	39.21	40.88	42.1	0.110322	0.0503816
ENSG00000053254	FOXN3	13.13	12.37	14.47	12.11	12.08	13.75	11.6	11.22	11.06	0.0428067	0.0504255
ENSG00000026950	BTN3A1	19.63	14.36	16.53	21.79	21.9	24.01	21.74	23.75	24.02	0.0424132	0.0504858
ENSG00000050130	JKAMP	24.89	27.43	28.38	23.94	25.08	26.53	22.37	23.68	20.48	0.0262452	0.0505266
ENSG00000138375	SMARCAL1	9.83	8.48	9.5	9.87	8.97	8.72	9.6	8.21	9.44	0.421727	0.0506029
ENSG00000161010	C5orf45	10.33	8.03	11.84	14.36	8.03	6.91	8.93	7.69	10.32	0.459198	0.0506418
ENSG00000129194	SOX15	16.04	14.04	15.91	16.58	17.32	13.91	16.8	16.16	19.07	0.364571	0.0506669
ENSG00000026036	RTEL1-TNFRSF6B	1.29	1.04	0.7	0.8	0.67	1.04	1.69	1.6	0.83	0.286122	0.0507207
ENSG00000113389	NPR3	3.37	3.86	3.41	3.48	3.25	3.96	3.25	3.74	3.1	0.482582	0.0507471
ENSG00000171017	LRRC8E	5.02	5.55	5.78	4.11	4.56	4.72	4.49	4.12	3.6	0.000961654	0.0507912
ENSG00000090554	FLT3LG	1.16	3.19	1.09	1.85	2.54	3.14	1.85	3.63	2.51	0.232869	0.050853
ENSG00000003393	ALS2	3.62	5.03	4.81	3.79	4.41	3.81	3.39	4.03	3.8	0.147905	0.0508848
ENSG00000113580	NR3C1	18.79	20.09	19.54	17.08	18.29	19.96	18.16	17.26	17.3	0.145753	0.0508898
ENSG00000135736	CCDC102A	3.38	4.64	2.89	5.66	4.36	5.32	6.54	5.51	4.64	0.117564	0.0509249
ENSG00000105732	ZNF574	4.53	4.27	4.49	4.19	4.57	4.87	4.45	4.25	4.44	0.334097	0.0509867
ENSG00000140105	WARS	529.77	434.57	362.42	507.13	573.39	547.22	585.94	574.8	587.17	0.125878	0.0510488
ENSG00000163956	LRPAP1	86.54	83.75	100.16	87.26	78.69	78.52	82.02	79.22	88.43	0.162709	0.0510665
ENSG00000237651	C2orf74	8.33	11.24	7	9.14	10.2	10.46	7.08	8.9	6.34	0.248172	0.0512231
ENSG00000105467	SYNGR4	0.41	0.73	0.14	1.41	0.58	0.66	0.96	0.85	0.61	0.152186	0.0512507
ENSG00000166797	FAM96A	98.43	109.26	100.53	109.47	100.82	108.41	96.4	99.99	92.03	0.310625	0.0513474
ENSG00000135999	EPC2	4.82	5.58	4.72	5.37	6.2	6.06	5.63	6.5	4.92	0.0401264	0.0514053
ENSG00000100902	PSMA6	277.09	261.07	233.63	270.61	271.25	262.63	285.61	300.3	265.76	0.199474	0.0515405
ENSG00000197816	CCDC180	0.63	0.54	0.54	0.79	0.71	0.85	0.72	0.71	0.86	0.0239234	0.0515583
ENSG00000119599	DCAF4	8.27	7.45	8.48	7.27	10.35	7.55	10.3	8.27	9.22	0.412644	0.051568
ENSG00000103260	METRN	17.95	21.34	19.45	21.52	14.21	16.02	17.24	18.2	17.19	0.267537	0.0515777
ENSG00000169031	COL4A3	3.14	2.21	2.68	2.37	2.69	2.56	2.61	1.98	2.5	0.370685	0.0515871
ENSG00000173230	GOLGB1	3.95	4.37	5.89	2.76	6.97	7.38	6.56	11.43	8.7	0.240361	0.0515957
ENSG00000188060	RAB42	38.79	34.26	33.62	45.57	45.16	45.57	49.07	48.67	36.89	0.0122904	0.0516047
ENSG00000164032	H2AFZ	457.6	500.92	456.98	454.7	471.57	444.58	448.84	475.03	445.71	0.0971278	0.0516213
ENSG00000174989	FBXW8	2.26	2.14	1.88	2.72	2.59	2.65	2.85	2.71	2.01	0.0167143	0.0516615
ENSG00000171606	ZNF274	13.24	12.03	11.63	12.12	11.67	13.2	10.09	11.1	10.05	0.486757	0.0517042
ENSG00000136161	RCBTB2	0.67	1.13	0.53	1.06	0.69	0.5	0.47	0.71	0.4	0.460773	0.0517573
ENSG00000163393	SLC22A15	6.31	5.73	5.48	5.66	6.3	5.31	5.33	5.35	5.11	0.41809	0.0518255
ENSG00000110375	UPK2	0.43	0.29	0.37	0.74	0.17	0.11	0.17	0.18	0.28	0.452118	0.0518536
ENSG00000113013	HSPA9	406.02	345.89	373.91	331.41	366.23	347.54	350.1	333.56	332	0.215088	0.0518628
ENSG00000100596	SPTLC2	6.03	5.38	4.71	7.74	5.36	5.15	6.75	5.92	6.34	0.151788	0.0519396
ENSG00000164187	LMBRD2	2.97	4.08	4.54	3.7	4.19	4.94	4.27	4.36	5.58	0.0736792	0.0519895
ENSG00000106976	DNM1	0.34	0.39	0.27	0.28	0.35	0.24	0.49	0.71	0.37	0.0195062	0.0519997
ENSG00000168066	SF1	147.33	132.86	130.23	137.72	154.71	143.31	155.14	154.23	163.15	0.231463	0.0520277
ENSG00000177125	ZBTB34	2.5	2.3	2.89	2.27	1.86	2.21	1.84	2.11	2.02	0.0371389	0.0520469
ENSG00000215301	DDX3X	122.44	130.37	111.7	106.56	119.74	123.49	115.55	116.59	86.31	0.310754	0.0522909
ENSG00000125744	RTN2	2.25	3.17	3.07	9.86	2.62	2.47	5.14	4.26	4.18	0.256338	0.0523146
ENSG00000115762	PLEKHB2	32.55	32.75	34.56	31.12	31.57	31.79	31.87	29.69	32.37	0.0340592	0.0523288
ENSG00000104067	TJP1	12.86	11.66	11.9	13.9	13.65	15.25	13.57	13.5	12.59	0.0433182	0.0523666
ENSG00000005156	LIG3	20.54	19.57	20.21	20.67	22.91	17.49	17.21	18.74	18.22	0.449759	0.0524814
ENSG00000175449	RFESD	2.58	2.43	3.1	2.69	3.51	2.89	4.92	3.17	4.17	0.244145	0.0525387
ENSG00000088812	ATRN	19.69	18.51	21.69	18.83	17.76	17.86	17.81	17.39	17.88	0.107046	0.0525725
ENSG00000106153	CHCHD2	555.71	539.55	587.22	528.71	531.44	506	525.82	532.62	554.37	0.109397	0.0525759
ENSG00000184349	EFNA5	1.55	1.64	2.36	2.65	2.33	1.89	1.91	2.64	2.76	0.224064	0.0526015
ENSG00000106031	HOXA13	5.31	5.19	6.45	6.23	4.31	5.91	4.1	4.84	4.83	0.395627	0.0526537
ENSG00000100578	KIAA0586	2.91	4.44	2.87	4.16	4.04	5.33	5.28	5.85	3.46	0.157301	0.0526756
ENSG00000171456	ASXL1	37.75	37.45	38.19	32.48	23.95	30.62	36.56	31.85	32.87	0.0349463	0.0526892
ENSG00000138398	PPIG	6.17	9.37	8.58	8.25	11.43	12.5	10.42	10.54	10.82	0.0244294	0.052794
ENSG00000102981	PARD6A	7.67	10.08	8.63	8.89	7.57	6.96	6.61	6.2	6.57	0.237269	0.0528404
ENSG00000135596	MICAL1	1.67	1.61	1.44	2.02	2.4	1.51	2.15	1.71	1.85	0.0970694	0.0528548
ENSG00000127054	CPSF3L	39.99	40.81	40.76	43.76	34.34	38.51	36.67	35.82	39.62	0.317247	0.0528629
ENSG00000163297	ANTXR2	0.3	0.5	0.81	0.35	0.28	0.58	0.21	0.43	0.6	0.141598	0.0530149
ENSG00000221963	APOL6	11.12	10.08	4.55	12.42	13.54	14.75	13.93	14.49	13.85	0.101939	0.0530252
ENSG00000099341	PSMD8	147.21	134.39	139.6	139.18	134.03	131.67	136.19	131.77	132.73	0.0827635	0.0530753
ENSG00000114473	IQCG	2.25	3.08	3.02	2.84	2.54	2.43	1.9	1.91	2.46	0.343156	0.0530756
ENSG00000196550	FAM72A	4.82	5.53	4.14	4.17	3.76	4.05	4.15	4.9	4	0.116165	0.0531483
ENSG00000177302	TOP3A	38.16	39.5	43.82	40.88	38.73	45.15	35.75	36.2	36.35	0.196922	0.0531531
ENSG00000258102	MAP1LC3B2	0.35	0.37	0.87	0.92	0.74	1.29	0.29	0.13	0.73	0.0085607	0.0531555
ENSG00000174808	BTC	0.61	0.42	0.36	0.77	0.81	1.17	1.78	1.14	0.64	0.0700506	0.0532027
ENSG00000108797	CNTNAP1	3.31	3.05	3.26	3.45	3.56	3.27	4.06	3.49	4.78	0.139812	0.0532576
ENSG00000105135	ILVBL	83.09	82.8	95.02	81.39	75.48	79.08	79.14	74.69	80.1	0.0911312	0.0532875
ENSG00000100211	CBY1	29.89	33.05	33.86	31.89	28.97	30.5	27.5	28.24	32.48	0.222113	0.0533619
ENSG00000170581	STAT2	20.33	25.31	20.73	69.43	77.27	74.69	76.44	71.56	75.27	0.837591	0.953406
ENSG00000175536	LIPT2	1.48	2.35	0.67	7.36	1.92	2.11	1.81	2.88	1.78	0.172274	0.0534567
ENSG00000116863	ADPRHL2	43.02	47.27	30.87	46.51	52	47.2	53.95	55.51	56.11	0.0916641	0.0535058
ENSG00000163807	KIAA1143	9.89	7.6	7.45	6.49	6.12	8.31	5.68	6.13	5.75	0.195139	0.0535873
ENSG00000186765	FSCN2	0.63	0.62	0.65	0.38	0.6	0.82	0.86	0.78	0.7	0.404723	0.0537075
ENSG00000164951	PDP1	9.12	9.43	7.14	9.15	8.37	10.8	8.4	8.16	6.82	0.300758	0.0538212
ENSG00000167202	TBC1D2B	8.03	8.02	8.32	8.1	7.57	7.47	7.63	7.05	7.99	0.131789	0.0538288
ENSG00000144191	CNGA3	0.21	0.17	0.2	0.31	0.32	0.2	0.27	0.26	0.22	0.0996796	0.0538657
ENSG00000171045	TSNARE1	1.65	2.8	2.24	3.16	2.7	2.94	2.62	3.08	3.57	0.13469	0.0539669
ENSG00000165185	KIAA1958	1.8	1.74	2.06	1.28	1.57	2.12	1.57	1.65	1.68	0.169554	0.0541311
ENSG00000042493	CAPG	185.2	181.25	171.54	194.1	181.98	177.48	194.68	196.93	204.14	0.080918	0.0541319
ENSG00000126226	PCID2	41.71	40.98	41.42	43.13	35.71	38.45	30.91	33.52	39.09	0.183158	0.0541416
ENSG00000178917	ZNF852	1.67	1.44	2.1	1.03	1.14	1.18	0.97	1.1	0.8	0.0371931	0.054162
ENSG00000117475	BLZF1	10.73	11.55	8.97	12.97	17.48	18.39	14.71	18.35	10.62	0.0527844	0.0542583
ENSG00000197363	ZNF517	2.97	2.13	3.32	3	2.42	2.59	3.06	2.23	3.34	0.349431	0.0542998
ENSG00000135686	KLHL36	7.74	7.24	8.12	7.78	6.07	5.71	6.84	6.24	7.92	0.118589	0.0542998
ENSG00000068745	IP6K2	41.11	36.79	41.03	39.01	36.84	35.4	40.02	31.38	35.92	0.131056	0.0543899
ENSG00000150477	KIAA1328	2.4	1.99	2.31	2.18	2.27	2.81	2.76	2.15	2.95	0.236645	0.0544258
ENSG00000163870	TPRA1	75.61	74.03	52.81	85.16	88.97	84.4	81.73	80.79	70.1	0.0531156	0.054448
ENSG00000145736	GTF2H2	17.12	14.63	15.13	16.42	17.35	17.44	17.66	16.71	16.25	0.156278	0.0544739
ENSG00000254004	ZNF260	1.52	2.24	1.85	1.91	1.77	2.36	1.87	2.43	1.94	0.343994	0.0545673
ENSG00000112079	STK38	14.44	15.92	14.54	14.27	14.47	15.22	13.91	13.78	13.33	0.331512	0.0546263
ENSG00000198589	LRBA	6.64	8.62	6.15	7.57	9.48	8.61	9.01	9.1	7.96	0.0566012	0.0546341
ENSG00000175213	ZNF408	5.71	5.18	5.43	5.5	4.72	5.5	6.4	5.99	5.59	0.160708	0.0546508
ENSG00000196440	ARMCX4	1.34	1.91	0.74	3.99	1.62	2.52	2.54	2.21	1.41	0.127163	0.0546954
ENSG00000123342	MMP19	0.51	0.35	0.33	0.84	0.29	0.32	0.63	0.46	0.64	0.276327	0.0547972
ENSG00000115392	FANCL	18.67	19.53	20.88	18.6	17.18	18.68	17.35	16.99	15.94	0.085794	0.0550623
ENSG00000117859	OSBPL9	28.4	28.44	27.51	29.2	26.78	28.9	26.15	28	25.65	0.433715	0.0550926
ENSG00000170469	SPATA24	4.23	4.49	2.88	4.91	5.14	4.25	5.84	4.82	4.54	0.0309955	0.0551119
ENSG00000107554	DNMBP	2.82	3.15	3.49	3.22	3.09	2.88	2.73	2.9	3.09	0.393509	0.0551522
ENSG00000136631	VPS45	18.29	21.5	17.85	24.31	21.94	20.1	18.89	24.21	20.94	0.109679	0.0551976
ENSG00000187605	TET3	6.28	6.07	6.52	5.95	5.63	5.91	5.81	5.89	5.74	0.0149737	0.0552998
ENSG00000049618	ARID1B	9.67	11.83	9.55	10.27	8.29	9.56	8.47	9.19	8.76	0.264429	0.0553098
ENSG00000160190	SLC37A1	6.18	6.91	7.48	6.79	5.68	6.64	6.39	7.93	8.55	0.238144	0.0553245
ENSG00000158793	NIT1	30.71	30.73	25.77	33.02	27.89	29.36	32.71	33.07	31.64	0.327719	0.0553256
ENSG00000105695	MAG	0.48	0.47	0.51	0.47	0.51	0.19	0.63	0.62	0.54	0.240533	0.0553514
ENSG00000054654	SYNE2	9.25	8.13	8.72	8.19	11.54	11.59	10.35	9.3	11.8	0.171082	0.0553748
ENSG00000049323	LTBP1	0.6	0.24	0.7	0.49	0.3	0.24	0.32	0.18	0.39	0.191198	0.0553782
ENSG00000109572	CLCN3	12.18	11.92	11.93	12.58	11.6	12.5	11.31	11.42	10.14	0.255154	0.0554672
ENSG00000126777	KTN1	18.32	23.68	23.11	19.36	28.69	32.41	25.48	28.73	24.58	0.0825444	0.0554945
ENSG00000126778	SIX1	1.95	1.32	1.73	2.12	1.91	2.82	2.32	2.27	2.06	0.0731158	0.0555063
ENSG00000163320	CGGBP1	31.53	33.25	25.97	32.21	30.48	36.15	32	33.46	26.82	0.279098	0.0555404
ENSG00000079950	STX7	9.74	9.42	10.92	10.62	9.7	9.64	8.64	9.02	9.14	0.478052	0.0555409
ENSG00000129474	AJUBA	96.31	93.66	105.08	86.39	84.62	81.13	85.8	90.65	90.3	0.0488096	0.0556168
ENSG00000173269	MMRN2	5.87	6.36	5.45	8.23	6.07	5.95	8.7	7.63	6.3	0.194662	0.0557126
ENSG00000030110	BAK1	29.67	28.77	25.64	28.59	29.83	29.34	30.98	31.34	30.63	0.234253	0.0557515
ENSG00000105519	CAPS	1.03	0.46	0.83	0.86	0.38	0.66	1.26	1.03	1.02	0.0214899	0.0557813
ENSG00000154914	USP43	2.52	2.13	1.9	1.9	2.05	1.83	2.05	1.7	1.81	0.14664	0.0557813
ENSG00000143742	SRP9	160.7	190.63	168.15	194.69	175.65	191.9	154.65	185.78	153.38	0.220022	0.0557823
ENSG00000125166	GOT2	115.59	107.48	116.01	102.66	108.94	101.96	110.29	106.31	112.69	0.115299	0.055814
ENSG00000196954	CASP4	90.06	79.33	66.65	85.2	94.37	95.61	94.08	99.12	87.63	0.157536	0.0559811
ENSG00000170734	POLH	5.76	5.5	7.06	6.7	7.73	5.45	7.77	5.88	8.81	0.345068	0.0560536
ENSG00000125945	ZNF436	2.15	2.42	2.83	2.32	2.08	2.74	1.81	2.08	1.9	0.307865	0.0560744
ENSG00000137812	KNL1	2.9	4.89	3.53	3.35	6.38	5.26	4.66	5.32	5.77	0.0447435	0.056114
ENSG00000166750	SLFN5	36.68	31.32	22.71	34.87	42.87	43.08	39.19	41.81	35.85	0.129915	0.0561194
ENSG00000228696	ARL17B	6.59	6.79	9.25	5.15	7.13	7.14	7.83	7.36	9.61	0.140426	0.0561732
ENSG00000103966	EHD4	9.54	7.51	8.59	8.28	10.06	9.75	10.06	10.16	10.55	0.269756	0.0561958
ENSG00000165898	ISCA2	14.92	16.14	15.51	18.66	15.78	14.61	14.54	15.99	14.86	0.314702	0.0563032
ENSG00000116704	SLC35D1	6.11	5.61	5.82	6.28	5.83	6.52	6.42	6.2	5.97	0.0822375	0.0563099
ENSG00000196850	PPTC7	9.85	12.16	11.94	12.15	10.37	11.31	9.27	10.17	9.07	0.488382	0.0564181
ENSG00000138031	ADCY3	68.75	67.89	58.51	70.5	68.37	69.15	75.23	70.76	70.31	0.155793	0.0564398
ENSG00000156026	MCU	21.08	21.57	19.84	22	19.58	20.17	20.08	21.23	19.45	0.403648	0.0564452
ENSG00000099849	RASSF7	17.8	20.21	22.3	19.33	16.13	16.92	16.96	16.29	17.79	0.169348	0.056528
ENSG00000101193	GID8	17.98	16.71	17.28	16.2	14.93	16.01	15.63	16.11	16.06	0.0054831	0.0566107
ENSG00000173083	HPSE	7.2	8.53	6.3	9.04	7.75	8.93	9.05	9.6	10.17	0.177518	0.0566272
ENSG00000156172	C8orf37	1.38	1.12	1.16	0.93	1.03	1.26	0.95	1.04	0.77	0.229567	0.0566449
ENSG00000224051	CPTP	16.51	18.35	19.09	15.57	17.98	15.05	15.81	16.07	18.11	0.129138	0.0566641
ENSG00000011007	TCEB3	21.29	20.93	20.66	19.98	21.47	22.03	21.52	22.17	21.78	0.412121	0.0567226
ENSG00000137200	CMTR1	40.66	36.76	24.44	38.96	44.3	40.09	48.09	45.62	46.79	0.144585	0.0567316
ENSG00000187187	ZNF546	0.32	0.73	0.31	0.55	0.23	0.3	0.14	0.22	0.12	0.353159	0.0568423
ENSG00000093167	LRRFIP2	25.26	25.23	26.05	26.26	23.62	24.94	23.97	23.64	22.1	0.273939	0.056845
ENSG00000137338	PGBD1	3.26	3.58	3.23	4.19	2.75	2.55	3.16	3.08	2.69	0.382085	0.0568996
ENSG00000133612	AGAP3	30.93	29.71	32.56	30.05	28.17	27.08	25.96	27.78	30.88	0.104067	0.0569179
ENSG00000197620	CXorf40A	13.61	14.1	12.78	13.15	12.29	14.98	14.9	14.34	14	0.492998	0.0569193
ENSG00000078369	GNB1	193.63	174.71	183.28	197.13	185.59	186.17	172.93	169.17	173.13	0.0771065	0.0569585
ENSG00000085063	CD59	220.17	219.26	201.43	209.09	192.99	205.64	189.13	198.74	195.05	0.168056	0.0569616
ENSG00000189144	ZNF573	0.91	1.37	0.81	0.71	1.16	0.56	0.75	0.7	0.44	0.00239318	0.0569753
ENSG00000117519	CNN3	8.81	9.9	8.89	10.82	9.59	10.39	9.64	10.31	10.5	0.134457	0.0570024
ENSG00000111615	KRR1	15.97	23.69	14.88	17.55	22.7	23.18	20.77	25.32	16.73	0.198323	0.0570563
ENSG00000198056	PRIM1	32.75	38.64	30.61	34.26	35	34.41	29.49	35.04	29.95	0.411939	0.0570938
ENSG00000174842	GLMN	5.16	6.68	5.23	5.61	6.6	6.39	4.17	6.39	3.78	0.145754	0.0571379
ENSG00000119446	RBM18	10.86	10.54	9.32	9.51	8.51	9.45	10.57	9.28	7.75	0.11571	0.0571647
ENSG00000106682	EIF4H	211.33	206.4	210.52	211.57	204.54	208.26	204.75	195.41	208.1	0.118612	0.0573266
ENSG00000088247	KHSRP	271.33	267.98	260.42	289.49	279.47	265.77	284.37	270.35	271.49	0.0437638	0.0573392
ENSG00000148411	NACC2	9.46	8.45	9.18	9.14	8.77	8.7	8.75	8.31	8.69	0.289958	0.0573868
XLOC_022806	TCONS_00150007	0.51	0.8	0.98	0.85	0.63	1.08	0.43	0.6	0.63	0.301706	0.0574778
ENSG00000128284	APOL3	0.67	0.33	0.48	0.59	0.94	0.81	0.84	0.97	1.37	0.144397	0.0576156
ENSG00000188313	PLSCR1	242.09	169.42	118.01	214.11	261.48	260.32	264.96	286.14	244.65	0.153173	0.0576399
ENSG00000183840	GPR39	1.1	1.36	0.93	1.29	1.39	0.89	1.14	1.58	1.14	0.235523	0.0577046
ENSG00000188263	IL17REL	0.17	0.24	0.29	0.25	0.23	0.3	0.27	0.27	0.44	0.215732	0.0577232
ENSG00000023191	RNH1	187.89	178.06	167.16	186.4	172.26	171.96	191.1	194.02	185.08	0.406341	0.0577569
ENSG00000185453	C19orf68	4.33	4.73	5.15	4.98	4.82	5.14	4.47	4.9	5.58	0.178897	0.0578286
ENSG00000168539	CHRM1	0.57	0.55	0.27	0.5	1.3	0.64	0.64	0.91	0.66	0.138823	0.0578342
ENSG00000146535	GNA12	9.97	9.48	10.23	9.81	9.47	8.41	9.27	7.83	9.73	0.185578	0.0578605
XLOC_026213	TCONS_00169879	0.87	0.33	0.84	0.4	0.76	0.51	0.95	0.74	1.29	0.351121	0.0580567
ENSG00000148346	LCN2	110.91	107.54	120.23	89.06	105.23	94.45	89	102.86	93.81	0.074395	0.0582439
ENSG00000109180	OCIAD1	63.24	63.65	59.74	60.41	62.92	60.26	59.96	60.57	50.84	0.204375	0.058276
ENSG00000119508	NR4A3	3.86	4.74	4.69	3.61	3.73	3.72	3.6	3.35	3.23	0.0474541	0.058301
ENSG00000204175	GPRIN2	6.69	6.8	7.3	6.19	5.81	5.2	6.37	5.03	5.54	0.0636244	0.0583596
ENSG00000147676	MAL2	106.24	108.76	104.24	101.28	108.8	111.83	92.96	106.43	92.3	0.414993	0.0584057
ENSG00000177380	PPFIA3	6.46	6.69	7.44	6.39	6.71	5.72	5.8	4	6.05	0.203199	0.058464
ENSG00000143067	ZNF697	0.3	0.37	0.33	0.6	0.48	0.53	0.47	0.4	0.49	0.0328653	0.0584733
ENSG00000148110	MFSD14B	15.9	14.73	16.03	14.41	13.86	15.01	14.61	14.16	13.62	0.0131967	0.058561
ENSG00000254827	SLC22A18AS	2.29	1.45	1.5	3.02	1.63	2.38	2.45	2.36	2.24	0.0535646	0.0586101
ENSG00000117602	RCAN3	1.79	1.4	1.9	1.25	1.03	1.09	1.19	1.28	1.21	0.0232365	0.0586417
ENSG00000100997	ABHD12	62.98	60.42	74.01	63.5	62.83	59.24	59.76	54.31	61.52	0.271749	0.0586654
ENSG00000144136	SLC20A1	73.66	71.36	78.84	73.49	81.18	78.82	83.89	83.17	80.88	0.216953	0.0588506
ENSG00000173960	UBXN2A	10.95	12.35	10.83	11.13	11.59	12.07	10.75	11.29	10.1	0.36999	0.0589523
ENSG00000165886	UBTD1	9.93	9.16	10.76	10.79	9.93	10.13	8.53	8.77	10.13	0.280486	0.0589636
ENSG00000167380	ZNF226	16.88	13.99	16.62	19	14.93	15.66	17.73	17.65	18.59	0.258469	0.0590796
ENSG00000173451	THAP2	1.96	1.42	3.02	3.21	2.63	2.01	1.55	1.07	1.95	0.291922	0.0590809
ENSG00000065989	PDE4A	1.04	1.13	1.05	1.16	1.04	1.28	0.99	1.04	0.86	0.226664	0.0591764
ENSG00000005810	MYCBP2	9.4	10.68	9.27	12.73	16.85	18.93	17.65	13.04	12.86	0.0366193	0.0593041
ENSG00000054938	CHRDL2	2.98	3.54	2.04	2.33	2.62	3.06	1.61	2.7	1.76	0.39552	0.0593493
ENSG00000075539	FRYL	1.59	1.92	2.35	1.5	2.37	2.15	3.82	3	2.92	0.407735	0.0594617
ENSG00000165802	NSMF	15.43	16.4	16.55	16.18	14	14.11	15.04	14.09	14.53	0.163021	0.059519
ENSG00000164406	LEAP2	0.35	0.28	0.36	0.15	0.24	0.41	0.3	0.19	0.34	0.238818	0.0596145
ENSG00000086065	CHMP5	82.87	83.54	74.7	84.29	97.38	97.7	102.16	110.63	79.6	0.0891183	0.0596261
ENSG00000155906	RMND1	9.54	9.46	9.55	10.38	9.05	9.56	9.1	8.35	7.56	0.36412	0.0596606
ENSG00000140044	JDP2	29.76	29.43	30.39	30.8	28.83	24.74	27.36	26.43	29.88	0.23962	0.0597895
ENSG00000198870	STKLD1	0.84	0.89	0.54	0.79	0.45	0.45	0.45	0.72	0.43	0.129482	0.0598578
ENSG00000165661	QSOX2	21.32	21.23	20.53	19.07	19.35	19.82	19.92	18.19	19.72	0.0368623	0.0598827
ENSG00000125257	ABCC4	46.69	47.77	43.91	45.09	48.23	51.3	46.31	45.52	42.09	0.261826	0.0598837
ENSG00000092758	COL9A3	4.91	5.92	6.02	4.94	3.98	4.69	4.73	4.89	4.96	0.102389	0.059889
ENSG00000268350	FAM156A	22.14	20.56	19.57	20.51	18.53	23.2	19.66	19.19	19.02	0.498061	0.0599067
ENSG00000203812	HIST2H2AA3	82.27	98.51	75.28	109.1	91.9	117.16	93.54	115.71	115.05	0.142712	0.060008
ENSG00000135272	MDFIC	5.16	7.15	5.75	6.99	6.09	6.13	4.92	5.72	4.59	0.345499	0.0600474
ENSG00000138622	HCN4	1.15	1.09	1.09	1.23	1.35	1.07	1.25	1.36	1.56	0.161333	0.0600587
ENSG00000131037	EPS8L1	1.67	1.29	1.84	1.74	1.8	1.72	1.86	1.4	1.88	0.24878	0.0601814
ENSG00000221838	AP4M1	12.19	10.43	9.94	9.83	11.1	11.98	13.01	12.69	13.85	0.468333	0.0603836
ENSG00000036672	USP2	4.55	4.35	4.48	4.04	3.72	3.84	3.43	3.97	4.08	0.00245933	0.0606933
ENSG00000163293	NIPAL1	0.69	1.49	0.84	0.35	0.6	0.6	0.46	0.35	0.16	0.0680877	0.0607246
ENSG00000265354	TIMM23	104.07	110.05	94.62	97.77	99.18	97.53	85.03	98.3	90.9	0.1808	0.0607676
ENSG00000197771	MCMBP	57.2	55.25	52.56	54.35	52.39	54.49	50.64	52.21	50.86	0.256167	0.0608072
ENSG00000156232	WHAMM	2.25	2.3	1.87	2.8	2.96	3.22	2.42	3.35	2.84	0.0381739	0.0608355
ENSG00000134569	LRP4	0.53	0.88	0.98	0.45	0.45	0.57	0.48	0.65	0.68	0.0569955	0.0609084
ENSG00000133401	PDZD2	0.5	0.43	0.45	0.31	0.45	0.49	0.55	0.74	0.71	0.307739	0.0609787
ENSG00000104368	PLAT	0.52	0.39	0.81	0.41	0.23	0.24	0.26	0.28	0.32	0.0973064	0.0609959
ENSG00000196116	TDRD7	14.23	9.8	6.46	14.1	15.25	15.67	15.69	17.07	15.46	0.108087	0.0610921
ENSG00000010539	ZNF200	4.78	4.84	4.19	4.31	3.81	4.47	3.8	4.52	3.83	0.198027	0.0611597
ENSG00000128731	HERC2	14.69	16.57	16.21	19.97	15.07	18.68	16.35	19.47	16.81	0.20025	0.0612397
ENSG00000174010	KLHL15	4.35	4.96	5.31	4.73	4.84	5.02	3.74	4.31	3.49	0.482428	0.0612696
ENSG00000117226	GBP3	3.89	3.83	1.12	3.75	4.25	6.21	4.99	5.42	4.95	0.19659	0.0613022
ENSG00000029364	SLC39A9	26.53	23.37	26.97	25.22	24.19	26.92	24.02	22.92	24.13	0.399188	0.0613335
ENSG00000172594	SMPDL3A	3.08	3.17	2.95	2.02	3.11	3.18	1.85	2.9	2.29	0.263495	0.0614319
ENSG00000115170	ACVR1	4.71	4.59	5.45	5.17	5.03	4.83	3.76	4.4	4.89	0.409037	0.0614476
ENSG00000139173	TMEM117	1.93	2.17	1.42	1.36	2.12	1.85	1.51	1.14	1.12	0.42337	0.0615068
ENSG00000170647	TMEM133	0.26	0.46	0.44	0.42	0.22	0.22	0.16	0.17	0.34	0.261272	0.0615904
ENSG00000110203	FOLR3	0.76	0.48	1.06	0.25	0.59	1.95	1.88	1.99	1.31	0.362889	0.0616393
ENSG00000139921	TMX1	12.28	14.88	11.55	14.57	16.57	16.61	12.53	16.43	12.76	0.050491	0.0616416
ENSG00000160888	IER2	309.62	324.23	351.56	402.82	324.73	337.5	371.29	334.38	415.65	0.256089	0.0617286
ENSG00000110446	SLC15A3	6.45	3.58	2.89	7.19	8.32	5.87	7.96	12.53	9.3	0.0675715	0.0617292
ENSG00000108950	FAM20A	0.56	0.6	0.55	0.81	0.79	0.57	0.96	0.76	1.29	0.0779639	0.0617302
ENSG00000146648	EGFR	43.12	46.13	41.33	45.34	44.21	46.4	41.84	41.79	39.59	0.235387	0.0617333
ENSG00000186496	ZNF396	0.66	1.06	0.94	0.61	0.75	0.95	0.58	0.96	0.68	0.178398	0.0617495
ENSG00000170899	GSTA4	2.07	2.55	2.41	3.04	1.63	2.41	3.8	2.85	3.6	0.489204	0.0617648
ENSG00000133328	HRASLS2	7.84	8.87	5.1	8.21	10.85	9.44	10.87	10.6	11.78	0.0963685	0.0617966
ENSG00000167711	SERPINF2	0.63	0.27	0.1	0.56	0.15	0.35	0.75	0.67	0.74	0.43944	0.0618115
ENSG00000184979	USP18	111.27	76.11	26.58	101.46	117.59	115.16	129.31	139.21	125	0.146871	0.0618175
ENSG00000144749	LRIG1	2.7	3.76	2.83	2.72	3.47	3.08	3.86	4.27	3.14	0.484942	0.0618525
ENSG00000184307	ZDHHC23	2.57	2.61	2.99	2.82	2.3	2.5	2.13	2.23	1.8	0.248552	0.0618949
ENSG00000123240	OPTN	28.69	25.62	26.93	30.25	34.21	34.02	33.45	35.59	29.37	0.0574943	0.0619193
ENSG00000008256	CYTH3	19.24	17.97	18.81	17.11	16.41	17.29	15.94	16.03	18.16	0.00631259	0.0620947
ENSG00000243137	PSG4	0.86	1.24	0.63	1.23	0.87	0.81	0.69	0.65	0.39	0.406097	0.0621105
ENSG00000174238	PITPNA	42.12	41.3	45.23	42.51	41.78	39.53	34.04	34.98	43.95	0.256813	0.0621421
ENSG00000163794	UCN	1.48	1.9	2.34	1.45	1.07	1.06	1.29	1.49	1.52	0.0951324	0.0621786
ENSG00000116675	DNAJC6	6.12	5.88	7.21	4.58	4.5	4.81	5.45	4.67	4.57	0.0152245	0.062198
ENSG00000100307	CBX7	2.62	2.08	2.89	2.6	2.32	2.34	2.47	1.9	2.41	0.341339	0.0622325
ENSG00000158042	MRPL17	82.4	80.81	81.09	88.48	80.78	77.98	85.03	84.08	81.6	0.375726	0.06227
ENSG00000075945	KIFAP3	11.13	12.22	10.28	12.18	11.42	11.85	11.64	12.41	10.44	0.243862	0.0623622
ENSG00000108671	PSMD11	69.1	68.52	69.92	84.55	73.27	76.6	78.37	69.94	78.65	0.0563323	0.0624557
ENSG00000100227	POLDIP3	47.21	48.31	42.49	42.11	44.66	45.42	39.18	41.35	41.27	0.257291	0.0625195
ENSG00000106089	STX1A	5.08	3.12	6.02	2.87	2.69	3.08	3.12	2.75	3.61	0.0650056	0.062607
ENSG00000103254	FAM173A	13.32	16.85	9.89	25.86	21.31	20.01	20.24	18.05	14.49	0.0317655	0.0626352
ENSG00000179335	CLK3	44	37.93	51	47.09	36.55	35.99	36.76	36.82	43.95	0.250475	0.0627093
ENSG00000173653	RCE1	22.59	23.51	19.64	23	23.01	20.93	27.17	24.64	26.33	0.259935	0.0627164
ENSG00000197879	MYO1C	74.7	76.62	77.56	66.68	65.87	72.08	72.67	68.57	65.65	0.0168287	0.0627512
ENSG00000086666	ZFAND6	65.39	61.49	63.74	67.39	61.22	65.21	58.46	59.15	61.36	0.130016	0.0627768
ENSG00000147251	DOCK11	0.56	1.1	0.75	0.76	1.12	1.39	1.22	1.31	0.99	0.129915	0.0628566
ENSG00000103152	MPG	44.46	48.29	48.38	43.09	45.79	39.68	43.73	43.61	44.8	0.10365	0.0629018
ENSG00000170871	KIAA0232	2.97	2.47	2.77	2.15	2.54	2.64	2.26	2.34	1.91	0.195105	0.0629112
ENSG00000113966	ARL6	3.17	3.91	3.18	2.6	3.09	2.91	2.87	2.34	2.25	0.0367825	0.0629138
ENSG00000183032	SLC25A21	1.56	1.22	1.37	1.22	1.74	1.36	1.82	1.48	1.41	0.421022	0.0629266
ENSG00000184154	LRTOMT	7.78	7.06	6.36	12.56	11.55	11.35	9.49	7.74	9.57	0.00046432	0.0630959
ENSG00000128886	ELL3	2.73	2.99	1.15	2.31	2.71	2.14	3.2	3.57	2.69	0.424666	0.0631253
ENSG00000187630	DHRS4L2	10.96	14.3	12.71	13.62	9.96	12.66	14.54	15.35	14.11	0.401895	0.063166
ENSG00000125122	LRRC29	0.42	0.44	0.55	1.09	0.55	0.86	0.62	0.48	0.81	0.0784304	0.0632147
XLOC_020483	TCONS_00133362	0.69	0.65	0.61	0.76	0.84	0.92	0.97	0.75	0.7	0.0556087	0.0632393
ENSG00000136273	HUS1	11.01	12.37	11.31	9.52	9.13	10.6	8.76	7.73	10.23	0.0681201	0.0633136
ENSG00000115484	CCT4	163.98	161.47	166.48	158.8	161.41	164.35	157.15	160.3	158.55	0.120161	0.0633293
ENSG00000174579	MSL2	11.61	8.66	11.42	9.74	8.16	8.6	8.63	8.22	8.88	0.0619771	0.063352
ENSG00000227471	AKR1B15	0.25	0.7	0.35	0.68	0.69	0.74	0.66	0.86	0.47	0.097269	0.0633611
ENSG00000130640	TUBGCP2	39.35	36.76	32.54	33.18	40.2	39.25	46.43	39.56	45.84	0.382077	0.0633619
ENSG00000110911	SLC11A2	31.59	26.95	34.96	29.09	26.94	28.94	27.6	25.77	28.47	0.122243	0.0633881
ENSG00000083828	ZNF586	3.25	3.8	2.83	3.02	2.94	3.63	2.39	2.47	2.6	0.430054	0.0634982
ENSG00000198393	ZNF26	4.24	4.54	4.41	3.33	3.51	3.65	2.67	4.05	1.78	0.00372342	0.0635326
ENSG00000166762	CATSPER2	0.99	0.64	0.45	0.14	0.76	0.58	0.35	0.17	0.35	0.300505	0.0635493
ENSG00000095596	CYP26A1	0.96	0.76	1.37	0.9	0.99	0.87	0.58	0.67	1.19	0.327929	0.0636306
ENSG00000127423	AUNIP	13.92	13.88	13.2	13.41	14.14	11.5	14.99	15.35	13.43	0.186187	0.0636816
ENSG00000185404	SP140L	5.47	3.95	3.69	5.66	6.52	6.84	13.38	7.81	5.5	0.0808005	0.0637308
ENSG00000187239	FNBP1	10.62	10.87	10.71	9.45	11.34	11.74	9.39	10.07	10.5	0.441488	0.063743
ENSG00000125962	ARMCX5	10.95	9.99	7.63	8.59	9.34	10.3	11.22	11.54	9.48	0.472904	0.0637587
ENSG00000143641	GALNT2	62.01	63.32	64.39	59.76	60.65	58.8	59.41	57.66	63.01	0.0396696	0.0637964
ENSG00000181104	F2R	0.27	0.39	0.41	0.3	0.88	0.25	0.21	0.38	0.37	0.298729	0.0638216
ENSG00000164778	EN2	0.35	0.38	0.34	0.52	0.55	0.54	0.51	0.62	0.38	0.0015361	0.0638216
ENSG00000118965	WDR35	2.02	1.66	1.75	1.72	2.15	2.4	2.88	2.9	1.95	0.220484	0.0638303
ENSG00000135414	GDF11	1.84	1.93	1.92	1.63	1.5	1.36	1.63	1.52	1.04	0.0297263	0.0640566
ENSG00000136238	RAC1	129.29	127.68	137.11	133.04	128.38	122.98	124.39	126.94	133.42	0.309074	0.0640779
ENSG00000124201	ZNFX1	28.85	23.79	16.18	30.23	31.29	32.61	32.8	32.7	34.03	0.0966344	0.0640948
ENSG00000135953	MFSD9	4.03	3.66	2.97	4.71	2.75	5.22	2.6	3.01	2.62	0.268649	0.0641128
ENSG00000148834	GSTO1	76.9	79.52	73.58	84.41	77.16	78.75	85.39	81.66	86.45	0.183677	0.0641836
ENSG00000163026	WDCP	2	3.09	2.74	2.11	2.49	2.39	1.87	2.31	1.83	0.155204	0.064199
ENSG00000141458	NPC1	27.21	32.58	33.04	23.46	26.67	26.77	26.03	25.09	24.74	0.0106313	0.0642396
ENSG00000162572	SCNN1D	1.26	1.36	1.52	1.36	1.31	1.06	1.5	2.03	1.73	0.249981	0.0642782
ENSG00000075420	FNDC3B	19.7	17.97	19.22	16.6	19.24	19.45	17.77	17.62	16.81	0.362452	0.0642927
ENSG00000109171	SLAIN2	12.16	13.07	11.16	10.02	12.25	18.66	6.94	11.88	3.65	0.332883	0.0643134
ENSG00000115464	USP34	7.78	8.47	7.73	5.35	8.13	8.89	8.06	9.01	8.9	0.328756	0.0643626
ENSG00000108771	DHX58	2.86	1.79	1.02	2.71	3.9	3.18	3.72	3.41	4.57	0.106605	0.0643659
ENSG00000139505	MTMR6	3.35	4.38	4.48	2.94	3.31	4.15	2.95	3.53	2.72	0.0618191	0.0644592
ENSG00000130787	HIP1R	16.99	14.66	17.3	15.66	17.99	16.1	17.31	15.78	19.12	0.438925	0.0644824
ENSG00000186376	ZNF75D	2.28	1.73	1.86	1.37	2.01	2.38	1.37	1.45	1.53	0.470729	0.0645539
ENSG00000100330	MTMR3	9.67	10.68	9.2	9.65	8.49	8.84	8.8	9.76	9.07	0.165735	0.064562
ENSG00000197818	SLC9A8	5.95	5.44	5.05	6.51	6.14	5.78	6.8	5.75	6.61	0.00308973	0.0645988
ENSG00000023839	ABCC2	11.94	11.66	9.44	12.6	11.54	12.61	13.14	13.27	13.61	0.16947	0.0646436
ENSG00000214309	MBLAC1	1.36	1.82	1.17	1.76	1.3	0.99	1.88	2.19	1.25	0.372698	0.0646502
ENSG00000175470	PPP2R2D	16.46	15.04	17.52	16.81	14.42	13.87	13.96	14.49	13.97	0.195706	0.0646764
ENSG00000123143	PKN1	95.01	87.67	106.05	87.69	90.23	83.57	88.42	84.81	92.88	0.169322	0.0647326
ENSG00000196670	ZFP62	8.71	7.56	10.32	9.01	8.62	9.84	7.44	5.55	5.51	0.288598	0.0647449
ENSG00000132792	CTNNBL1	24.74	24.69	25.35	23.08	28.3	27	25.82	27.87	31.01	0.25845	0.0648842
ENSG00000172340	SUCLG2	28.9	33.47	27.47	29.68	30.12	33.9	28.2	31.11	26.59	0.347194	0.064921
ENSG00000187608	ISG15	1935.8	1159.63	1798.83	1601.12	2206.34	1923.77	2448.84	2530.4	2203.61	0.281543	0.0649478
ENSG00000144357	UBR3	4.06	3.55	3.39	2.96	3.33	4.36	3.24	3.39	2.94	0.431871	0.0649857
ENSG00000149131	SERPING1	0.43	0.86	0.78	0.83	0.76	1.19	1.43	1	1.59	0.147511	0.0651436
ENSG00000118507	AKAP7	1.42	1.43	0.8	1.24	1.23	1.69	1.96	1.53	1.5	0.341658	0.0652283
ENSG00000121644	DESI2	18.19	19.96	20.4	19.73	18.04	19.76	16.65	18.04	15.21	0.384219	0.0652823
ENSG00000168404	MLKL	16.35	13.82	8.29	17.12	19.55	20.2	18.53	19.95	19.52	0.0985749	0.0653812
ENSG00000139263	LRIG3	6.03	5.91	6.66	5.17	5.19	5.11	5.03	5.62	5	0.0277374	0.065407
ENSG00000211456	SACM1L	8.55	8.53	8.97	8.16	11.76	9.54	8.39	8.02	8.09	0.201975	0.0654221
ENSG00000147316	MCPH1	4.84	6.21	5.16	4.45	6.86	5.38	4.56	4.14	3.35	0.324448	0.0655167
ENSG00000090470	PDCD7	19.23	20.85	20.39	20.12	19.87	18.67	21.78	21.3	21.9	0.259267	0.0656654
ENSG00000075975	MKRN2	21.3	21.61	18.65	25.05	17.66	23.28	24.34	22.09	22.21	0.321106	0.0656909
ENSG00000134152	KATNBL1	6.02	6.88	7.47	6.2	8.6	6.78	8.62	10.2	7.93	0.312404	0.0658236
ENSG00000152240	HAUS1	18.23	21.84	14.77	23.09	21.61	22.9	18.39	23.04	15.84	0.111227	0.065836
ENSG00000168078	PBK	26.95	30.9	25.22	30.22	30.16	30.99	29.26	32.03	25.72	0.140959	0.0658412
ENSG00000112159	MDN1	2.64	2.92	2.43	2.52	2.9	2.74	2.8	3.33	3.22	0.352636	0.0658651
ENSG00000145861	C1QTNF2	0.8	0.55	0.62	1.09	1.03	0.57	1.02	1.05	1.64	0.130842	0.065889
ENSG00000177283	FZD8	0.33	0.32	0.27	0.4	0.3	0.27	0.47	0.34	0.42	0.301737	0.0659132
XLOC_019817	TCONS_00130143	0.77	0.79	1.05	1.09	0.86	1.13	0.84	1.09	1.5	0.0976287	0.065937
ENSG00000075711	DLG1	16.51	19.8	15.51	18.03	15.56	19.59	19.32	21.76	15.93	0.4354	0.0659436
ENSG00000127540	UQCR11	91.17	94.71	90.14	84.97	88.95	82.41	84.4	83.44	88.2	0.00408623	0.0659918
ENSG00000239789	MRPS17	18.41	18.96	20.3	18.52	18.91	17.14	18	17.66	18.03	0.217013	0.0660872
ENSG00000102096	PIM2	6.2	7.71	9.74	7.67	5.77	7.6	6.02	6.77	8.47	0.267528	0.0661482
ENSG00000196981	WDR5B	2.29	2.57	2.04	2.47	2.18	2.48	1.91	2.23	1.99	0.392022	0.0661541
ENSG00000125089	SH3TC1	5.15	4.6	6.48	5.26	4.18	5.67	5.29	5.07	6.65	0.148195	0.0661844
ENSG00000118369	USP35	3.15	3.17	4.5	4.58	3.62	4.26	3.28	3.88	4.9	0.18817	0.066232
ENSG00000108551	RASD1	1.17	1.15	0.77	1.2	0.82	0.81	0.46	0.68	0.66	0.275126	0.0662536
ENSG00000143543	JTB	218.36	222.02	211.21	219.58	213.37	206.14	213.97	213.33	209.42	0.142739	0.066365
ENSG00000258659	TRIM34	5.37	4.26	2.47	6.3	6.26	5.95	5.92	7.9	6.69	0.0508838	0.0664753
ENSG00000053900	ANAPC4	4.64	4.58	5.05	4.22	5.66	5.54	4.31	4.42	4.34	0.236136	0.0665129
ENSG00000057657	PRDM1	11.27	11.25	9.6	7.38	10.6	12.76	10.55	10.49	7.34	0.421173	0.06653
ENSG00000203667	COX20	31.42	30.76	22.63	29.16	25.22	27.04	25.59	24.84	21.85	0.36834	0.0665694
ENSG00000239382	ALKBH6	8.9	9.98	7.56	12.03	11.32	9.52	11.9	10.37	10.42	0.0275241	0.0666201
ENSG00000158195	WASF2	53.21	51.81	52.4	54.53	49.22	50.9	49.75	50	51.72	0.255552	0.0666519
ENSG00000100271	TTLL1	5.37	4.2	4.3	6.21	4.98	6.15	5.96	4.78	6.09	0.0397327	0.0666843
ENSG00000141012	GALNS	28.09	27.23	30.74	26.09	29.43	28.17	27.75	25.67	28.45	0.325913	0.0667259
ENSG00000152137	HSPB8	19.02	17.35	18.59	15.98	16.24	15.35	15.76	16.11	17.68	0.0341553	0.0667417
ENSG00000163349	HIPK1	12.2	11.56	12.49	12.16	11.52	12.26	11.25	10.99	12.33	0.122176	0.0667455
ENSG00000227057	WDR46	34.33	31.72	31.96	31.64	33.29	30.94	36.25	32.37	35.46	0.311508	0.0667675
ENSG00000149346	SLX4IP	0.82	0.9	0.79	0.77	0.76	1.02	0.53	0.85	0.62	0.457836	0.0667999
ENSG00000122694	GLIPR2	1.67	1.33	1.36	1.84	1.48	1.77	1.72	1.7	1.75	0.0502046	0.066913
ENSG00000171992	SYNPO	11.91	13.1	15.96	11.73	11.36	11.01	11.25	11.25	12.49	0.122248	0.0670621
ENSG00000162746	FCRLB	0.21	0.22	0.22	0.24	0.16	0.32	0.24	0.34	0.41	0.332188	0.0670809
XLOC_027139	TCONS_00175057	62.21	58.4	72.31	47.86	52.32	50.45	56.09	52.77	54.27	0.0452683	0.0670824
ENSG00000165637	VDAC2	199.27	200.82	205.68	190.04	184.54	196.57	195.75	189.13	185.41	0.0198461	0.0671572
ENSG00000119138	KLF9	0.29	0.46	0.68	0.22	0.17	0.33	0.24	0.23	0.34	0.0543309	0.0671843
ENSG00000033030	ZCCHC8	14.86	15.11	16.27	14.83	15.77	15.7	13.61	14.14	12.87	0.48015	0.067386
ENSG00000196323	ZBTB44	7.69	8.27	7.54	9.29	8.76	8.17	7.83	9.35	8.65	0.060856	0.0674581
ENSG00000176715	ACSF3	20	17.99	16.85	16.37	18.06	20.75	21.74	22.1	25.25	0.48158	0.0675373
ENSG00000116473	RAP1A	30.46	37.86	33.13	32.1	34.87	36.8	30.12	35.44	30.39	0.366318	0.0675523
ENSG00000116580	GON4L	8.63	7.94	7.57	7.39	8.34	8.64	6.78	6.91	7.24	0.460619	0.0675865
ENSG00000204257	HLA-DMA	4.54	4.09	2.32	4.47	4.56	3.23	4.76	5.87	3.92	0.131633	0.0676174
ENSG00000205220	PSMB10	29.91	31.3	20.16	34.15	35.98	33.17	38.9	35.34	39.07	0.0622468	0.067618
ENSG00000197535	MYO5A	2.89	2.83	2.7	3.17	3.89	4.98	3.58	3.29	4.45	0.0869388	0.0677051
ENSG00000160781	PAQR6	2.15	1.68	2.1	1.94	1.58	1.83	1.52	1.56	1.77	0.0301757	0.0677371
ENSG00000214736	TOMM6	248.8	249.63	227.38	230.84	224.56	212.66	224.51	240.3	220.82	0.0121488	0.067758
ENSG00000205643	CDPF1	8.02	7.22	8.02	8.49	7.95	7	8.3	9.5	10.11	0.461208	0.0677714
ENSG00000146233	CYP39A1	1.61	2.64	1.94	5.16	2.35	2.01	3.08	2.9	2.76	0.230166	0.0678016
ENSG00000149658	YTHDF1	31.76	31.35	33.2	32.09	31.04	30.82	32.09	32.56	33.66	0.218794	0.0678158
ENSG00000154124	OTULIN	21.29	22.32	19.1	26.18	22.56	23.99	21.59	24.77	21.38	0.081985	0.0678713
ENSG00000169972	PUSL1	24.89	22.72	27.07	23.53	22.02	21.3	19.68	22.03	23.22	0.121341	0.0679714
ENSG00000108679	LGALS3BP	286.54	230.57	322.64	263.64	333.64	298.27	349.44	313.45	333.36	0.351346	0.0680767
XLOC_010297	TCONS_00065002	0.33	0.32	0.4	0.27	0.51	0.34	0.26	0.2	0.38	0.40289	0.0680877
ENSG00000106689	LHX2	2.01	2.01	3.3	2.33	1.8	1.33	1.86	1.44	2.36	0.232447	0.0680948
ENSG00000171310	CHST11	0.67	3.07	2.56	2.74	1.36	1.23	2.32	3.5	3.21	0.406547	0.0681266
ENSG00000167977	KCTD5	27.66	25.25	27.02	36.83	37.96	37.27	38.89	34.26	28.42	0.00471519	0.0681521
ENSG00000135108	FBXO21	36.05	38.49	34.21	37.67	33.72	34.04	33.61	28.09	29.71	0.309858	0.0681652
ENSG00000174306	ZHX3	6.23	5	4.17	4.76	5.42	6.47	5.25	2.97	3.75	0.369343	0.0681772
ENSG00000131236	CAP1	91.73	88.32	89.44	86.02	85.26	89.12	88.25	87.67	84.59	0.0954367	0.0682816
ENSG00000155363	MOV10	51.31	35.98	33.73	49.38	51.33	47.51	53.75	54.16	54.09	0.121008	0.0683193
ENSG00000274897	PANO1	0.49	0.43	0.47	0.6	0.31	0.44	0.19	0.3	0.4	0.430242	0.0683234
ENSG00000165304	MELK	37.55	34.26	28.13	37.64	34.18	38.11	38.11	38.91	32.12	0.211057	0.068353
ENSG00000161542	PRPSAP1	39.8	38.52	36.54	37.18	37.9	36.1	35.53	31.86	35.55	0.110596	0.068417
ENSG00000139083	ETV6	4.67	3.91	3.72	4.45	4.95	6.12	5.41	6.97	5	0.145876	0.0684912
ENSG00000215784	FAM72D	3.18	3.77	3.7	2.9	2.41	2.7	2.91	2.34	2.96	0.054623	0.0685624
ENSG00000125618	PAX8	0.38	0.48	0.55	0.63	0.73	0.7	0.44	0.97	1.05	0.0114301	0.0686129
ENSG00000136213	CHST12	11.38	11.01	10.24	9.94	11.16	9.73	11.65	11.2	10.95	0.161487	0.0686502
ENSG00000239857	GET4	31.32	28.86	31.64	29.78	29.7	28.38	29.19	27.81	26.9	0.191206	0.0687518
ENSG00000121964	GTDC1	3.48	4.13	3	3.2	3.8	4.58	4.24	4.22	3.74	0.329072	0.0688444
ENSG00000105556	MIER2	13.4	10.88	14.47	11.56	11.9	13.43	14.64	12.74	14.73	0.271208	0.0690097
ENSG00000179981	TSHZ1	2.94	2.65	3.22	2.62	2.55	2.73	2.64	2.37	2.31	0.0575429	0.0691193
ENSG00000238083	LRRC37A2	1.07	1.17	1.71	1.39	1.09	1.19	0.87	1.07	1.26	0.36874	0.0691363
ENSG00000277462	ZNF670	1.51	1.46	1.54	1.9	1.67	1.59	1.43	1.1	1.38	0.0790565	0.0691363
ENSG00000153914	SREK1	10.98	11.02	9.6	12.08	11.79	13.13	12.21	12.11	13.24	0.0872515	0.0692085
ENSG00000133710	SPINK5	0.81	1.63	0.39	0.68	1.12	1.48	1.76	1.74	1.3	0.392678	0.0692113
ENSG00000166888	STAT6	65.22	61.17	53.65	70.55	63.78	67.57	68.82	68.86	70.45	0.082983	0.0692221
ENSG00000168612	ZSWIM1	3.75	3.51	4.12	3.48	3.94	3.22	3.51	2.74	3.87	0.293274	0.0692402
ENSG00000178685	PARP10	81.66	59.11	29.43	78.73	94.99	85	96.81	93.09	102.04	0.114063	0.0692515
ENSG00000140521	POLG	19.99	20.39	19.86	21.77	19.89	20.38	21.16	21.04	22.63	0.229455	0.0692971
ENSG00000171132	PRKCE	0.82	0.87	0.94	1.06	1.39	1.25	1.13	1.32	1	0.0256936	0.069398
ENSG00000173531	MST1	6.37	6.29	6.03	7.94	5.6	7.5	6.89	8.28	9.37	0.199661	0.0694724
ENSG00000117569	PTBP2	3.51	3.43	3.38	2.63	2.26	2.82	1.98	3.12	2.65	0.0193199	0.0695016
ENSG00000184083	FAM120C	8.84	8.48	7.6	10.65	9.53	8.75	9.87	8.72	9.24	0.0151868	0.0695247
ENSG00000184209	SNRNP35	14.58	14.38	14.53	16.06	16.87	14.15	16.36	14.74	15.38	0.145265	0.0695323
ENSG00000170190	SLC16A5	13.58	14.28	14.3	14.46	14.25	13.41	15.01	14.45	15.42	0.490777	0.0695987
ENSG00000138182	KIF20B	1.95	2.26	2.78	1.9	3.32	4.03	3.33	3.77	2.95	0.102118	0.0696573
ENSG00000086015	MAST2	9.32	10.9	10.96	11.18	9.63	9.88	8.93	9.35	10.35	0.443369	0.0697108
ENSG00000135926	TMBIM1	28.34	27.41	32.21	23.66	27.73	24.63	27.81	23.06	27.48	0.113334	0.0697609
ENSG00000067334	DNTTIP2	10.29	10.83	9.43	9.48	12.86	14.05	11.37	13.54	10.1	0.170144	0.069865
ENSG00000241837	ATP5O	171.72	174.51	155.49	189.33	174.54	173.38	177.59	177.36	168.63	0.0914197	0.0698707
ENSG00000171314	PGAM1	275.06	274.1	310.14	296.38	307.51	317.04	321.15	320.95	315.43	0.0577567	0.0699203
ENSG00000168152	THAP9	0.54	0.51	0.24	0.56	0.86	0.49	0.63	1.28	0.84	0.0843324	0.0700672
ENSG00000138378	STAT4	0.12	0.18	0.13	0.41	0.73	0.29	0.23	0.46	0.2	0.0503699	0.0700747
ENSG00000110697	PITPNM1	22.35	30.53	36.88	35.37	29.17	32.95	20.44	20.24	22.06	0.336739	0.0700795
ENSG00000174370	C11orf45	2.97	1.49	1.9	1.92	2.29	2.39	3.7	1.67	2.19	0.450796	0.0701326
ENSG00000152217	SETBP1	2.4	2.36	1.84	2.67	2.59	2.67	2.55	2.5	2.3	0.0746346	0.0701565
ENSG00000178764	ZHX2	10.22	9.51	9.82	9.11	8.74	9.31	9.25	8.94	9.67	0.0222025	0.0701791
ENSG00000141699	FAM134C	12.51	19.52	15.75	13.13	12.25	14.78	12.06	15.68	12.79	0.201151	0.0701822
ENSG00000150779	TIMM8B	81.06	77.39	73.97	77.97	75.8	68.2	77.86	72.71	73.36	0.0521366	0.070188
ENSG00000138617	PARP16	10.19	11.34	9.52	12.6	10.98	9.88	10.54	13.08	12.14	0.217558	0.0703492
ENSG00000102189	EEA1	0.98	1.51	1.39	0.6	1.84	1.97	1.87	1.67	1.85	0.300763	0.0703495
ENSG00000196072	BLOC1S2	17.77	19.5	17.11	19.75	19.6	20.89	16.89	19.33	15.81	0.103679	0.0703746
ENSG00000078668	VDAC3	62.1	67.26	56.97	67.25	59.42	66.31	62.24	68.53	58.04	0.354978	0.0704222
ENSG00000059378	PARP12	58.87	44.76	25.13	60.36	63.38	66.39	66.66	71.59	73.07	0.108844	0.0704735
ENSG00000169871	TRIM56	7.51	6.22	5.58	7.88	9.7	7.87	7.84	9.25	8.52	0.0761956	0.0705441
ENSG00000168036	CTNNB1	53.4	52.53	50.91	48.72	51.49	47.95	50.46	51.24	50.27	0.0552793	0.0705668
ENSG00000166471	TMEM41B	14.13	13.5	12.71	12.06	12.1	11.91	11.7	13.07	9.26	0.0302266	0.070567
ENSG00000143390	RFX5	57.5	53.28	50.42	54	49.65	58.15	59.37	59.57	52.5	0.481233	0.0705843
ENSG00000117525	F3	14.88	13.81	14.66	15.31	13.11	15.46	15.08	15.13	15.44	0.366574	0.0705965
ENSG00000147206	NXF3	12.98	13.44	6.32	18.64	14.76	16.38	15.92	17.39	17.22	0.0766089	0.0706296
ENSG00000198925	ATG9A	23.92	24.99	26.38	24.1	27.05	22.08	23.57	22.53	24.85	0.375367	0.0706546
ENSG00000135698	MPHOSPH6	13.72	12.78	11.86	12.73	12.53	12.68	12.96	11.24	11.57	0.407418	0.0707093
ENSG00000198691	ABCA4	0.75	0.87	0.27	1	0.93	0.68	1.31	0.98	1.11	0.0705146	0.0707663
ENSG00000110851	PRDM4	9.35	7.45	9.67	8.11	8.47	8.83	6.95	7.17	7.87	0.331135	0.0707772
ENSG00000113732	ATP6V0E1	93.23	92.98	84.03	86.66	94.6	92.71	85.5	84.1	83.08	0.402166	0.0708279
ENSG00000117411	B4GALT2	35.65	38.16	37.92	32.93	30.84	30.76	34.91	36.28	37.46	0.0313468	0.0709091
XLOC_011963	TCONS_00076846	0.49	1.1	0.14	0.8	0.24	1.08	1.61	1.45	0.49	0.414139	0.0709361
ENSG00000185614	FAM212A	0.64	0.43	0.34	0.52	0.66	0.86	0.15	0.16	0.26	0.187043	0.0709369
ENSG00000125863	MKKS	14.51	15.86	16.16	12.39	15.81	15.31	14.28	13.69	14.11	0.118402	0.0709467
ENSG00000188343	FAM92A1	4.92	5.39	6.11	5.01	5.33	4.4	4.56	4.48	4.23	0.216955	0.0709625
ENSG00000196705	ZNF431	3.44	3.44	2.51	2.84	3.36	3.46	5.34	3.85	3.34	0.430807	0.0711247
ENSG00000099250	NRP1	8.99	9.79	6.18	10.1	11.05	9.31	12.54	10.87	12.72	0.0530068	0.0711724
ENSG00000141655	TNFRSF11A	3.3	2.41	2.87	3.07	2.86	3.24	3.52	3.32	3.23	0.228073	0.07118
ENSG00000021355	SERPINB1	60.47	61.73	56.32	59.77	62.38	67.75	70.36	62.78	64.65	0.213586	0.0712101
ENSG00000142182	DNMT3L	2.32	3.06	2.98	2.61	3.39	2.15	1.84	2.62	2.93	0.435447	0.0712328
XLOC_017887	TCONS_00118840	1.79	1.38	0.52	0.64	1.8	2.1	1.19	1.23	0.29	0.377241	0.0712627
ENSG00000138756	BMP2K	2.75	2.38	2.78	2.86	2.92	3.64	4.04	5.43	3.46	0.073242	0.0713439
ENSG00000169976	SF3B5	114.01	110.4	116.46	106.67	110.03	102.34	110.34	109.68	110.9	0.104113	0.0713479
ENSG00000113494	PRLR	0.39	0.6	0.19	0.23	0.41	0.81	0.49	1.2	1.03	0.383304	0.0713482
ENSG00000196843	ARID5A	1.72	2.25	2.33	2.3	2.79	3.13	2.6	2.69	2.49	0.00778938	0.071387
ENSG00000140262	TCF12	21.65	22.32	21.3	22.29	24.87	26.6	17.65	21.39	19.67	0.0857428	0.0713989
ENSG00000149150	SLC43A1	18.52	16.88	25.47	14.9	15.22	16.11	14.01	14.98	15.82	0.0845258	0.0715232
ENSG00000047617	ANO2	2.19	1.17	1.99	1.85	1.55	0.65	1.07	0.98	1.4	0.238252	0.071524
ENSG00000040341	STAU2	15.93	16.5	15.54	15.19	14.54	13.85	13.41	15.93	11.45	0.02919	0.0715557
ENSG00000121236	TRIM6	0.3	0.35	0.22	0.45	0.26	0.38	0.35	0.51	0.52	0.232105	0.0715949
ENSG00000144485	HES6	6.64	6.96	5.62	7.44	5.87	6.44	6.85	7.68	6.93	0.403245	0.0716258
ENSG00000165806	CASP7	24.03	19.62	17.82	20.57	24.61	25.64	24.68	25.88	24.12	0.227382	0.0717717
ENSG00000033327	GAB2	9.14	9.76	8.83	9.34	8.76	8.7	7.24	7.68	8.62	0.238859	0.0718378
ENSG00000091542	ALKBH5	45.17	46.44	49.17	50.72	45.49	49.11	49.26	49.01	49.72	0.267257	0.0718832
ENSG00000205309	NT5M	4.76	5.24	4.1	3.52	3.75	3.89	4.05	5	3.9	0.0647267	0.0720262
ENSG00000177432	NAP1L5	0.66	0.89	0.98	0.79	0.68	0.79	0.48	0.87	0.78	0.249871	0.0720395
ENSG00000196456	ZNF775	1.56	1.81	1.67	1.34	2.13	2.27	1.74	2.22	2.57	0.217263	0.0721146
ENSG00000221843	C2orf16	0.37	0.5	0.21	0.47	0.4	0.37	0.57	0.53	0.48	0.283705	0.0721335
ENSG00000110321	EIF4G2	187.4	177.7	165.08	169.16	178.71	192.03	174.9	174.2	160.84	0.413818	0.0721352
ENSG00000197858	GPAA1	167.64	180.48	202.55	171.16	179.1	148.97	163.82	157.48	169.87	0.223542	0.0721406
ENSG00000178401	DNAJC22	0.98	0.84	0.83	1	0.53	0.73	0.63	0.8	0.58	0.155016	0.0723056
ENSG00000174373	RALGAPA1	5.13	5.99	5.09	7.72	5.77	7.52	4.33	5.08	5	0.110588	0.0723295
ENSG00000185875	THNSL1	1.83	2.13	1.72	2.41	2.1	2.26	1.81	2.05	1.69	0.103224	0.0723314
ENSG00000122592	HOXA7	5.32	5.63	4.11	5.62	4.89	6.19	7.91	5.96	7.32	0.287511	0.0723347
XLOC_032534	TCONS_00206473	3.06	2.23	2.22	1.65	2.24	2.22	1.76	0.94	2.09	0.213379	0.0723397
ENSG00000185436	IFNLR1	2.48	2.6	2.87	2.49	2.04	2.2	2.38	2.01	2.02	0.0967069	0.072341
ENSG00000023445	BIRC3	12.53	14.8	13.41	17.24	18.38	24.8	16.43	24.22	15.51	0.0573661	0.0723717
XLOC_026141	TCONS_00169406	4.71	4.66	5.89	4.07	4.89	4.34	3.82	3.92	3.25	0.165726	0.0723829
ENSG00000164494	PDSS2	6.28	5.68	6.2	7.16	5.56	5.85	7.5	6.84	6.32	0.376017	0.072389
ENSG00000217930	PAM16	78.38	83.81	86.42	78.46	79.58	76.31	72.87	80.39	72.2	0.12439	0.0724077
ENSG00000108557	RAI1	15.53	14.61	15.15	14.67	15.23	14.13	13.54	14.11	14.41	0.252764	0.0725224
ENSG00000133619	KRBA1	3.29	2.85	2.6	2.61	2.31	2.97	3.4	3.76	3.7	0.240036	0.0725876
ENSG00000166340	TPP1	34.48	29.78	29.09	33.79	33.02	30.36	31.52	27.85	28.72	0.189173	0.0726271
ENSG00000096063	SRPK1	26.89	26.44	27.31	33.16	28.67	26.8	27.42	30.55	29.92	0.154417	0.072657
ENSG00000213465	ARL2	107.35	117.41	103.71	122.46	114.17	109.24	123.04	119.1	121.23	0.193968	0.0727282
ENSG00000064393	HIPK2	2.1	1.96	2.24	2.23	2.56	2.47	2.33	2.66	2.44	0.0772852	0.0727414
ENSG00000128683	GAD1	7.11	6.69	5.66	8.24	6.71	7.11	8.3	7.83	9.46	0.0917396	0.0727662
ENSG00000143507	DUSP10	1.49	1.94	1.92	2.07	1.17	1.08	1.15	1.4	1.85	0.267458	0.0727996
ENSG00000052802	MSMO1	11.88	14.55	12.9	12.8	13.73	11.38	10.33	14.16	10.21	0.290519	0.072847
ENSG00000102098	SCML2	9.31	9.83	11.37	8.69	8.8	9.38	7.75	9.47	8.76	0.0480433	0.0729143
ENSG00000079335	CDC14A	0.54	0.47	0.52	0.47	0.6	0.53	0.64	0.94	0.72	0.363452	0.0729334
ENSG00000063854	HAGH	86.63	92.7	92.55	86.13	76.91	76.31	84.11	74.51	81.74	0.0855207	0.0729997
ENSG00000169627	BOLA2B	28.92	32.52	28.67	42.13	31.5	27.41	31.75	36.77	29.18	0.262928	0.0730143
ENSG00000120533	ENY2	62.75	66.37	60.19	56.56	69.43	71.79	67.07	66.86	63.2	0.318878	0.0730988
ENSG00000215712	TMEM242	3.58	4.71	4.08	4.4	4.46	4.79	3.87	5.8	4.46	0.168042	0.0731273
ENSG00000142192	APP	323.12	300.43	328.26	299.76	328.39	322.21	306.25	298.28	306.86	0.488667	0.0731324
ENSG00000102871	TRADD	5.56	5.22	5.6	4.92	4.99	4.25	4.66	5.06	5.16	0.0760455	0.0731741
ENSG00000077721	UBE2A	91.94	99.75	87.57	96.66	101.67	94.33	94.72	101.69	95.22	0.0430502	0.0732386
ENSG00000155287	SLC25A28	44.35	38.24	20.92	51.37	45.4	48.9	50.46	52.33	52.11	0.0905275	0.0732898
ENSG00000197024	ZNF398	3.34	2.88	3.12	2.84	2.63	2.87	3.23	2.59	3.05	0.0285955	0.0732911
ENSG00000137834	SMAD6	5.9	6.73	5.95	5.54	5.44	5.52	4.97	4.77	5.59	0.0731319	0.0733762
ENSG00000083817	ZNF416	2.05	1.15	1.56	1.82	2.01	1.85	2.1	1.65	2.1	0.216341	0.0734239
ENSG00000107290	SETX	3.16	3.14	3.39	2.78	3.89	4.31	3.71	3.53	3.45	0.201206	0.0735365
ENSG00000176024	ZNF613	0.49	2.04	0.8	0.55	0.46	0.66	0.44	1.69	0.6	0.198108	0.0735986
ENSG00000172059	KLF11	15.17	16.78	15.17	14.89	14.78	15.02	14.88	14.27	13.48	0.153601	0.0736044
ENSG00000120942	UBIAD1	21.28	20.05	21.63	18.25	18.8	17.81	18.91	19.78	20.02	0.0354558	0.0736823
ENSG00000151611	MMAA	1.21	1.2	0.96	1.2	1.52	1.66	1.24	1.43	1.26	0.12122	0.0736974
ENSG00000186001	LRCH3	9.12	9.54	11.31	8.99	8.27	9.71	7.72	8.44	7.21	0.0769088	0.0737587
ENSG00000103056	SMPD3	0.65	0.42	0.47	0.43	0.25	0.53	0.42	0.39	0.33	0.165074	0.0737923
ENSG00000141499	WRAP53	6.28	7.57	8.68	8.29	7.97	7.42	8.26	8.16	9.29	0.362008	0.0738628
ENSG00000103671	TRIP4	17.55	15.04	13.76	15.01	16.97	16.75	17.88	16.71	14.5	0.342862	0.073872
ENSG00000136869	TLR4	0.24	0.43	0.34	0.38	0.34	0.3	0.21	0.33	0.15	0.483135	0.0739011
ENSG00000135956	TMEM127	18.28	15.16	18.13	17.05	16.96	15.13	15.95	14.95	15.9	0.310845	0.0739556
ENSG00000136933	RABEPK	37.12	36.15	39.66	31.47	33.83	30.64	34.58	35.86	36.56	0.0497633	0.0739745
ENSG00000001630	CYP51A1	34.53	40.9	30.79	34.31	32.67	35.16	30.26	33.53	29.77	0.373639	0.073977
ENSG00000183763	TRAIP	10.5	9.37	8.81	9.53	9.72	9.12	10.87	10.85	11.42	0.416893	0.0741218
ENSG00000120519	SLC10A7	3.68	2.5	3.19	2.75	3.18	3.02	1.78	2.05	2.47	0.395889	0.074148
ENSG00000198160	MIER1	10.24	13.52	10.82	12.59	13.5	15.08	13.47	14.61	11.69	0.108987	0.0741533
ENSG00000185722	ANKFY1	20.78	20.14	15.48	20.89	22.49	23.33	21.75	24.26	22.57	0.13682	0.0741885
ENSG00000165219	GAPVD1	12.48	12.89	13.68	13.16	13.2	14.38	12.36	11.57	12.57	0.023556	0.0742116
ENSG00000162804	SNED1	1.64	1.14	2.26	0.62	0.87	0.62	1.42	0.73	1.25	0.0662699	0.0742657
ENSG00000107758	PPP3CB	9.27	10.7	10.78	10.13	9.18	9.38	8.83	9.91	8.8	0.234321	0.0742915
ENSG00000143036	SLC44A3	3.36	3.17	2.69	4.22	3.14	4.48	4.8	3.32	4.37	0.119189	0.0743616
ENSG00000139926	FRMD6	1.21	1.19	1.09	1.16	1.5	1.3	1.24	1.25	1.1	0.140834	0.0743717
ENSG00000157617	C2CD2	4.79	4.48	5.26	3.75	2.72	3.74	3.69	4.38	4.36	0.0104645	0.0745185
ENSG00000164182	NDUFAF2	42.66	39.78	34.07	45.3	42.6	37.02	43.55	42.46	39.44	0.000513149	0.0746409
ENSG00000122417	ODF2L	6.14	8.18	7.72	8.36	9.81	10.52	6.63	10.05	8.36	0.0112191	0.0747106
ENSG00000115977	AAK1	6.93	5.67	7.17	9.13	8.32	8.72	10.57	9.35	7.49	0.0108372	0.0747231
ENSG00000162878	PKDCC	24.59	19.1	25.52	17.66	17.56	16.41	18.64	18.57	19.37	0.0605911	0.0747428
ENSG00000169223	LMAN2	259.8	247.7	300.52	242.05	256.43	230.12	239.48	241.77	261.92	0.186479	0.0747548
ENSG00000122674	CCZ1	46.98	44.51	43.26	48.6	46.3	45.48	48.77	50.59	45.12	0.00446515	0.0747649
ENSG00000123106	CCDC91	14.12	13.99	11.71	12.96	13.12	12.65	13.02	13.53	9.27	0.317911	0.0748106
ENSG00000125520	SLC2A4RG	112.47	117.71	109.18	133.85	111.56	111.57	115.97	123.15	123.85	0.272672	0.0748967
ENSG00000006468	ETV1	0.41	0.57	0.6	0.79	0.7	0.94	0.55	1.45	1.05	0.0336985	0.074903
ENSG00000111832	RWDD1	18.42	22.04	17	19.74	19.9	16.9	15.29	21.65	15.09	0.394458	0.0749049
ENSG00000107771	CCSER2	3.83	4.12	4.13	4.02	5.18	4.37	4.21	4.99	4.3	0.110151	0.0749798
ENSG00000145354	CISD2	24.54	27.65	23.57	29.92	27.04	30.54	28.44	28.71	24.85	0.116013	0.0750912
ENSG00000173409	ARV1	23.39	23.16	23.15	21.92	21.98	20.3	18.32	22.29	20.71	0.035347	0.0751088
ENSG00000067900	ROCK1	5.1	7.3	5.7	4.79	8.35	8.59	6.93	7.92	6.18	0.160923	0.0751588
ENSG00000105649	RAB3A	2.54	3.06	4.53	2.48	2.99	3.19	2.38	2.1	3.08	0.184066	0.0751712
ENSG00000163257	DCAF16	14.58	14.11	15.09	13.69	12.71	13.87	10.41	13.71	10.34	0.00795145	0.0751933
ENSG00000170175	CHRNB1	6.32	5.12	5.24	5.59	4.74	6.97	6.41	6.2	6.26	0.406576	0.0752079
ENSG00000143398	PIP5K1A	81.94	76.4	91.49	73.55	72.1	72.15	71.37	73.68	72.31	0.0702514	0.0752542
ENSG00000163788	SNRK	4.8	5.78	5.29	4.49	4.92	5.05	4.53	5.02	3.71	0.0693447	0.0752744
ENSG00000138802	SEC24B	5.55	5.01	5.29	5.53	5.11	4.73	5.24	4.74	4.32	0.256568	0.0752835
ENSG00000133247	KMT5C	7.5	7.58	8.19	8.7	5.87	8.22	7.05	5.99	7.69	0.433678	0.0752912
ENSG00000136352	NKX2-1	2.02	1.85	2.55	2.67	2.26	2.6	2.55	2.04	2.68	0.0839281	0.0753608
ENSG00000213123	TCTEX1D2	22.6	24.89	25.68	25.93	26.27	27.54	31.16	26.51	29.48	0.0324226	0.0753987
ENSG00000198055	GRK6	25.86	25.19	30.42	24.97	24.89	23.72	23.14	23.07	22.34	0.163344	0.0754569
ENSG00000144785	RP11-977G19.10	36.24	27.81	19.81	29.85	27.79	18.84	23.58	25.55	13.95	0.170378	0.0755358
ENSG00000164941	INTS8	9.37	10.48	8.66	11.36	7.69	12.34	8.59	10.31	7.33	0.334668	0.0756948
ENSG00000109184	DCUN1D4	13.45	12.98	9.5	11.69	13.56	12.76	14.16	14	12.38	0.339876	0.0757352
ENSG00000088827	SIGLEC1	0.27	0.15	0.37	0.2	0.28	0.28	0.28	0.25	0.44	0.449916	0.0757359
ENSG00000137312	FLOT1	258	247.42	244.83	246.14	246.8	245.48	259.94	256.74	260.44	0.212877	0.0757615
ENSG00000140740	UQCRC2	157.23	150.46	150.2	143.48	145.47	150.96	156.61	143.33	142.47	0.14564	0.0758013
XLOC_007113	TCONS_00044241	0.36	0.79	0.5	0.48	0.19	0.56	0.28	0.15	0.12	0.302797	0.0758173
ENSG00000104129	DNAJC17	33.15	29.53	33.67	33.27	29.81	31.75	33.61	30.69	33.92	0.274289	0.0758361
ENSG00000119285	HEATR1	13.43	13.88	12.07	11.58	14.01	13.88	13.1	13.8	11.48	0.489974	0.075936
ENSG00000103326	CAPN15	21.24	21.89	24.86	20.65	20.27	21.56	20.24	21.33	22.3	0.0727912	0.0759701
ENSG00000099399	MAGEB2	35.47	35.04	34.69	39.56	35.62	36.75	35.8	39.07	38.09	0.079126	0.0759738
ENSG00000120992	LYPLA1	39.36	41.6	42.79	37.53	37.83	41.55	34.03	40.34	33.35	0.0481902	0.0759973
ENSG00000136878	USP20	9.97	8.96	11.21	8.11	7.91	8.52	8.73	8.54	8.66	0.0293593	0.0760174
ENSG00000132109	TRIM21	35.64	31.51	9.35	40.53	42.17	41.16	44.96	45.26	47.81	0.0967439	0.0760196
ENSG00000197013	ZNF429	2.06	2.03	2.61	2.39	1.82	1.38	2.64	2.1	2.96	0.251739	0.0761189
ENSG00000132801	ZSWIM3	1.38	1.71	1.73	1.81	1.41	1.67	1.31	1.4	1.19	0.461709	0.0761404
ENSG00000167034	NKX3-1	1.24	0.63	0.52	1.47	0.94	1.54	1.28	1.14	1.02	0.0870761	0.0762683
ENSG00000102878	HSF4	5.25	5.82	4.86	5.04	4.5	5.02	7.73	6.46	5.69	0.206209	0.0764834
ENSG00000230124	ACBD6	63.5	56.79	60.78	63.69	64.17	65.71	65.19	64.81	63.97	0.0935179	0.0765895
ENSG00000012660	ELOVL5	68.02	68.22	68.77	68.56	64.18	68.09	58.09	67.43	60.51	0.20799	0.0765965
ENSG00000165572	KBTBD6	4.22	4.66	4.93	3.71	4.46	4.42	3.57	4.52	3.81	0.0294588	0.0766829
ENSG00000128294	TPST2	2.82	3.34	4.18	2.38	3.66	2.46	3.11	3.92	4.27	0.205563	0.0766939
ENSG00000073711	PPP2R3A	1.06	1.5	1.38	0.93	1.07	1.01	0.95	1.17	0.7	0.0386986	0.076704
XLOC_000011	TCONS_00000039	2.51	2.37	2.69	2.25	2.6	2.52	2.47	2.1	2.29	0.35063	0.0767506
ENSG00000072736	NFATC3	15.68	15.96	13.98	16.94	16.02	18.48	17.37	18.06	14.15	0.140504	0.0767549
ENSG00000184584	TMEM173	28.56	27.44	20.32	31.79	33.85	37.1	34.37	33.12	39.87	0.0821102	0.0767617
ENSG00000050393	MCUR1	13.54	13.43	12.6	14.82	12.87	15.49	13.14	13.35	11.93	0.175353	0.0767824
ENSG00000145293	ENOPH1	19.35	20.67	19.49	20	22.8	20.72	18.56	20.51	18.16	0.0449863	0.0767839
ENSG00000138386	NAB1	17.73	20.61	19.37	18.48	21.22	23.06	20.48	23.55	19.59	0.117828	0.0768347
ENSG00000176896	TCEANC	1.78	1.4	1.52	1.09	0.96	1	1.63	1.35	1.21	0.00874578	0.0769346
ENSG00000106366	SERPINE1	9.52	8.92	9.13	8.36	7.49	10.16	11.06	9.7	12.94	0.286555	0.0769427
ENSG00000169918	OTUD7A	5.23	5.35	5.95	5.58	5.84	4.96	4.93	3.31	4.9	0.462631	0.0770726
ENSG00000175874	CREG2	3.5	5.72	2.75	8	6.02	6.21	4.8	5.84	4.31	0.080521	0.0771071
ENSG00000165609	NUDT5	104.23	99.75	97.42	100.8	107.94	100.76	104.34	100.96	98.86	0.25352	0.0771206
ENSG00000105290	APLP1	7.4	8.26	9.85	7.53	9.33	7.88	6.21	7.83	7.3	0.401015	0.0771278
ENSG00000144840	RABL3	15.04	14.58	11.46	13.88	13.69	16.66	16.59	15.1	14.68	0.331657	0.0771322
ENSG00000142961	MOB3C	9.29	6.18	5.86	10.31	7.83	10.09	10.38	7.72	10.31	0.0719728	0.0771506
ENSG00000099864	PALM	35.19	39.09	39.78	35.02	34.82	32.17	34.39	34.42	37.63	0.10144	0.0772253
ENSG00000168255	POLR2J3	22.8	22.26	22.06	26.58	21.2	19.04	23.98	22.6	22.41	0.482515	0.0772432
ENSG00000072864	NDE1	25.48	29.03	24.97	24.87	24.18	24.29	23.37	26.38	24.76	0.140858	0.0772691
ENSG00000189337	KAZN	1.47	1.88	2.22	2.58	1.81	1.5	1.44	1.47	1.86	0.430278	0.0773757
ENSG00000213096	ZNF254	2.22	3.11	1.84	2.13	2.64	1.6	1.73	1.38	1.32	0.0686187	0.077414
ENSG00000243147	MRPL33	126.03	143.86	139.36	133.38	122.16	123.41	124.48	122.17	119.09	0.186675	0.0774887
ENSG00000145632	PLK2	57.58	53.99	55.52	61.99	58.14	66.14	64.65	54.65	60.4	0.0470995	0.0775061
ENSG00000165209	STRBP	6.76	7.84	7.94	7.22	6.96	7.11	6.55	6.77	6.14	0.221179	0.0775189
ENSG00000134780	DAGLA	2.49	2.36	2.62	2.49	2.62	2.46	2.58	2.48	2.63	0.405441	0.0775475
ENSG00000120696	KBTBD7	1.34	1.76	1.3	1.45	1.41	1.42	1	1.06	1.19	0.410258	0.0776053
ENSG00000182197	EXT1	18.52	19.03	15.09	20.66	21.24	22.86	22.93	19.34	19.25	0.0813313	0.0777159
ENSG00000205208	C4orf46	10.28	10.14	11.9	10.42	8.95	10.46	9.28	9.59	9.31	0.116294	0.0777427
ENSG00000107902	LHPP	20.39	17.65	21.08	21.97	20.48	18.76	24.86	22.72	21.44	0.348635	0.07778
ENSG00000188542	DUSP28	3.02	1.85	2.08	3.21	3.62	3.32	3.09	2.68	2.69	0.0741999	0.0777904
ENSG00000170315	UBB	828.24	817.74	787.89	747.93	764.32	727.09	732.94	749.72	779.54	0.00748014	0.0778155
ENSG00000165113	GKAP1	6.26	6.53	5.41	5.37	5.78	6.44	6.01	6.22	4.45	0.386698	0.0778169
ENSG00000096872	IFT74	1.77	1.35	1.42	1.28	2.41	1.95	2.17	2.71	1.81	0.252388	0.0778662
ENSG00000155254	MARVELD1	30.23	33.44	28.18	34.72	31.73	33.05	33.88	34.19	34.47	0.177193	0.0778985
XLOC_025930	TCONS_00168140	2.14	2.44	2.83	2.38	1.74	2.07	1.94	2.12	1.95	0.167988	0.0779148
ENSG00000181555	SETD2	7.43	7.92	7.62	6.97	7.64	9.16	7.7	8.4	7.68	0.358444	0.0779189
ENSG00000166913	YWHAB	87.89	83.65	80.69	80.87	83.63	84.94	77.66	82.94	70.79	0.401855	0.0779339
ENSG00000112149	CD83	25.22	22.34	27.23	21.5	20.7	19.98	20.67	21.86	21.24	0.0620593	0.0779469
ENSG00000117139	KDM5B	21.71	19.94	24.32	19.78	19.7	20.51	19.91	19.64	21.46	0.096446	0.0779529
ENSG00000141698	NT5C3B	47.84	44.31	51.26	44.08	45.95	41.82	43.69	43.11	43.05	0.175783	0.078059
ENSG00000080031	PTPRH	1.14	1.1	2.18	0.58	0.81	1.11	0.62	0.96	1.18	0.0537441	0.0780873
ENSG00000143126	CELSR2	7.61	8.13	9.13	8.34	7.64	7.14	7.13	6.49	8.66	0.267793	0.0781267
ENSG00000196821	C6orf106	142.25	134.23	127.05	127.76	128.17	132.36	121.22	126.89	122.07	0.234648	0.0781941
ENSG00000155324	GRAMD3	8.81	8.87	9.51	8.91	8.7	9.82	8.69	8.37	8.59	0.311438	0.0781946
ENSG00000065150	IPO5	88.21	82.64	87.03	78.24	83.88	85.67	78.94	81.34	73.18	0.212704	0.0782971
ENSG00000008735	MAPK8IP2	0.26	0.17	0.28	0.49	0.27	0.37	0.3	0.33	0.58	0.044981	0.0783855
ENSG00000109861	CTSC	53.65	55.89	49.2	60.33	56.11	58.23	54.95	62.97	60.98	0.0906683	0.0784435
ENSG00000197603	C5orf42	8.7	10.97	7.99	8.31	10.6	12.13	8.48	10.14	7.73	0.266281	0.0784882
ENSG00000171861	MRM3	23.53	21.4	21.02	22.34	20.64	21.44	22.32	20.05	20.93	0.20018	0.0785488
XLOC_002179	TCONS_00013603	3.36	3.41	2.81	3.68	3	2.76	2.08	3.29	1.96	0.422651	0.078563
ENSG00000152127	MGAT5	8.28	5.93	6.73	6.45	6.43	5.83	5.81	5	6.2	0.193416	0.0785638
ENSG00000156876	SASS6	3.54	3.91	4.03	3.63	5.45	5.36	4.04	5.23	4.31	0.0804823	0.0787309
ENSG00000106246	PTCD1	6.73	7.49	4.77	9.45	6.01	6.12	7.61	8.23	4.83	0.278669	0.0787767
ENSG00000101213	PTK6	11.66	13.82	12.73	12.22	10.79	10.01	10.7	10.88	11.99	0.135477	0.0787968
ENSG00000109101	FOXN1	1.05	1.2	1.14	1.3	1.12	0.87	1.5	1.25	1.76	0.42334	0.078864
ENSG00000051341	POLQ	2.38	2.22	2.43	2.03	2.28	2.5	1.81	2.17	2.04	0.324533	0.0789473
ENSG00000149806	FAU	286.45	293.31	286.32	288.27	280.67	273.45	287.06	294.89	289.88	0.122808	0.078961
ENSG00000135622	SEMA4F	2.62	2.88	3.25	2.76	2.57	3.78	4.58	3.03	4.72	0.33498	0.0789692
ENSG00000165355	FBXO33	3.47	3.68	4.08	3.42	3.4	2.98	2.87	3.5	2.86	0.136672	0.0790136
ENSG00000129128	SPCS3	21.1	19.86	17.33	17.67	18.74	18.57	17.76	16	17.08	0.24956	0.0791782
ENSG00000116337	AMPD2	23.56	22.64	25.74	24.76	22.03	20.59	19.51	21.44	24.62	0.252705	0.0792081
ENSG00000204176	SYT15	0.28	0.34	0.51	0.15	0.23	0.45	0.44	0.49	0.52	0.0203529	0.0792387
ENSG00000187796	CARD9	0.69	0.38	0.61	0.62	0.3	0.35	0.39	0.36	0.29	0.0786386	0.0792387
ENSG00000171224	C10orf35	6.79	6.6	6.38	6.89	5.97	6.21	5.2	4.84	6.27	0.1939	0.0793406
ENSG00000141385	AFG3L2	67.93	56.43	62.82	56.74	61.67	66.13	66.71	55.22	58.57	0.440423	0.0793498
ENSG00000130147	SH3BP4	13.24	11.45	12.83	10.9	13.13	13.61	11.62	11.35	11.25	0.488392	0.0794373
ENSG00000105856	HBP1	30.91	29.04	27.94	27.62	29.32	41.38	30.53	28.05	25.7	0.282445	0.0795076
ENSG00000198467	TPM2	198.37	208.33	214.69	214.63	184.05	184.81	194.39	194.93	211.02	0.23822	0.0795405
ENSG00000088876	ZNF343	4.97	5.7	6.9	6.23	4.39	4.07	4.27	3.5	6.34	0.252816	0.0795568
ENSG00000172007	RAB33B	2.71	4.54	3.6	2.66	2.97	3.31	2.59	3.51	2.13	0.154821	0.0795707
ENSG00000159217	IGF2BP1	12.14	12.44	6.52	11.85	9.45	12.81	12.91	14.51	11.15	0.375345	0.0796309
ENSG00000140263	SORD	20.52	22.4	18.78	23.34	18.99	18.78	19.07	20.07	18.55	0.46151	0.0796646
ENSG00000103479	RBL2	7.85	8.26	8.57	9.28	7.51	9.38	7.8	7.43	7.83	0.261903	0.0798651
ENSG00000149809	TM7SF2	7.92	9.23	8.5	7.88	5.82	6.12	5.55	9.01	6.98	0.095304	0.0798863
ENSG00000171603	CLSTN1	94.45	90.89	110.47	83.97	94.23	89.93	89.4	86.09	93.13	0.157055	0.0799798
ENSG00000143365	RORC	8.87	8.32	8.05	8.49	8.37	8.71	9.49	9.24	10.73	0.375183	0.0800078
ENSG00000164219	PGGT1B	5.12	4.77	5.6	7.19	4.91	5.92	3.33	4.37	2.31	0.152093	0.0800222
ENSG00000215251	FASTKD5	9.5	8.78	8.7	7.84	8.42	8.86	9.44	7.94	8.07	0.185286	0.0800442
ENSG00000103995	CEP152	1.85	1.95	2.23	1.95	1.9	2.61	1.55	1.74	1.34	0.186624	0.0800621
ENSG00000269897	COMMD3-BMI1	6.97	8.11	12.67	12.39	14.8	9.22	15.33	14.4	13.26	0.230481	0.0801544
ENSG00000025708	TYMP	6.88	5.79	5.39	9.19	9.65	8.78	7.83	9.8	6.73	0.010055	0.0803155
ENSG00000143442	POGZ	13.68	12.9	13.67	14.35	13.78	13.77	20.98	15.14	15.56	0.0710971	0.0805487
ENSG00000081479	LRP2	0.6	0.58	0.87	0.77	0.62	1.01	0.59	0.47	0.8	0.0486031	0.0805648
ENSG00000137273	FOXF2	7.79	7.88	10.91	9.38	8.18	8.34	7.09	6.77	7.75	0.435363	0.0806951
ENSG00000167904	TMEM68	12.05	11.56	16.5	14.34	13.2	12.67	9.79	10.44	10.72	0.493928	0.0807
ENSG00000003096	KLHL13	19.06	20.73	15.98	19.96	17.04	19.27	14.69	16.47	15.74	0.471276	0.0807565
ENSG00000116120	FARSB	29.57	28.39	26.35	28.01	25.7	24.92	26.17	26.48	25.97	0.0209355	0.0807896
ENSG00000154229	PRKCA	11.4	11.35	10.5	11.26	10.07	10.59	9.76	8.95	10.31	0.202552	0.0808148
ENSG00000148925	BTBD10	12.36	11.88	11.91	11.72	11.77	12.73	11.63	11.16	11.87	0.480681	0.0808185
ENSG00000104213	PDGFRL	0.51	0.23	0.38	0.5	0.47	0.72	0.67	1.11	0.74	0.104738	0.0808308
ENSG00000063322	MED29	21.74	20.94	20.37	23.8	20.74	22.4	20.14	20.6	19.79	0.11265	0.0808375
ENSG00000063660	GPC1	22.66	22.58	26.02	23.29	23.68	21.36	20.78	22.21	22.68	0.324858	0.0809209
ENSG00000181192	DHTKD1	27.26	27.98	28.47	29.28	27.21	28.97	26.48	24.57	27.31	0.272323	0.0809366
ENSG00000152133	GPATCH11	3.33	3.61	3.46	2.93	2.89	2.84	2.21	3.55	2.41	0.0127713	0.0810017
ENSG00000159200	RCAN1	8.33	9.29	6.91	8.11	9.19	9.69	9.52	9.95	10.12	0.245513	0.0810443
ENSG00000136286	MYO1G	0.46	0.54	0.23	0.67	0.62	0.62	0.65	0.84	1.09	0.0638875	0.0811491
ENSG00000175745	NR2F1	17.74	18.52	17.37	16.7	15.42	16.71	17.18	15.07	15.85	0.0846084	0.0811543
ENSG00000132938	MTUS2	0.41	0.33	0.51	0.53	0.38	0.35	0.4	0.15	0.32	0.485997	0.0811766
ENSG00000148842	CNNM2	9.42	9.7	10.24	12.11	11.43	11.53	11.45	10.91	10.44	0.022033	0.0812965
ENSG00000214717	ZBED1	43.04	42.12	41.59	38.03	40.97	42.08	37.83	41.69	38.17	0.183014	0.0813377
ENSG00000198586	TLK1	9.46	9.87	7.8	10.54	11.47	11.16	10.83	11.64	7.91	0.0500449	0.0813427
ENSG00000135932	CAB39	10.22	11.82	10.03	9.56	10.59	9.91	10.08	11.03	8.67	0.0858513	0.0813437
ENSG00000120656	TAF12	23.18	21.57	20.17	18.82	18.02	17.08	19.34	19.9	19.54	0.00504773	0.0814275
ENSG00000157557	ETS2	58.97	54.33	56.19	57.48	53.38	53.44	56.59	54.21	53.98	0.0416603	0.081651
ENSG00000204604	ZNF468	1.82	0.49	1.19	1.11	1.08	0.43	0.83	0.44	0.28	0.287551	0.0816683
ENSG00000138078	PREPL	15.73	18	18.02	14.44	17.52	16.93	15.45	14.27	13.28	0.029763	0.0816732
XLOC_032097	TCONS_00204089	0.53	0.36	0.37	0.48	0.21	0.34	0.49	0.11	0.26	0.0874398	0.0816961
ENSG00000185818	NAT8L	2.38	2.71	2.92	2.3	2.81	2.09	2.35	2.11	2.34	0.221575	0.0817028
ENSG00000164144	ARFIP1	8.39	10.67	9.46	9.93	10.2	9.37	7.55	10.22	7.21	0.324572	0.0817811
ENSG00000184545	DUSP8	8.95	10.62	9.36	7.8	8.22	7.63	6.44	7.28	9.15	0.0198111	0.0818179
ENSG00000142655	PEX14	15.12	15.11	14.2	14.86	15.79	14.5	15.67	15.91	16.6	0.236035	0.0818595
ENSG00000185585	OLFML2A	4.21	4.27	5.24	4.71	3.85	3.56	4.13	2.91	4.18	0.243748	0.0819094
ENSG00000085415	SEH1L	21.66	21.12	21.49	19.86	20.25	21.64	19.01	20.76	20.2	0.137148	0.0819414
ENSG00000152684	PELO	19.66	19.41	15.62	18.13	18.94	18.65	20.28	21.63	20.19	0.413231	0.0820773
ENSG00000119048	UBE2B	49.18	67.02	52.33	51.09	54.05	59.35	48.17	60.2	49.2	0.421576	0.0821396
ENSG00000055208	TAB2	18.34	17.76	18.41	17.75	16.84	18.64	17.28	17.22	15.62	0.169161	0.082173
ENSG00000235109	ZSCAN31	5.27	3.97	5.86	4.2	4.44	3.66	3.22	3.76	2.9	0.175535	0.0821973
ENSG00000099804	CDC34	60.42	59.83	72.51	56.65	61.33	52.13	57.73	56.5	61.69	0.185346	0.0822213
ENSG00000137767	SQRDL	41.76	46.57	28.2	48.73	46.94	50.53	51.22	52.04	54.61	0.133903	0.0824627
ENSG00000020256	ZFP64	13.82	15.87	13.46	14.8	12.06	12.4	12.07	13.23	13.26	0.224385	0.0824946
ENSG00000116128	BCL9	6.79	7.54	5.59	5.77	4.54	7.76	8.75	8.68	5.78	0.360942	0.0825989
ENSG00000138246	DNAJC13	5.96	7.32	4.9	6.88	8.33	8.82	7.42	7.41	6.67	0.0931952	0.0826167
ENSG00000176386	CDC26	19.31	20.69	21.06	18.91	17.64	17.46	18.2	19.04	20.94	0.0702098	0.0826876
ENSG00000090686	USP48	15.11	14.95	15.08	16.06	16.07	17.5	12.95	14.85	12.86	0.0421217	0.0826876
ENSG00000167785	ZNF558	5.56	4.23	5.43	5.98	5.17	4.83	4.69	4.09	3.95	0.315889	0.0826915
ENSG00000100601	ALKBH1	8.1	7.62	7.51	7.47	7.48	7.21	8.61	7.82	8.72	0.0659863	0.0827112
ENSG00000273559	CWC25	5.8	5.67	4.98	5.88	6	5.89	5.96	5.95	5.76	0.107685	0.0827395
ENSG00000144026	ZNF514	2.44	1.37	2.02	2.42	2.12	1.85	2.64	2.33	2.36	0.289859	0.0827922
ENSG00000177873	ZNF619	1.9	2.69	2.37	3.39	1.86	1.72	2.07	2.79	2.85	0.498418	0.0827922
ENSG00000130589	HELZ2	79.48	83.3	26.44	104.87	103.26	99.33	113.45	100.39	116.16	0.0718641	0.0829514
ENSG00000162972	C2orf47	16.59	17.33	14.18	18.19	18.75	16.57	18.89	17.7	18.11	0.0131103	0.0829642
ENSG00000135392	DNAJC14	22.13	23.81	20.35	25.53	20.77	24.58	24.56	24.05	23.88	0.286991	0.0830191
ENSG00000168591	TMUB2	30.08	28.26	29.25	29.33	27.15	28.39	30.8	30.55	34.25	0.00676051	0.0831008
ENSG00000172339	ALG14	2.31	2.14	3.68	1.79	2.96	3.49	1.48	1.81	1.69	0.467905	0.0831188
ENSG00000146476	ARMT1	13.99	12.24	14.03	11.59	12.42	12.42	11.22	11.68	8.89	0.11817	0.0831546
ENSG00000184908	CLCNKB	0.26	0.34	0.14	0.25	0.4	0.5	0.3	0.4	0.32	0.175826	0.0831561
ENSG00000141503	MINK1	37.99	37.37	33.91	41.05	37.49	38.93	39.96	39.81	41.92	0.0974491	0.0831969
ENSG00000115363	EVA1A	2.16	2.09	2.24	2.4	4.26	2.57	2.51	2.47	3.57	0.141776	0.0832179
ENSG00000196937	FAM3C	15.55	16.9	15.66	14.75	16.42	16.75	16.38	18.34	19.71	0.461771	0.0832534
ENSG00000070669	ASNS	301.76	276.68	292.86	273.57	257.26	260.86	265.57	269.06	280.27	0.00956735	0.0832552
XLOC_022003	TCONS_00143797	0.63	0.48	0.61	0.17	0.52	0.52	0.39	0.1	0.58	0.18704	0.083436
ENSG00000111859	NEDD9	13.1	13.24	10.65	9.52	10.5	11.91	10.9	10.1	10.45	0.187951	0.0834412
ENSG00000196975	ANXA4	58.07	50.96	48.14	59.67	52.08	63.55	58.67	56.27	56.29	0.163066	0.0835318
ENSG00000047648	ARHGAP6	0.56	0.79	0.6	0.46	0.28	0.38	0.37	0.43	0.56	0.0754462	0.0835974
ENSG00000186446	ZNF501	0.23	0.25	0.6	0.65	0.36	0.53	0.7	0.66	0.62	0.198047	0.0836545
ENSG00000101608	MYL12A	169.31	172.36	138.63	172.65	178.37	173.44	174.32	189.41	175.22	0.140728	0.0837763
ENSG00000225968	ELFN1	0.45	0.6	0.38	0.74	0.48	0.46	0.68	0.61	0.63	0.277176	0.0837881
ENSG00000164649	CDCA7L	13.72	10.2	13.82	12.68	11.42	12.57	9.72	9.33	12.48	0.348055	0.0838022
ENSG00000275074	NUDT18	2.4	1.88	2.17	2.33	1.95	1.62	1.75	1.79	1.87	0.21589	0.0839068
ENSG00000263528	IKBKE	2.04	2.57	1.18	1.9	2.71	2.69	2.13	3.78	2.82	0.213775	0.0839782
ENSG00000178821	TMEM52	0.92	0.87	1.2	0.3	0.23	0.51	0.77	0.71	0.63	0.000512033	0.0840533
ENSG00000123728	RAP2C	15.51	18.7	18	17.71	17.08	17.2	16.47	32.27	26.86	0.477691	0.0840943
ENSG00000102221	JADE3	12.18	13.76	12.9	13.92	12.27	14.47	13.1	14.52	12.94	0.310818	0.0841478
ENSG00000204019	CT83	28.97	27.6	25.28	28.41	27.63	29.33	30.3	33.79	27.36	0.251473	0.0841532
ENSG00000131746	TNS4	9.45	9.31	10.87	10.84	10.24	10	11.86	9.5	12.36	0.277963	0.0842336
ENSG00000187522	HSPA14	27.88	28.74	25.75	26.57	27.66	26.45	27.47	25.85	20.91	0.234344	0.0842551
ENSG00000153823	PID1	0.95	0.61	1.03	0.32	0.64	0.79	0.74	0.51	0.48	0.140671	0.0842645
ENSG00000196150	ZNF250	4.62	4.01	4.88	2.91	3.49	4	3.56	3.91	3.32	0.0493549	0.084267
ENSG00000133142	TCEAL4	93.3	93.56	92.09	91.68	100.73	98.91	91.71	91.61	85.58	0.143879	0.0843161
ENSG00000175662	TOM1L2	10.7	10.63	10.82	9.84	9.47	10.18	8.99	9.79	10.61	0.0138468	0.0843185
ENSG00000133627	ACTR3B	7.25	6.75	7.12	5.93	6.62	7.56	9	7.67	7.31	0.291363	0.0843269
ENSG00000124782	RREB1	13.13	14.3	16.79	12.4	13.55	13.24	12.66	12.09	12.54	0.107671	0.0843737
ENSG00000085224	ATRX	6.63	7.04	8.54	4.65	9.8	11.71	11.05	8.13	9.85	0.254579	0.0843991
ENSG00000001036	FUCA2	91.82	89.45	88.9	88.47	90.49	89.12	84.62	89.17	82.65	0.328336	0.0844677
ENSG00000142166	IFNAR1	17.89	15.59	16.29	18.67	16.21	19.45	15.07	15.42	12.66	0.102713	0.0845412
ENSG00000159210	SNF8	116.96	119.08	92.21	126.79	117.87	108.95	127.98	123.01	117.95	0.123618	0.0845622
ENSG00000171223	JUNB	332.4	337.73	353.02	379.6	307.23	322.81	346.1	349.4	399.88	0.438874	0.0846165
ENSG00000006118	TMEM132A	19.54	20.88	23.15	22.91	25.41	20.54	23.37	21.02	26.59	0.254492	0.084641
ENSG00000137509	PRCP	43.52	39.08	45.05	41.91	41.23	42.89	41.45	39	42.8	0.364321	0.0846942
ENSG00000163947	ARHGEF3	6.89	7.54	5.66	9.89	8.3	9.52	7	9.57	8.2	0.0553856	0.084742
ENSG00000103353	UBFD1	28.77	28.22	25.06	43.79	46.9	40.4	41.5	32.11	28.07	0.00254329	0.0847714
ENSG00000092010	PSME1	166.54	146.79	170.42	151.71	171.63	173.15	174.99	179.61	179.67	0.373438	0.0848601
XLOC_004678	TCONS_00027055	1.26	1.16	1.14	0.86	0.81	0.87	0.82	1.12	0.89	0.00608657	0.0848787
ENSG00000188372	ZP3	13.87	13.63	14	11.6	13.54	12.02	13.8	12.56	12.57	0.0842591	0.0849242
ENSG00000095139	ARCN1	100.95	89.68	89.65	86.24	94.67	93.26	89.38	88.26	84.04	0.389398	0.0849456
ENSG00000271503	CCL5	78.47	59.25	70.58	71.55	77.92	73.67	86.93	95.77	81.9	0.287393	0.0849632
ENSG00000111875	ASF1A	10.99	11.42	9.49	11.64	13.68	11.84	11.51	13.39	10.03	0.0432665	0.0850281
ENSG00000136738	STAM	18.3	15.87	18.17	15.27	14.61	15.28	14.37	15.73	14.72	0.0259948	0.0850329
ENSG00000130283	GDF1	0.4	0.43	0.48	0.37	0.38	0.34	0.37	0.33	0.26	0.0812372	0.0850937
ENSG00000104884	ERCC2	15	11.29	13.77	13.59	12.27	11.85	10.02	10.33	11.98	0.236634	0.0850995
ENSG00000168477	TNXB	1.09	1.37	1.13	2.33	1.1	1.51	1.35	2.13	2.89	0.205817	0.0851837
ENSG00000161980	POLR3K	28.6	29.46	26.32	25.57	27.24	23.01	28.12	27.58	25.79	0.00643333	0.0852271
ENSG00000263001	GTF2I	73.48	78.66	71.51	78.86	71.07	84.49	70.61	74.93	59.27	0.305317	0.0852683
ENSG00000163820	FYCO1	5.52	5.67	6.1	5.78	5.92	6.57	6.45	5.7	7.05	0.0224906	0.0853661
ENSG00000182858	ALG12	11.27	10.62	10.96	13.07	13.07	10.39	11.33	12.27	12.35	0.156553	0.0853688
ENSG00000214510	SPINK13	2.37	2.06	3.75	2.47	3.57	3.62	3.28	3.23	3.8	0.218715	0.0854022
ENSG00000167264	DUS2	11.26	11.76	10.43	13.74	9.04	9.93	14.19	12.67	11.1	0.442493	0.0854226
ENSG00000177000	MTHFR	6.3	5.79	5.36	7.01	5.83	5.85	6.36	6.58	6.48	0.0855044	0.0854716
ENSG00000105287	PRKD2	12.81	14.48	6.26	15.09	18.78	18.16	20.95	16.19	22.1	0.0850679	0.0854872
ENSG00000161653	NAGS	0.68	0.49	0.29	0.62	0.27	0.65	0.36	0.19	0.28	0.445807	0.0854904
ENSG00000174928	C3orf33	3.43	4.64	3.88	4.29	3.46	3.66	3.11	3.62	3.65	0.394431	0.0855254
ENSG00000146729	GBAS	31.27	34.13	34.96	32.08	29	32.72	30.25	31.6	28.68	0.165187	0.0855516
ENSG00000129562	DAD1	215.06	228.82	213.83	205.55	209.4	201.59	203.58	208.94	212.15	0.0216905	0.0856357
ENSG00000173207	CKS1B	280.38	281.86	229.66	287.24	278.76	276.58	289.56	299.76	278.81	0.192129	0.0856383
ENSG00000119632	IFI27L2	9.87	8.73	9.5	8.74	13.57	10.07	10.99	11.2	15.94	0.253029	0.0856457
ENSG00000250151	ARPC4-TTLL3	4.19	2.89	4.94	1.91	1.96	2.44	4.04	2.24	3.63	0.0302592	0.0856623
ENSG00000166897	ELFN2	2.51	2.65	3.71	2.64	2.22	2.62	2.43	2.11	2.77	0.159645	0.0857155
ENSG00000106554	CHCHD3	71.12	64.59	72	64.08	60.79	66.3	58.65	64.18	58.48	0.0139285	0.0857524
ENSG00000107949	BCCIP	23.92	24.62	20.76	21.77	22.72	25.37	23.79	21.97	17.42	0.470229	0.0858242
ENSG00000259431	THTPA	18.59	16.64	13.85	16.61	14.81	16.46	20.25	20.04	23.02	0.407686	0.0858985
ENSG00000154188	ANGPT1	0.87	1.65	0.56	0.93	1.06	1.01	0.59	1.33	0.55	0.468978	0.0859813
ENSG00000150687	PRSS23	71.79	66.79	82.54	62.59	60.49	56.05	60.09	64.96	61.7	0.0782529	0.0860698
ENSG00000154174	TOMM70	33.08	32.4	36.31	33.37	28.72	30.03	29.84	30.64	27.13	0.116794	0.0862232
ENSG00000273802	HIST1H2BG	0.6	0.47	0.79	0.88	0.83	0.89	0.67	0.77	0.88	0.0424771	0.0862399
ENSG00000176209	SMIM19	15.56	16.41	12.55	20.61	18.29	17.02	18.17	17.95	20.22	0.0299573	0.0862556
ENSG00000132017	DCAF15	14.38	13.53	11.02	12.69	13.31	15.74	14.71	17.56	16.97	0.338355	0.0862831
ENSG00000213853	EMP2	31.63	32.97	30.42	30.34	28.68	31.75	31.56	30.41	27.83	0.237457	0.0862861
ENSG00000114030	KPNA1	52.58	47.49	43.77	52.91	54.66	52.61	53.47	52.59	53.22	0.0857593	0.086351
ENSG00000198034	RPS4X	993.37	1034.1	991.49	955.36	1006.73	984.22	974.65	984.78	982.96	0.0575445	0.0863675
ENSG00000126709	IFI6	1617.94	1128.59	1759.55	1479.97	2072.51	1735.52	2161.99	2075.86	1837.42	0.263458	0.0863743
ENSG00000100802	C14orf93	7.56	6.84	5.08	7.06	6.83	9.02	7.62	9.11	7.25	0.250692	0.0864152
ENSG00000068650	ATP11A	17.63	20.27	18.34	17.77	15.39	17.08	16.29	16.46	17.61	0.156474	0.086423
ENSG00000017797	RALBP1	18.33	19.42	17.74	20.72	20.45	20.61	18.31	18.76	17.01	0.0313257	0.0864871
ENSG00000148339	SLC25A25	20.51	19.92	19.93	17.47	16.86	16.9	17.73	17.8	19.82	4.19876e-06	0.0865273
ENSG00000116641	DOCK7	6.26	6.18	6.61	5.61	10.5	6.55	8.47	8.44	15.06	0.261477	0.0865955
ENSG00000162852	CNST	10.68	10.87	10.78	10.03	9.02	7.89	7.22	8.71	10.55	0.0544773	0.086633
ENSG00000112742	TTK	6.92	8.15	5.84	5.31	8.76	7.76	6.86	6.36	4.4	0.397017	0.0867291
ENSG00000090530	P3H2	52.3	47.57	49.42	47.28	46.74	44.72	45.81	44.18	48.78	0.0603219	0.0868188
ENSG00000180370	PAK2	43.24	37.02	36.07	37.53	34.29	41.24	36.29	35.62	33.74	0.384491	0.0868702
ENSG00000164134	NAA15	10.16	11.56	10.77	10.79	13.47	14.97	10.43	13.5	11.61	0.0821797	0.0868756
ENSG00000162910	MRPL55	51.79	52.14	46.71	54.54	47.95	50.33	56.49	52.29	52.15	0.39821	0.0869013
ENSG00000156265	MAP3K7CL	2.12	2.14	1.76	4.31	2.34	2.23	2.26	3.74	2.64	0.132862	0.0870199
ENSG00000167925	GHDC	20.33	20.48	21.57	18.85	17.7	20.08	18.32	18.68	21.52	0.0235827	0.0870919
ENSG00000189362	NEMP2	4.19	4.57	3.06	7.72	4.72	5.63	4.32	6.58	4.31	0.0870421	0.0871805
ENSG00000163171	CDC42EP3	5.64	5.6	5.15	6.88	6.96	6.7	6.4	7.21	5.34	0.00211454	0.0872557
ENSG00000250021	C15orf38-AP3S2	30.51	28.25	26.94	29.13	27.12	25.79	30.64	32	31.48	0.00214725	0.0873203
ENSG00000151665	PIGF	9.8	11.41	8.61	11.29	10.06	10.41	10.46	11.43	9.38	0.292476	0.0873415
ENSG00000172667	ZMAT3	9.18	9.22	8.55	9.78	7.98	10.52	7.11	8.51	8.15	0.340282	0.0873539
ENSG00000103061	SLC7A6OS	9.68	7.67	8.45	8.63	6.76	8.54	10.33	9.73	8.89	0.1123	0.0875083
ENSG00000177556	ATOX1	25.71	29.95	20.78	28.46	27.36	26.65	27.81	33.75	31.79	0.250633	0.0875415
ENSG00000186951	PPARA	6.69	4.46	3.73	3.21	3.92	2.93	2.73	3.83	2.18	0.114713	0.0876984
ENSG00000183648	NDUFB1	107.69	122.22	100.15	94.14	111.02	101.98	106.95	108.23	90.92	0.125653	0.0877246
ENSG00000118690	ARMC2	1.18	0.8	0.88	0.61	0.62	1.23	0.59	0.62	0.75	0.333299	0.0878665
ENSG00000187626	ZKSCAN4	2.79	3.45	3.31	2.65	2.56	2.68	2.76	2.42	2.49	0.0641107	0.0878857
ENSG00000258643	BCL2L2-PABPN1	17.54	12.32	17.64	11.45	10.11	9.6	12.53	11.96	14.71	0.0431699	0.0879638
ENSG00000174669	SLC29A2	8.63	8.43	9.91	7.82	7.45	6.62	7.23	8.39	8.24	0.0842307	0.0880921
ENSG00000100485	SOS2	3.18	2.99	3.43	2.65	3.4	3.49	2.72	2.92	2.59	0.474254	0.0881482
XLOC_003955	TCONS_00022901	0.66	0.41	0.79	1.12	0.42	0.39	0.15	0.31	0.62	0.466856	0.088217
ENSG00000213516	RBMXL1	2.87	4.24	3.09	4.17	2.31	4.66	2.81	3.01	2.27	0.403333	0.0883019
ENSG00000080298	RFX3	0.7	0.7	0.4	0.46	0.17	0.37	0.17	0.45	0.34	0.103591	0.088354
ENSG00000125944	HNRNPR	109.15	117.5	97.76	98.78	111.57	117.14	107.86	109.06	94.42	0.460945	0.0884642
ENSG00000158201	ABHD3	20.8	27.23	17.14	19.86	20.17	25.3	19.13	19.98	15.04	0.495736	0.0884898
ENSG00000179979	CRIPAK	0.63	0.35	0.64	0.84	0.55	0.8	0.78	0.38	0.94	0.00320076	0.0885244
ENSG00000183283	DAZAP2	108.11	98.9	99.93	109.79	107.09	89.57	90.48	95.44	94.1	0.489375	0.0885797
ENSG00000163607	GTPBP8	18.81	17.35	11.43	18.76	18.09	18.32	19.52	18.93	15.68	0.18424	0.0886353
ENSG00000180304	OAZ2	62.87	64.98	68.81	66.34	59.2	61.58	58.97	62.03	68.69	0.221413	0.0886619
ENSG00000173812	EIF1	1088.93	1010.82	1087.35	980.88	1010.09	986.01	1002.1	1008.35	1020.24	0.0905436	0.0886676
ENSG00000125037	EMC3	46.96	46.43	37.8	50.01	52.73	47.85	50.47	47.36	45.54	0.04273	0.0887367
ENSG00000111666	CHPT1	27.28	26.72	30.38	24.65	24.52	25.16	25.55	25.88	25.57	0.0354701	0.0887384
ENSG00000266412	NCOA4	48.22	51.57	43.7	47.83	48.24	49.55	46.7	49.13	43.56	0.408808	0.0887711
ENSG00000110066	KMT5B	9	9.41	9.89	9.39	9.27	8.87	8.3	9	7.78	0.298103	0.0888064
ENSG00000114378	HYAL1	18.74	20.74	23.83	17.56	15.35	15.7	18.6	15.96	17.91	0.0681132	0.0888073
ENSG00000108187	PBLD	3.36	4.34	2.39	5.98	4.92	4.72	4.45	4.73	5.08	0.0508018	0.0889492
ENSG00000139514	SLC7A1	43.54	42.12	43.91	42.03	44.69	41.9	44.64	42.32	46.06	0.423719	0.0890235
ENSG00000079313	REXO1	9	9.77	9.95	9.55	9.59	9.33	9.07	11.64	12.41	0.414907	0.0890556
ENSG00000023171	GRAMD1B	23.21	24.08	26.24	25.81	24.63	22.67	20.83	24.04	23.58	0.472758	0.089171
ENSG00000182196	ARL6IP4	135.72	128.28	120.5	125.45	128.56	128.09	137.85	132.52	132.52	0.445761	0.0891914
ENSG00000005486	RHBDD2	56.28	56.59	62.6	59.01	59.16	55.01	60.71	56.76	65.69	0.421911	0.0892003
ENSG00000198774	RASSF9	0.62	0.72	0.93	0.48	0.66	0.68	0.53	0.65	0.62	0.056257	0.0892336
ENSG00000168092	PAFAH1B2	24.25	23.94	27.86	20.87	23	22.7	21.43	22.4	19.57	0.0614133	0.0892721
ENSG00000174839	DENND6A	5.62	7.58	5.98	7.99	7.38	7.64	6.03	11.18	7.64	0.118806	0.0893077
ENSG00000168769	TET2	1.7	1.76	1.4	1.66	1.79	2	1.87	1.82	1.43	0.217117	0.0893144
ENSG00000112658	SRF	15.35	14.78	17.23	15.11	13.34	13.39	14.73	14.53	15.62	0.112115	0.0893274
ENSG00000258311	RP11-644F5.10	1.4	0.43	1.8	1.51	0.59	1.55	3.32	1.78	1.87	0.481761	0.0893892
ENSG00000145390	USP53	3.52	3.02	3.1	3.15	1.6	2.83	3.12	2.53	1.37	0.101439	0.0894002
ENSG00000173852	DPY19L1	5.55	6.59	8.33	4.64	5.85	6.43	5.19	4.57	4.38	0.0410402	0.0894714
ENSG00000171208	NETO2	20.56	17.85	15.07	17.23	15.58	16.9	13.77	15.63	13.75	0.254119	0.0895162
ENSG00000167632	TRAPPC9	10.59	11.37	11.01	10.59	10.91	11.12	10.06	9.36	10.51	0.286379	0.0895338
ENSG00000205138	SDHAF1	14.71	14.44	17.71	13.88	13.27	13.21	14.09	13.25	14.27	0.102722	0.0895546
ENSG00000276966	HIST1H4E	1.44	0.64	1.25	1.05	0.85	1.03	1.6	1.71	1.67	0.266525	0.0895827
ENSG00000078081	LAMP3	12.98	5.74	7.87	8.32	13.48	12.57	13.26	11.97	11.97	0.279468	0.0896144
ENSG00000044459	CNTLN	3.6	3.88	3.2	3.78	3.7	4.2	4.06	3.95	4.06	0.220247	0.0896329
ENSG00000114988	LMAN2L	11.23	11.7	14.04	12.13	9.97	10.6	10.22	11.11	10.97	0.188278	0.0896512
ENSG00000095739	BAMBI	20.01	18.49	21	21.02	21.35	20.55	20.3	21.89	22.78	0.178026	0.0897179
ENSG00000115694	STK25	43.19	43.81	48.84	50.02	36.01	41.28	42.92	41.2	47.59	0.308094	0.0898003
ENSG00000111144	LTA4H	26.76	25.82	25.11	26.94	27.52	27.72	27.65	29.73	26.22	0.084569	0.0899664
ENSG00000111786	SRSF9	110.86	118.12	117.82	123.3	119.43	114.56	120.83	120.47	120.55	0.265739	0.0901655
ENSG00000135241	PNPLA8	7.32	8.88	9.18	8.62	6.9	8.91	6.97	7.34	5.89	0.384964	0.0902524
ENSG00000135119	RNFT2	1.36	1.39	0.81	0.96	1.46	1.14	1.69	1.48	1.56	0.5	0.0902674
ENSG00000187555	USP7	31.27	27.74	31.46	27.79	28.75	30.06	27.62	27.42	25.49	0.212413	0.0903563
ENSG00000110881	ASIC1	6.09	5.69	7.36	6.06	6.08	4.79	5.88	5.2	6.04	0.254588	0.0903842
ENSG00000180228	PRKRA	31.77	31.21	30.07	31.59	31.78	30.84	27.41	29.21	29.59	0.156474	0.0904118
ENSG00000115084	SLC35F5	14.85	17.28	15.28	16.03	16.35	14.56	14.4	16.31	12.58	0.418563	0.0904516
ENSG00000110768	GTF2H1	24.09	22.68	22.01	21.22	22.41	25.83	21.18	22.66	18.95	0.458982	0.0905179
ENSG00000114450	GNB4	7.06	6.23	5.19	6.89	8.35	8.1	7.45	7.75	5.57	0.11076	0.0905672
ENSG00000154451	GBP5	0.34	0.36	0.23	0.35	0.61	0.73	0.68	0.4	0.38	0.1076	0.0906573
ENSG00000131473	ACLY	75.64	77.22	81.84	72.03	73.44	71	74.78	70.5	79.01	0.0627069	0.0907036
ENSG00000140853	NLRC5	33.88	31.55	17.88	36.23	42.71	38.88	41.66	39.15	48.3	0.0831206	0.0907447
ENSG00000170456	DENND5B	13	12.41	13.37	13.26	12.25	14.29	12.99	11.08	12.19	0.196235	0.0908616
XLOC_014066	TCONS_00091220	0.65	0.78	0.49	0.64	0.59	0.34	0.31	0.54	0.48	0.0829786	0.0908693
ENSG00000214944	ARHGEF28	2.88	2.63	2.03	2.49	2.65	3.15	2.23	2.44	1.89	0.317468	0.0908989
ENSG00000108846	ABCC3	36.79	39.18	31.92	35.47	38.35	35.92	39.86	40.74	40.84	0.375605	0.0909123
ENSG00000147852	VLDLR	5.17	6.17	8.61	5.65	6.84	5.59	4.94	4.3	5.24	0.327557	0.0910163
ENSG00000140043	PTGR2	7.65	6.73	7.12	7.46	10.98	6.33	8.12	9.81	8.28	0.281841	0.0910293
ENSG00000184432	COPB2	88.63	87.32	91.51	95.49	93.13	90.58	75.23	87.1	74.89	0.125011	0.0911271
ENSG00000155876	RRAGA	42.82	45.06	43.06	43.03	40.29	40.49	42.2	39.64	40.66	0.120413	0.0912004
ENSG00000014216	CAPN1	39.2	40.77	37.85	45.68	39.24	38.44	39.22	42.76	40.19	0.260743	0.091208
ENSG00000205476	CCDC85C	23.37	26.67	25.75	26.43	21.97	20.12	21.21	20.91	24.87	0.235908	0.0912108
ENSG00000187446	CHP1	140.83	126.49	129.63	136.35	134.51	137.39	123.02	119.14	127.31	0.228737	0.091224
ENSG00000109436	TBC1D9	6.84	6.85	6.47	6.05	6.22	6.6	5.48	6.06	6.39	0.134471	0.0912294
ENSG00000163220	S100A9	1.59	2.13	1.86	2.11	1.65	2.37	1.92	2.2	2.56	0.317985	0.0913462
ENSG00000196505	GDAP2	7.58	7.49	7.81	6.34	7.33	6.96	6.81	7.37	6.32	0.0703822	0.0914053
ENSG00000080815	PSEN1	38.41	34.12	31.05	37.91	34.03	38.63	40.07	36.15	38.39	0.23439	0.0914885
ENSG00000198517	MAFK	21.24	21.47	28.4	21.11	20	19.16	19.33	19.7	21.06	0.165576	0.0915377
ENSG00000164070	HSPA4L	7.46	9.09	7.86	7.9	8.95	9.13	7.43	8.21	6.63	0.164613	0.091609
ENSG00000105854	PON2	61.93	65.21	68.65	61.13	58.56	62.52	58.56	59.47	50.76	0.0682407	0.0916714
ENSG00000011677	GABRA3	2.31	2.35	3.12	2.21	2.34	2.06	2.62	2.66	3.12	0.182791	0.0917517
ENSG00000055732	MCOLN3	0.37	0.26	0.27	0.37	0.19	0.51	0.37	0.3	0.31	0.303701	0.0917517
ENSG00000179456	ZBTB18	0.42	0.46	0.4	0.45	0.36	0.25	0.25	0.29	0.4	0.152497	0.0917517
ENSG00000133739	LRRCC1	0.4	0.56	0.43	0.41	0.31	0.57	0.4	0.83	0.7	0.399313	0.0917517
ENSG00000111727	HCFC2	2.16	2.18	1.78	1.74	1.71	2.19	2.26	2.78	1.99	0.315722	0.0917764
ENSG00000181619	GPR135	0.31	0.25	0.18	0.46	0.39	0.5	0.39	0.59	0.27	0.0367608	0.0918302
ENSG00000213588	ZBTB9	5.87	5.95	7.2	5.93	7.27	6.58	5.98	6.43	7.33	0.349688	0.0919091
ENSG00000179051	RCC2	108.57	105.24	121.96	111.94	118.71	111.2	121.27	116.49	121.99	0.400085	0.0919881
ENSG00000235750	KIAA0040	0.67	0.55	0.61	0.36	0.53	0.37	0.72	0.59	0.79	0.080837	0.0920314
ENSG00000010803	SCMH1	22.14	22.62	25.14	21.92	21.18	22.46	24.84	23.03	26.14	0.0892714	0.0920426
ENSG00000203772	SPRN	1.02	0.8	0.74	1.03	0.68	0.6	0.66	0.8	0.35	0.109184	0.0920779
ENSG00000079819	EPB41L2	11.76	9.94	11.15	11	11.04	14.19	11.8	11.01	11.84	0.206198	0.0920789
ENSG00000153721	CNKSR3	5.43	5.55	7.1	5.93	5.63	5.07	4.32	5.38	4.94	0.299934	0.0920894
ENSG00000161048	NAPEPLD	0.89	1.27	1.17	1.31	1.16	1.02	0.78	1.27	1.05	0.399449	0.092137
ENSG00000105246	EBI3	0.73	0.85	1.02	0.74	0.98	0.84	1.13	0.86	1.3	0.448048	0.092137
ENSG00000082258	CCNT2	4.31	4.02	4.8	3.85	5.29	4.52	6.19	5.32	4.85	0.389088	0.09216
ENSG00000153140	CETN3	5.23	7.11	7.76	8.69	8.13	7.38	7.27	8.21	7.9	0.173694	0.0922063
ENSG00000151116	UEVLD	7.63	7.12	7.47	7.07	6.55	8.54	7.89	8.78	8.07	0.48703	0.092265
ENSG00000179364	PACS2	10.15	9.44	9.53	10.9	9.7	11.93	10.15	11.29	11.58	0.110587	0.0922875
ENSG00000143353	LYPLAL1	4.93	4.82	5.41	6.8	7.87	5.69	5.46	9.96	7.75	0.0816961	0.0923615
ENSG00000183010	PYCR1	355.26	326.79	333.43	333.58	321.38	294.17	321.4	317.39	325.96	0.0759986	0.092368
ENSG00000176018	LYSMD3	2.78	4.36	4.29	3.44	4.18	4.03	2.75	3.51	3.07	0.413222	0.0923798
ENSG00000153048	CARHSP1	113.89	112.37	103.47	123.65	108.2	107.13	119.68	115.32	120.6	0.262155	0.0923816
XLOC_027914	TCONS_00179824	7.51	6.78	6.09	6.93	5.87	7.29	7.74	7.31	7.56	0.448127	0.0924273
ENSG00000102753	KPNA3	6.05	6.71	7.52	5.99	6.23	7.1	5.99	5.37	5.52	0.0674095	0.0924281
ENSG00000182326	C1S	107.05	94.28	75.41	107.29	115.81	112.29	109.62	111.68	109.12	0.103542	0.0924523
ENSG00000169504	CLIC4	72.04	79.08	76.66	76.03	72.54	77.75	68.58	76.15	63.8	0.445534	0.0924713
ENSG00000090621	PABPC4	63.24	58.62	64.1	63.84	64.26	63.47	63.39	63.22	70.65	0.216217	0.0925169
ENSG00000116396	KCNC4	2.9	2.43	2.72	2.64	2.52	2.25	2.62	1.93	2.69	0.160763	0.0925273
ENSG00000149922	TBX6	0.48	0.72	0.61	1.05	0.64	0.56	0.59	0.88	1.15	0.280154	0.0925273
ENSG00000162068	NTN3	0.23	0.22	0.11	0.41	0.13	0.16	0.44	0.3	0.14	0.305104	0.0925467
ENSG00000197580	BCO2	6.29	3.51	3.28	4.46	4.66	5.73	6.47	6.1	4.66	0.343606	0.092547
ENSG00000152102	FAM168B	68.4	66.06	65.27	65.08	64.32	63.62	59.7	57.15	65.31	0.0270307	0.0927101
ENSG00000136048	DRAM1	23.53	23.66	20.34	26.5	27.2	29.45	25.17	25.67	20.35	0.0585765	0.0927235
ENSG00000198399	ITSN2	3.59	5.14	4.73	4.51	4.7	6.3	5.53	5.6	5.23	0.183899	0.0927288
ENSG00000119640	ACYP1	15.83	18.51	15.17	16.2	14.98	14.93	13	12.68	14.66	0.224101	0.0927841
ENSG00000170791	CHCHD7	6.6	9.13	9.58	8.62	7.98	9.51	9.77	9.7	10.61	0.400691	0.0927929
ENSG00000178726	THBD	0.42	0.22	0.45	0.54	0.27	0.37	0.23	0.21	0.34	0.329794	0.0928096
ENSG00000129993	CBFA2T3	0.33	0.16	0.33	0.12	0.58	0.17	0.26	0.1	0.33	0.470905	0.0929542
ENSG00000196233	LCOR	2.5	2.63	2.83	2.22	2.9	2.91	2.47	2.48	2.51	0.449115	0.0930519
ENSG00000166135	HIF1AN	22.28	21.25	22.25	22.89	20.16	19.37	19.66	20.34	15.52	0.191021	0.0931085
ENSG00000205593	DENND6B	0.84	1.14	1.44	1.73	1.5	0.94	0.78	0.75	1.3	0.299985	0.0932098
ENSG00000007314	SCN4A	0.83	0.77	1.25	0.45	0.26	0.25	0.51	0.63	0.35	0.0396265	0.0933317
ENSG00000104936	DMPK	20.25	22.75	18.44	17.65	18.11	16.61	14.55	14.86	18.32	0.0345118	0.0934235
ENSG00000149380	P4HA3	3.73	3.98	2.33	3.78	4.12	3.55	3.72	5.25	3.66	0.168817	0.0934362
ENSG00000124226	RNF114	58.8	62.09	57.19	68.82	59.77	66.15	59.51	67.21	67.1	0.147424	0.0934756
ENSG00000174939	ASPHD1	40.2	40.66	49.65	38.15	41.41	35.78	36.35	38.63	37.94	0.188107	0.0935389
ENSG00000278662	GOLGA6L10	0.91	0.62	0.42	0.59	0.28	0.33	0.42	0.38	0.38	0.0446762	0.0937001
ENSG00000188486	H2AFX	82.91	87.37	86.48	92.56	97.16	89.07	95.59	92	88.35	0.0453716	0.0937129
ENSG00000135314	KHDC1	1.59	1.58	1.36	2.13	1.84	2.29	2.53	1.61	1.96	0.0486151	0.093733
ENSG00000132182	NUP210	71.85	68.82	68.66	70.78	75.18	72.07	74.49	69.25	74.02	0.155745	0.093757
ENSG00000100614	PPM1A	17.8	14.65	16.34	15.08	14.54	16.08	14	14.61	13.53	0.173809	0.0938263
ENSG00000090013	BLVRB	225.7	211.7	228.3	215.88	217.32	211.18	225.96	232.94	243.79	0.200085	0.0938289
ENSG00000168288	MMADHC	85.63	91.16	84.17	89.33	88.58	89.05	88.1	97.35	84.95	0.239359	0.0938817
ENSG00000205744	DENND1C	2.17	2.4	2.05	3.2	2.92	2.8	2.36	4.2	5.33	0.0175302	0.0939107
ENSG00000126821	SGPP1	9.06	11.83	12.25	11.61	12.15	10.9	7.69	11.64	9.58	0.348851	0.0939122
ENSG00000155066	PROM2	1.78	1.22	1.21	3.56	1.4	1.66	1.81	1.84	2.18	0.122883	0.0939123
ENSG00000170873	MTSS1	14.56	15.91	12.55	15.32	16.26	15.42	17.34	16.28	17.92	0.115677	0.0940216
ENSG00000167588	GPD1	0.56	0.73	0.71	0.47	0.43	0.5	0.31	0.3	0.69	0.0406848	0.0940647
ENSG00000099998	GGT5	2.31	3.88	1.05	2.41	2.68	3.22	3.42	3.89	2.52	0.375537	0.0941077
ENSG00000108010	GLRX3	86.53	86.53	91.74	87.08	85.05	84.65	74.75	86.4	75.94	0.181267	0.0941251
ENSG00000184254	ALDH1A3	19.24	17.49	20.04	26.27	18.28	21.57	18.57	17.17	18.07	0.127082	0.0941258
ENSG00000150457	LATS2	5.96	6.2	7.93	5.74	5.91	5.73	5.58	5.69	6.11	0.149174	0.0942223
ENSG00000153574	RPIA	11.93	11.78	12.33	10.73	11.95	11.21	11.94	10.75	11.17	0.123903	0.0943384
ENSG00000163781	TOPBP1	16.23	15.73	15.46	16.12	14.82	16.11	14.13	15.75	13.57	0.404948	0.0943697
ENSG00000121211	MND1	9.15	12.84	9.6	11.4	10.63	10.47	12.9	13.89	10.38	0.419705	0.0944159
ENSG00000100028	SNRPD3	117.48	112.09	103.25	109.72	98.11	94.2	100.27	106.12	100.56	0.0162252	0.0944291
ENSG00000128487	SPECC1	51.73	52.29	47.66	49.54	45.54	51.95	43.18	42.69	47.75	0.338123	0.0944641
ENSG00000117009	KMO	0.56	0.41	0.17	0.87	0.15	0.26	0.72	1.09	0.34	0.402495	0.0944658
ENSG00000126091	ST3GAL3	5.7	7.74	6.33	7.41	7.37	6.25	7.27	7.72	8.02	0.29232	0.0945461
XLOC_019783	TCONS_00130024	0.66	0.37	0.38	0.42	0.15	0.4	0.45	0.36	0.26	0.110604	0.094548
ENSG00000213593	TMX2	93.55	80.82	81.04	74.01	75.73	73.53	83.14	78.25	78.57	0.0693344	0.0946664
ENSG00000153933	DGKE	1.99	2.68	2.26	1.78	1.57	2.07	1.93	2.16	1.28	0.119487	0.0946725
ENSG00000172331	BPGM	6.9	7	6.74	6.88	5.1	6.58	5.02	5.44	6.75	0.185109	0.0946917
ENSG00000163513	TGFBR2	9.32	9.97	10.08	10.86	9.53	10.35	8.64	9.77	8.4	0.256508	0.0947094
ENSG00000143515	ATP8B2	0.29	0.36	0.22	0.34	0.6	0.26	0.52	0.54	0.22	0.116486	0.094754
ENSG00000162971	TYW5	3.13	3.05	3.26	2.69	3	3.41	2.8	2.9	2.3	0.290075	0.0949043
ENSG00000079150	FKBP7	8.04	6.07	8.4	8.37	6.97	6.53	6.3	6.07	7.05	0.412081	0.094965
ENSG00000164054	SHISA5	164.75	144.6	124.24	159.46	175.53	164.61	168.19	178.51	186.59	0.127322	0.0949661
ENSG00000179477	ALOX12B	0.43	0.38	0.43	0.34	0.11	0.21	0.12	0.38	0.19	0.034553	0.0950185
ENSG00000130340	SNX9	20.43	19.88	23.28	18.92	20.45	19.75	19.31	17.83	16.84	0.167555	0.0950465
ENSG00000258890	CEP95	9.15	9.52	8.29	8.19	8.78	7.7	9.17	7.34	6.43	0.00962136	0.095051
ENSG00000142583	SLC2A5	2.24	1.73	1.79	2.95	2.51	2.83	1.14	1.46	1.53	0.00693782	0.0950982
ENSG00000116918	TSNAX	21.66	20.63	20.71	17.6	21.46	24.72	19.2	20.57	17.08	0.460953	0.0951714
ENSG00000117479	SLC19A2	7.96	8.6	9.97	8.74	7.92	7.81	7.47	7.85	7.42	0.251711	0.0952047
ENSG00000137133	HINT2	100.36	105.51	87.31	112.11	115.29	99.28	109.16	112.45	119.93	0.00193247	0.0952538
ENSG00000020633	RUNX3	1.31	1.13	1.57	1.46	1.14	2.32	1.31	0.9	1.27	0.156572	0.0952665
ENSG00000137770	CTDSPL2	17.58	21.76	19.41	17.8	16.4	19.88	17.69	14.38	12.6	0.249657	0.0952671
ENSG00000171798	KNDC1	2.14	0.8	1.31	1.16	0.61	0.67	0.99	0.75	0.65	0.0593641	0.0953384
ENSG00000134986	NREP	3.74	2.54	2.34	4.2	4.01	2.82	4.12	2.9	3.88	0.0687812	0.0953476
ENSG00000136783	NIPSNAP3A	16.66	19.89	12.84	20.5	17.62	18.71	17.77	20.06	15.11	0.208686	0.0953527
ENSG00000137962	ARHGAP29	8.79	10.83	7.84	9.8	10.68	11.93	9.63	10.85	8.38	0.161029	0.095369
ENSG00000070614	NDST1	26.92	25.85	22.66	22.93	22.57	22.3	19.99	23.09	21.83	0.0745967	0.0953777
ENSG00000196776	CD47	28.6	28.61	29.76	31.17	33.35	35.04	29.88	34.53	31.33	0.0184018	0.0953824
ENSG00000197321	SVIL	7.33	8.22	7.43	7.42	8.45	8.59	6.99	7.53	7.38	0.139765	0.0955482
ENSG00000163104	SMARCAD1	3.4	4.16	3.21	3.6	4.66	4.72	4.59	4.45	3.49	0.102052	0.0956234
ENSG00000115271	GCA	2.94	2.56	1.87	3.62	4.83	4.02	3	3.86	2.6	0.0398746	0.0956622
ENSG00000162836	ACP6	18.75	14.58	11.38	18	16.36	17.93	18.73	20.06	18.48	0.179572	0.0957399
ENSG00000011422	PLAUR	42.28	36.15	47.21	45.78	42.61	46.33	48.15	44.68	47.31	0.145775	0.0957745
XLOC_013309	TCONS_00085906	0.88	0.57	0.42	0.68	0.58	0.67	0.72	0.45	0.42	0.445926	0.0958548
ENSG00000168301	KCTD6	5.04	5.46	4.29	4.83	5.01	5.09	4.46	4.93	4.3	0.457079	0.0958722
ENSG00000085831	TTC39A	0.77	1.16	1.81	1.4	1.51	0.99	0.42	1.06	0.94	0.457691	0.0959503
ENSG00000128641	MYO1B	16.48	15.11	14.79	14.91	16.34	16.94	14.93	14.96	11.92	0.321831	0.095975
ENSG00000109320	NFKB1	12.19	13.97	9.87	13.01	13.33	13.84	13.56	14.27	13	0.20809	0.0960042
ENSG00000185379	RAD51D	17.02	16.3	13.44	16.56	17.08	15.13	17.49	18.74	18.81	0.19737	0.0960432
ENSG00000188612	SUMO2	95.56	99.18	104.27	98.84	90.5	96.94	87.94	98.22	89.27	0.189231	0.0960713
ENSG00000185219	ZNF445	2.11	2.69	2.48	2.15	2.54	2.52	2.05	2.34	2.37	0.373951	0.0962071
ENSG00000130487	KLHDC7B	4.16	2.54	3.65	3.19	5.35	4.23	4.2	4.89	5.19	0.269347	0.0962555
ENSG00000139842	CUL4A	68.68	60.43	65.83	61.39	60.39	62.02	60.27	60.19	52.86	0.109049	0.0962987
ENSG00000185105	MYADML2	0.17	0.28	0.11	0.28	0.29	0.13	0.19	0.41	0.38	0.139959	0.0963031
ENSG00000066739	ATG2B	2.53	2.72	3.34	2.52	2.67	3.42	2.3	2.47	2.33	0.439142	0.0963527
ENSG00000258839	MC1R	5.87	5.32	5.64	6.4	4.33	5.16	5.78	4.86	5.51	0.277802	0.0964374
ENSG00000183386	FHL3	14.49	14.96	12.1	16.73	16.64	16.95	18.41	15.26	19.09	0.0479321	0.0964905
ENSG00000135211	TMEM60	11.28	13.31	10.96	12.64	13.3	12.36	10.74	12.31	10.91	0.0932789	0.0965195
ENSG00000149639	SOGA1	6.19	5.39	6.75	5.98	5.81	6.13	6.68	5.95	6.74	0.347822	0.0965718
ENSG00000149926	FAM57B	0.94	0.47	1.02	0.28	0.62	0.76	0.48	0.46	0.73	0.193429	0.0966112
ENSG00000107864	CPEB3	1.37	1.68	2.12	1.85	2.07	2.18	1.79	2.1	2.11	0.0679416	0.096669
ENSG00000186063	AIDA	18.96	17.04	18.27	19.13	21.04	21.79	20.85	23.69	19.55	0.0835824	0.0968076
ENSG00000112335	SNX3	48.44	50.41	41.03	50.81	46.13	46.65	46.48	47.44	40.99	0.356266	0.0968389
ENSG00000111231	GPN3	19.43	23	21.71	23.07	20.6	20.92	19.29	20.66	17.68	0.470683	0.0969123
ENSG00000108179	PPIF	81.34	77.46	83.06	120.13	117.01	103.85	114.4	104.55	82.59	0.0163705	0.0969465
ENSG00000134352	IL6ST	10.82	12.64	12.42	12.55	17.83	17.91	17.92	18.74	12.29	0.0377727	0.0969662
ENSG00000142910	TINAGL1	32.57	36.4	43.37	31.68	30.72	32.84	32.19	29.49	31.61	0.0885456	0.0969805
ENSG00000145979	TBC1D7	20.8	19.17	16.14	26.07	21.63	25.16	21.02	23.77	23.81	0.0494672	0.0969809
ENSG00000074219	TEAD2	36.37	34.27	27.62	37.05	33.35	36.09	38.84	37.18	39.01	0.222029	0.0969976
ENSG00000187775	DNAH17	0.71	0.99	0.75	0.87	0.85	0.92	0.91	1.09	1.37	0.29851	0.0970489
ENSG00000144354	CDCA7	24.9	23.35	24.94	27.31	22.65	22.79	23.59	23.37	23.86	0.461564	0.0970576
ENSG00000160469	BRSK1	0.57	0.83	0.72	0.26	0.28	0.34	0.55	0.63	0.34	0.0142295	0.0970885
ENSG00000071967	CYBRD1	31.49	31.22	28.29	30.81	28.25	31.5	25.39	31.38	21.87	0.471301	0.0971663
ENSG00000162419	GMEB1	4.22	5.01	4.18	5.19	4.93	4.63	3.93	4	3.99	0.139253	0.0972031
XLOC_017412	TCONS_00114919	3.01	2.77	3.31	3.14	3.15	3.52	3.77	3.58	3.29	0.041392	0.0972219
ENSG00000140694	PARN	32.13	33.35	29.38	31.75	31.72	31.43	32.03	30.15	27.5	0.495637	0.097241
ENSG00000157625	TAB3	7.54	9.94	8.94	9.34	7.93	11.12	7.44	8.95	7.05	0.336055	0.0972473
ENSG00000110367	DDX6	20.59	22.38	20.48	20.89	19.22	19.62	19.71	21.7	17.17	0.173461	0.0973897
ENSG00000125846	ZNF133	7.18	7.59	8.85	8.4	6.49	6.94	8.78	10.09	8.89	0.294886	0.0973921
ENSG00000168411	RFWD3	46.91	42.14	49.34	43.56	41.29	41.22	43.09	42.22	46.03	0.0969965	0.0974115
ENSG00000157823	AP3S2	51.18	52.67	59.79	50.46	54.32	54.48	46.55	52.03	50.27	0.274491	0.0974259
ENSG00000220205	VAMP2	20.93	20.54	24.8	20.2	20.51	19.48	20.84	19.2	22.42	0.173153	0.0975339
ENSG00000140464	PML	41.73	42.21	15.7	49.95	50.52	52.15	54.5	50.99	61.37	0.100452	0.0976431
ENSG00000136492	BRIP1	2.35	3.17	2.72	2.84	3.72	3.83	3.8	4.25	2.71	0.0341079	0.0976514
ENSG00000134247	PTGFRN	15.71	17.64	14.38	18.56	17.31	17.35	17.77	18.14	19.36	0.116213	0.0978469
ENSG00000167842	MIS12	18.33	16.12	15.52	15.34	17.56	16.2	20.85	19.27	15.47	0.425864	0.0978576
ENSG00000139631	CSAD	7.43	6.28	8.47	6.21	5.34	7.16	7.25	5.48	6.58	0.0045748	0.0978593
ENSG00000164574	GALNT10	10.24	8.77	9.16	9.62	10.47	9.7	10.32	6.01	6.48	0.252353	0.0978858
ENSG00000114107	CEP70	7.11	9.48	9.3	7.66	8.29	8.36	7.13	7.34	6.39	0.217254	0.0980207
ENSG00000132024	CC2D1A	21.38	21.96	22.21	23.74	22.21	20.23	21.48	24.26	26.09	0.441157	0.0981723
ENSG00000176155	CCDC57	38.29	37.53	39.5	36.64	41.4	32.88	40.36	38.1	39.9	0.338065	0.0981788
ENSG00000111961	SASH1	3.08	3.47	2.43	2.54	2.79	3.38	2.58	2.75	2.43	0.439441	0.0982318
ENSG00000141568	FOXK2	32.89	27.78	34.05	30.45	28.55	26.16	31.44	25.37	25.86	0.167281	0.0982977
ENSG00000152404	CWF19L2	1.92	2.49	1.5	1.59	2.74	2.62	2.97	2.48	2.28	0.248572	0.0983426
ENSG00000056736	IL17RB	3.85	3.68	3.67	4.22	3.82	4.25	3.61	3.46	2.68	0.0518159	0.0983549
ENSG00000149243	KLHL35	9.17	7.52	6.19	10.95	9.73	8.04	9.09	10.2	8.7	0.00232494	0.0983553
ENSG00000116459	ATP5F1	177.53	192.87	163.68	179.22	180.12	183.51	177.2	182.37	157.69	0.392888	0.0984832
ENSG00000168096	ANKS3	17.78	17.6	14.57	19.41	14.31	15.11	19.89	17.79	18.59	0.41288	0.0985041
ENSG00000166450	PRTG	1.79	2.54	2.08	2.16	2.41	2.07	1.56	2.5	1.57	0.330754	0.0985563
ENSG00000162298	SYVN1	22.96	22.07	24.82	21.87	22.13	21.66	22.94	19.48	23.13	0.138211	0.0986304
ENSG00000167880	EVPL	4.21	4.79	4.37	4.95	4.1	4.47	5.13	4.76	5.38	0.45741	0.0986306
ENSG00000112290	WASF1	15.27	17.38	14.49	16.43	16.43	16.22	13.95	14.28	14.21	0.255373	0.0987002
ENSG00000124155	PIGT	94.31	87.99	104	82.88	87.7	81.6	86.21	87.88	91.44	0.108356	0.0988305
ENSG00000101350	KIF3B	8.33	7.69	9.03	8.32	8.47	9.32	7.98	7.31	7.45	0.132317	0.0988495
ENSG00000048707	VPS13D	4.21	5.86	4.92	4.88	4.96	6.8	4.58	7.12	5.14	0.282442	0.0989126
ENSG00000156411	C14orf2	105.72	110.76	94.04	100.97	91.91	89.23	97.03	87.07	91.13	0.0904594	0.0989359
ENSG00000167637	ZNF283	2.01	2.56	3.47	1.95	1.45	2.79	1.96	1.67	1.89	0.090174	0.0989985
ENSG00000184277	TM2D3	23.56	23.97	24.78	23.04	23.69	22.4	23.39	22.47	21.76	0.125645	0.0990011
ENSG00000196235	SUPT5H	50.28	54.57	46.18	59.71	55.47	53.77	60.27	54.31	58.71	0.0738302	0.0990603
ENSG00000132640	BTBD3	53.79	52.75	64.78	48.54	48.97	50.18	48.19	47.26	40.68	0.0728369	0.0991736
ENSG00000119397	CNTRL	0.7	1.38	1.61	0.98	1.61	1.63	2.29	2.19	1.69	0.078408	0.0992026
ENSG00000196655	TRAPPC4	61.96	64.2	76.01	57.12	62.87	60.29	54.66	62.26	57.52	0.117069	0.0992174
ENSG00000225697	SLC26A6	15.03	13.6	15.88	15.33	13.4	15.37	17.18	13.63	17.21	0.310502	0.0992367
ENSG00000198948	MFAP3L	4.05	2.93	3.89	3.15	2.25	2.58	2.31	2.99	2.27	0.0174075	0.0994249
ENSG00000136842	TMOD1	4.83	4.74	4.78	6.52	3.94	4.41	4.15	3.35	4.7	0.421245	0.0994463
ENSG00000153147	SMARCA5	9.89	12.08	8.72	10.62	12.66	14.03	13.21	12.24	10.42	0.14553	0.0994664
ENSG00000187713	TMEM203	36.03	36.2	29.36	39.69	40.3	34.96	37.84	37.8	36.79	0.00847368	0.0994767
ENSG00000174405	LIG4	2.42	2.22	3.11	1.69	2.42	2.67	2.34	2.05	2.58	0.180166	0.0995733
ENSG00000166260	COX11	19.13	19.99	19.98	18.56	16.81	20.76	17.95	19.4	16.21	0.24203	0.0996014
ENSG00000155016	CYP2U1	0.39	0.54	0.43	0.33	0.38	0.43	0.35	0.53	0.33	0.128344	0.0996796
ENSG00000160710	ADAR	228.76	178.22	142.31	207.53	222.76	226.16	228.37	239.24	231.26	0.182039	0.0996989
ENSG00000152910	CNTNAP4	3.4	3.53	4.42	2.76	4.05	3.37	3.41	2.9	3.95	0.247023	0.0997081
[truncated: 9,874 more rows]

## Sheet: C vs 100 dif
id	GC_fpkm	G100_fpkm	log2(FC)	Pvalue	FDR	significant	Symbol	Description	KEGG_A_class	KEGG_B_class	Pathway	K_ID	GO Component	GO Function	GO Process
ENSG00000250151	4.00667	2.10333	-0.929725	0.000860436	0.293749	yes	ARPC4-TTLL3	ARPC4-TTLL3 readthrough [Source:HGNC Symbol;Acc:HGNC:38830]	-	-	-	-	GO:0005575//cellular_component;GO:0005623//cell;GO:0005622//intracellular;GO:0043234//protein complex;GO:0044464//cell part;GO:0005856//cytoskeleton;GO:0043228//non-membrane-bounded organelle;GO:0043229//intracellular organelle;GO:0032991//macromolecular complex;GO:0043232//intracellular non-membrane-bounded organelle;GO:0043226//organelle;GO:0044424//intracellular part	-	GO:0071822//protein complex subunit organization;GO:0044085//cellular component biogenesis;GO:0007010//cytoskeleton organization;GO:0044237//cellular metabolic process;GO:0043933//macromolecular complex subunit organization;GO:0008150//biological_process;GO:0043412//macromolecule modification;GO:0008152//metabolic process;GO:0071840//cellular component organization or biogenesis;GO:0070271//prote…
ENSG00000168062	1.8	3.20667	0.833077	0.000310322	0.153511	yes	BATF2	basic leucine zipper ATF-like transcription factor 2 [Source:HGNC Symbol;Acc:HGNC:25163]	-	-	-	-	GO:0043226//organelle;GO:0005575//cellular_component;GO:0043227//membrane-bounded organelle;GO:0005623//cell;GO:0044464//cell part;GO:0043231//intracellular membrane-bounded organelle;GO:0043229//intracellular organelle;GO:0044424//intracellular part;GO:0005634//nucleus;GO:0005622//intracellular	GO:0003676//nucleic acid binding;GO:0097159//organic cyclic compound binding;GO:0003674//molecular_function;GO:0005488//binding;GO:0001071//nucleic acid binding transcription factor activity;GO:0003677//DNA binding;GO:1901363//heterocyclic compound binding	GO:0008152//metabolic process;GO:0050896//response to stimulus;GO:0044699//single-organism process;GO:0034641//cellular nitrogen compound metabolic process;GO:0044237//cellular metabolic process;GO:0044767//single-organism developmental process;GO:0009987//cellular process;GO:0006950//response to stress;GO:0009058//biosynthetic process;GO:0002376//immune system process;GO:0032502//developmental p…
ENSG00000117475	10.4167	16.28	0.644207	0.000143414	0.0969574	yes	BLZF1	basic leucine zipper nuclear factor 1 [Source:HGNC Symbol;Acc:HGNC:1065]	-	-	-	-	GO:0043226//organelle;GO:0005654//nucleoplasm;GO:0044444//cytoplasmic part;GO:0070013//intracellular organelle lumen;GO:0043227//membrane-bounded organelle;GO:0005794//Golgi apparatus;GO:0043229//intracellular organelle;GO:0043233//organelle lumen;GO:0005575//cellular_component;GO:0031974//membrane-enclosed lumen;GO:0005622//intracellular;GO:0005623//cell;GO:0012505//endomembrane system;GO:000563…	GO:0005488//binding;GO:0003677//DNA binding;GO:0005515//protein binding;GO:0001071//nucleic acid binding transcription factor activity;GO:0003676//nucleic acid binding;GO:0097159//organic cyclic compound binding;GO:0019899//enzyme binding;GO:1901363//heterocyclic compound binding;GO:0003674//molecular_function	GO:0006807//nitrogen compound metabolic process;GO:0016192//vesicle-mediated transport;GO:0007009//plasma membrane organization;GO:0008150//biological_process;GO:0071840//cellular component organization or biogenesis;GO:0008283//cell proliferation;GO:0061024//membrane organization;GO:0010256//endomembrane system organization;GO:0051179//localization;GO:0034641//cellular nitrogen compound metaboli…
ENSG00000258643	15.8333	10.3867	-0.608232	0.000362641	0.173152	yes	BCL2L2-PABPN1	BCL2L2-PABPN1 readthrough [Source:HGNC Symbol;Acc:HGNC:42959]	Genetic Information Processing;Human Diseases	Infectious diseases;Translation	ko05164//Influenza A;ko03015//mRNA surveillance pathway	K14396	GO:0005576//extracellular region;GO:0005575//cellular_component;GO:0043227//membrane-bounded organelle;GO:0005739//mitochondrion;GO:0005622//intracellular;GO:0043229//intracellular organelle;GO:0005737//cytoplasm;GO:0044464//cell part;GO:0044424//intracellular part;GO:0043231//intracellular membrane-bounded organelle;GO:0005623//cell;GO:0043226//organelle;GO:0044444//cytoplasmic part	GO:0003674//molecular_function	GO:0065007//biological regulation;GO:0023052//signaling;GO:0044763//single-organism cellular process;GO:0007165//signal transduction;GO:0050896//response to stimulus;GO:0000003//reproduction;GO:0006950//response to stress;GO:0008219//cell death;GO:0050794//regulation of cellular process;GO:0007154//cell communication;GO:0009987//cellular process;GO:0044700//single organism signaling;GO:0050789//r…
ENSG00000182179	3.62333	6.72667	0.993632	0.000855549	0.396773	yes	UBA7	ubiquitin like modifier activating enzyme 7 [Source:HGNC Symbol;Acc:HGNC:12471]	Human Diseases;Genetic Information Processing	Neurodegenerative diseases;Folding, sorting and degradation	ko04120//Ubiquitin mediated proteolysis;ko05012//Parkinson's disease	K10698	GO:0044446//intracellular organelle part;GO:0005634//nucleus;GO:0005654//nucleoplasm;GO:0031974//membrane-enclosed lumen;GO:0031981//nuclear lumen;GO:0044428//nuclear part;GO:0044464//cell part;GO:0043227//membrane-bounded organelle;GO:0005622//intracellular;GO:0005737//cytoplasm;GO:0044422//organelle part;GO:0043233//organelle lumen;GO:0043226//organelle;GO:0005575//cellular_component;GO:0043229…	GO:0016874//ligase activity;GO:0003674//molecular_function;GO:0003824//catalytic activity	GO:0046483//heterocycle metabolic process;GO:0043412//macromolecule modification;GO:0006139//nucleobase-containing compound metabolic process;GO:0006807//nitrogen compound metabolic process;GO:0008150//biological_process;GO:0071704//organic substance metabolic process;GO:0034641//cellular nitrogen compound metabolic process;GO:0006464//cellular protein modification process;GO:0044267//cellular pr…
ENSG00000174808	0.463333	0.916667	0.984347	0.000254473	0.135822	yes	BTC	betacellulin [Source:HGNC Symbol;Acc:HGNC:1121]	Environmental Information Processing	Signal transduction	ko04012//ErbB signaling pathway	K09783	GO:0005622//intracellular;GO:0044464//cell part;GO:0005576//extracellular region;GO:0016020//membrane;GO:0044421//extracellular region part;GO:0071944//cell periphery;GO:0005886//plasma membrane;GO:0005575//cellular_component;GO:0005615//extracellular space;GO:0005623//cell	GO:0003674//molecular_function;GO:0003824//catalytic activity;GO:0016772//transferase activity, transferring phosphorus-containing groups;GO:0016740//transferase activity;GO:0016301//kinase activity	GO:0044237//cellular metabolic process;GO:0016265//death;GO:0008219//cell death;GO:0044767//single-organism developmental process;GO:0007049//cell cycle;GO:0006996//organelle organization;GO:0030154//cell differentiation;GO:0040011//locomotion;GO:0048870//cell motility;GO:0007154//cell communication;GO:0007165//signal transduction;GO:0071840//cellular component organization or biogenesis;GO:00447…
ENSG00000152705	0.08	0.45	2.49185	0.000604577	0.250245	yes	CATSPER3	cation channel sperm associated 3 [Source:HGNC Symbol;Acc:HGNC:20819]	-	-	-	-	GO:0016023//cytoplasmic, membrane-bounded vesicle;GO:0012505//endomembrane system;GO:0042995//cell projection;GO:0031410//cytoplasmic vesicle;GO:0032991//macromolecular complex;GO:0043234//protein complex;GO:0005783//endoplasmic reticulum;GO:0005575//cellular_component;GO:0044464//cell part;GO:0005623//cell;GO:0043227//membrane-bounded organelle;GO:0005622//intracellular;GO:0044424//intracellular…	GO:0005215//transporter activity;GO:0022857//transmembrane transporter activity;GO:0003674//molecular_function	GO:1902578//single-organism localization;GO:0040011//locomotion;GO:0006928//movement of cell or subcellular component;GO:0008150//biological_process;GO:0006810//transport;GO:0044699//single-organism process;GO:0048856//anatomical structure development;GO:0048870//cell motility;GO:0044767//single-organism developmental process;GO:0021700//developmental maturation;GO:0032502//developmental process;…
ENSG00000179862	78.8167	139.167	0.820241	4.50834e-09	1.30626e-05	yes	CITED4	Cbp/p300 interacting transactivator with Glu/Asp rich carboxy-terminal domain 4 [Source:HGNC Symbol;Acc:HGNC:18696]	-	-	-	-	GO:0043231//intracellular membrane-bounded organelle;GO:0005575//cellular_component;GO:0005622//intracellular;GO:0043226//organelle;GO:0044424//intracellular part;GO:0043227//membrane-bounded organelle;GO:0005737//cytoplasm;GO:0043229//intracellular organelle;GO:0005623//cell;GO:0005634//nucleus;GO:0044464//cell part	GO:0000988//transcription factor activity, protein binding;GO:0003674//molecular_function	GO:0006807//nitrogen compound metabolic process;GO:0009987//cellular process;GO:0008152//metabolic process;GO:0034641//cellular nitrogen compound metabolic process;GO:0009058//biosynthetic process;GO:0008150//biological_process;GO:0044237//cellular metabolic process
ENSG00000224877	43.6733	71.9233	0.719707	1.8451e-06	0.00311853	yes	C17orf89	chromosome 17 open reading frame 89 [Source:HGNC Symbol;Acc:HGNC:33551]	-	-	-	-	GO:0044444//cytoplasmic part;GO:0043227//membrane-bounded organelle;GO:0005739//mitochondrion;GO:0043229//intracellular organelle;GO:0044424//intracellular part;GO:0005622//intracellular;GO:0005623//cell;GO:0043226//organelle;GO:0043231//intracellular membrane-bounded organelle;GO:0044464//cell part;GO:0005737//cytoplasm;GO:0005575//cellular_component	-	-
ENSG00000243449	16.0333	56.9	1.82735	3.16201e-20	2.13773e-16	yes	C4orf48	chromosome 4 open reading frame 48 [Source:HGNC Symbol;Acc:HGNC:34437]	-	-	-	-	GO:0005576//extracellular region;GO:0005575//cellular_component	-	-
ENSG00000283241	0.02	0.15	2.90689	0.0003671	0.173152	yes	AC026348.1	Cilia- and flagella-associated protein 44 [Source:UniProtKB/Swiss-Prot;Acc:Q96MT7]	-	-	-	-	GO:0005575//cellular_component;GO:0005623//cell	-	-
ENSG00000138061	1.2	1.83667	0.614055	0.000378362	0.174408	yes	CYP1B1	cytochrome P450 family 1 subfamily B member 1 [Source:HGNC Symbol;Acc:HGNC:2597]	Organismal Systems;Metabolism;Human Diseases	Cancers;Endocrine system;Amino acid metabolism;Xenobiotics biodegradation and metabolism;Lipid metabolism	ko05206//MicroRNAs in cancer;ko05204//Chemical carcinogenesis;ko00980//Metabolism of xenobiotics by cytochrome P450;ko00140//Steroid hormone biosynthesis;ko04913//Ovarian Steroidogenesis;ko00380//Tryptophan metabolism	K07410	GO:0005622//intracellular;GO:0005623//cell;GO:0043231//intracellular membrane-bounded organelle;GO:0005737//cytoplasm;GO:0044444//cytoplasmic part;GO:0044424//intracellular part;GO:0043226//organelle;GO:0043229//intracellular organelle;GO:0043227//membrane-bounded organelle;GO:0005575//cellular_component;GO:0012505//endomembrane system;GO:0005739//mitochondrion;GO:0044464//cell part;GO:0005783//e…	GO:0003674//molecular_function;GO:0043167//ion binding;GO:0016491//oxidoreductase activity;GO:0005488//binding;GO:0003824//catalytic activity	GO:0044699//single-organism process;GO:0003008//system process;GO:0065007//biological regulation;GO:0044238//primary metabolic process;GO:0051674//localization of cell;GO:0008150//biological_process;GO:0006928//movement of cell or subcellular component;GO:0032502//developmental process;GO:0032501//multicellular organismal process;GO:0008152//metabolic process;GO:0071840//cellular component organi…
ENSG00000137628	8.11333	15.0667	0.892994	3.61626e-06	0.00564193	yes	DDX60	DEXD/H-box helicase 60 [Source:HGNC Symbol;Acc:HGNC:25942]	-	-	-	-	GO:0005622//intracellular;GO:0043232//intracellular non-membrane-bounded organelle;GO:0005575//cellular_component;GO:0005856//cytoskeleton;GO:0044424//intracellular part;GO:0005623//cell;GO:0005737//cytoplasm;GO:0043228//non-membrane-bounded organelle;GO:0043226//organelle;GO:0044464//cell part;GO:0043229//intracellular organelle	GO:0016817//hydrolase activity, acting on acid anhydrides;GO:0003676//nucleic acid binding;GO:0003677//DNA binding;GO:0016462//pyrophosphatase activity;GO:1901363//heterocyclic compound binding;GO:0097159//organic cyclic compound binding;GO:0016787//hydrolase activity;GO:0003674//molecular_function;GO:0003824//catalytic activity;GO:0017111//nucleoside-triphosphatase activity;GO:0005488//binding;G…	GO:0051716//cellular response to stimulus;GO:0044700//single organism signaling;GO:0009987//cellular process;GO:0051704//multi-organism process;GO:0002376//immune system process;GO:0007165//signal transduction;GO:0006950//response to stress;GO:0023052//signaling;GO:0007154//cell communication;GO:0044419//interspecies interaction between organisms;GO:0050896//response to stimulus;GO:0050794//regul…
ENSG00000103254	13.3533	22.3933	0.745869	0.000109587	0.0793798	yes	FAM173A	family with sequence similarity 173 member A [Source:HGNC Symbol;Acc:HGNC:14152]	-	-	-	-	GO:0005575//cellular_component	-	-
ENSG00000182179	4.29667	10.2667	1.74151	0.000819137	0.4186	yes	UBE2L6	ubiquitin conjugating enzyme E2 L6 [Source:HGNC Symbol;Acc:HGNC:12490]	Genetic Information Processing;Human Diseases	Neurodegenerative diseases;Folding, sorting and degradation	ko04120//Ubiquitin mediated proteolysis;ko05012//Parkinson's disease	K04553	GO:0005575//cellular_component;GO:0043229//intracellular organelle;GO:0044464//cell part;GO:0005829//cytosol;GO:0044446//intracellular organelle part;GO:0043233//organelle lumen;GO:0005622//intracellular;GO:0043226//organelle;GO:0043231//intracellular membrane-bounded organelle;GO:0044428//nuclear part;GO:0070013//intracellular organelle lumen;GO:0044424//intracellular part;GO:0005634//nucleus;GO…	GO:0005488//binding;GO:0005515//protein binding;GO:0003674//molecular_function;GO:0032182//ubiquitin-like protein binding	GO:0071704//organic substance metabolic process;GO:0009058//biosynthetic process;GO:0036211//protein modification process;GO:0006950//response to stress;GO:0008152//metabolic process;GO:0006725//cellular aromatic compound metabolic process;GO:0019538//protein metabolic process;GO:0009987//cellular process;GO:1901360//organic cyclic compound metabolic process;GO:0044267//cellular protein metabolic…
ENSG00000168961	8.15333	16.9533	1.05611	0.000410913	0.181248	yes	LGALS9	galectin 9 [Source:HGNC Symbol;Acc:HGNC:6570]	-	-	-	-	GO:0005622//intracellular;GO:0005623//cell;GO:0043229//intracellular organelle;GO:0044421//extracellular region part;GO:0043227//membrane-bounded organelle;GO:0005575//cellular_component;GO:0044464//cell part;GO:0005737//cytoplasm;GO:0005615//extracellular space;GO:0043226//organelle;GO:0043231//intracellular membrane-bounded organelle;GO:0005576//extracellular region;GO:0005634//nucleus;GO:00444…	GO:0019899//enzyme binding;GO:0005515//protein binding;GO:0005488//binding;GO:0003674//molecular_function;GO:0004871//signal transducer activity	GO:0008283//cell proliferation;GO:0006605//protein targeting;GO:0007155//cell adhesion;GO:0051674//localization of cell;GO:0065007//biological regulation;GO:0051704//multi-organism process;GO:0051234//establishment of localization;GO:0048856//anatomical structure development;GO:0006950//response to stress;GO:0044700//single organism signaling;GO:0044763//single-organism cellular process;GO:001626…
ENSG00000174428	8.44	17.5367	1.05506	0.0001932	0.121774	yes	GTF2IRD2B	GTF2I repeat domain containing 2B [Source:HGNC Symbol;Acc:HGNC:33125]	-	-	-	-	GO:0005634//nucleus;GO:0043226//organelle;GO:0043227//membrane-bounded organelle;GO:0031981//nuclear lumen;GO:0044422//organelle part;GO:0044446//intracellular organelle part;GO:0031974//membrane-enclosed lumen;GO:0005622//intracellular;GO:0005737//cytoplasm;GO:0005654//nucleoplasm;GO:0043231//intracellular membrane-bounded organelle;GO:0005623//cell;GO:0044464//cell part;GO:0070013//intracellula…	GO:1901363//heterocyclic compound binding;GO:0003674//molecular_function;GO:0003676//nucleic acid binding;GO:0097159//organic cyclic compound binding;GO:0005488//binding;GO:0001071//nucleic acid binding transcription factor activity;GO:0003677//DNA binding	GO:0034641//cellular nitrogen compound metabolic process;GO:0008152//metabolic process;GO:0032502//developmental process;GO:0044237//cellular metabolic process;GO:0008150//biological_process;GO:0009058//biosynthetic process;GO:0006807//nitrogen compound metabolic process;GO:0048856//anatomical structure development;GO:0009987//cellular process
XLOC_028200	0.253333	0.0233333	-3.44057	0.000226931	0.128591	yes	TCONS_00181788	hCG2039110, partial [Homo sapiens]	-	-	-	-	GO:0005795//Golgi stack;GO:0031982//vesicle;GO:0044431//Golgi apparatus part;GO:0043226//organelle;GO:0044422//organelle part;GO:0098588//bounding membrane of organelle;GO:0031985//Golgi cisterna;GO:0098791//Golgi subcompartment;GO:0043229//intracellular organelle;GO:0031090//organelle membrane;GO:0031988//membrane-bounded vesicle;GO:0016020//membrane;GO:0000323//lytic vacuole;GO:0005773//vacuole…	GO:0005488//binding	GO:0010559//regulation of glycoprotein biosynthetic process;GO:0010675//regulation of cellular carbohydrate metabolic process;GO:2000113//negative regulation of cellular macromolecule biosynthetic process;GO:0060255//regulation of macromolecule metabolic process;GO:1903019//negative regulation of glycoprotein metabolic process;GO:0032269//negative regulation of cellular protein metabolic process;…
ENSG00000274049	0.556667	0.001	-9.12067	3.38797e-05	0.0361657	yes	INO80B-WBP1	INO80B-WBP1 readthrough (NMD candidate) [Source:HGNC Symbol;Acc:HGNC:49199]	-	-	-	-	GO:0031981//nuclear lumen;GO:0044428//nuclear part;GO:0043232//intracellular non-membrane-bounded organelle;GO:0032991//macromolecular complex;GO:0005694//chromosome;GO:0070013//intracellular organelle lumen;GO:0005634//nucleus;GO:0043227//membrane-bounded organelle;GO:0043231//intracellular membrane-bounded organelle;GO:0043226//organelle;GO:0044446//intracellular organelle part;GO:0043234//prot…	-	GO:0009058//biosynthetic process;GO:0016043//cellular component organization;GO:0008150//biological_process;GO:0009987//cellular process;GO:0008152//metabolic process;GO:0006807//nitrogen compound metabolic process;GO:0051276//chromosome organization;GO:0034641//cellular nitrogen compound metabolic process;GO:0071840//cellular component organization or biogenesis;GO:0044237//cellular metabolic pr…
ENSG00000137959	11.4933	18.17	0.660761	0.000455131	0.196404	yes	IFI44L	interferon induced protein 44 like [Source:HGNC Symbol;Acc:HGNC:17817]	-	-	-	-	GO:0043233//organelle lumen;GO:0043231//intracellular membrane-bounded organelle;GO:0005622//intracellular;GO:0005575//cellular_component;GO:0005654//nucleoplasm;GO:0043227//membrane-bounded organelle;GO:0044422//organelle part;GO:0031974//membrane-enclosed lumen;GO:0043226//organelle;GO:0044424//intracellular part;GO:0044464//cell part;GO:0043229//intracellular organelle;GO:0044446//intracellula…	GO:0003674//molecular_function	GO:0006950//response to stress;GO:0050896//response to stimulus;GO:0002376//immune system process;GO:0008150//biological_process;GO:0044419//interspecies interaction between organisms;GO:0044403//symbiosis, encompassing mutualism through parasitism;GO:0051704//multi-organism process
ENSG00000123584	0.35	0.0733333	-2.25481	0.000480651	0.203095	yes	MAGEA9	MAGE family member A9 [Source:HGNC Symbol;Acc:HGNC:6807]	-	-	-	-	GO:0005575//cellular_component	GO:0003674//molecular_function	GO:0008150//biological_process
ENSG00000173193	11.57	18.6133	0.685948	0.000115584	0.0808367	yes	PARP14	poly(ADP-ribose) polymerase family member 14 [Source:HGNC Symbol;Acc:HGNC:29232]	-	-	-	-	GO:0005622//intracellular;GO:0043231//intracellular membrane-bounded organelle;GO:0043229//intracellular organelle;GO:0005737//cytoplasm;GO:0043227//membrane-bounded organelle;GO:0044424//intracellular part;GO:0005575//cellular_component;GO:0005623//cell;GO:0005634//nucleus;GO:0044464//cell part;GO:0043226//organelle	GO:0003674//molecular_function;GO:0003824//catalytic activity;GO:0016740//transferase activity;GO:0016757//transferase activity, transferring glycosyl groups	GO:0034641//cellular nitrogen compound metabolic process;GO:0008152//metabolic process;GO:0044237//cellular metabolic process;GO:0009987//cellular process;GO:0006807//nitrogen compound metabolic process;GO:0008150//biological_process;GO:0009058//biosynthetic process
XLOC_030519	0.6	0.0233333	-4.6845	0.00069975	0.278281	yes	TCONS_00195545	PREDICTED: 60S ribosomal protein L7a-like [Aotus nancymaae]	Genetic Information Processing	Translation	ko03010//Ribosome	K02936	GO:0044422//organelle part;GO:0043229//intracellular organelle;GO:0044446//intracellular organelle part;GO:0030054//cell junction;GO:0030529//intracellular ribonucleoprotein complex;GO:0005622//intracellular;GO:0005737//cytoplasm;GO:0043228//non-membrane-bounded organelle;GO:0043231//intracellular membrane-bounded organelle;GO:0044424//intracellular part;GO:0032991//macromolecular complex;GO:0043…	GO:1901363//heterocyclic compound binding;GO:0003676//nucleic acid binding;GO:0097159//organic cyclic compound binding;GO:0005198//structural molecule activity;GO:0003723//RNA binding;GO:0005488//binding	GO:0045184//establishment of protein localization;GO:0022411//cellular component disassembly;GO:0009058//biosynthetic process;GO:0043043//peptide biosynthetic process;GO:0034641//cellular nitrogen compound metabolic process;GO:0033036//macromolecule localization;GO:1901566//organonitrogen compound biosynthetic process;GO:0006725//cellular aromatic compound metabolic process;GO:0043933//macromolec…
ENSG00000170581	42.1233	73.7967	0.727329	0.000988312	0.441675	yes	STAT2	signal transducer and activator of transcription 2 [Source:HGNC Symbol;Acc:HGNC:11363]	Environmental Information Processing;Human Diseases;Organismal Systems	Immune system;Development;Infectious diseases;Signal transduction	ko05168//Herpes simplex infection;ko05164//Influenza A;ko04062//Chemokine signaling pathway;ko04621//NOD-like receptor signaling pathway;ko04380//Osteoclast differentiation;ko04630//Jak-STAT signaling pathway;ko05161//Hepatitis B;ko05162//Measles;ko05160//Hepatitis C	K11221	GO:0031974//membrane-enclosed lumen;GO:0044444//cytoplasmic part;GO:0005622//intracellular;GO:0044424//intracellular part;GO:0043233//organelle lumen;GO:0005634//nucleus;GO:0005886//plasma membrane;GO:0043231//intracellular membrane-bounded organelle;GO:0005654//nucleoplasm;GO:0070013//intracellular organelle lumen;GO:0071944//cell periphery;GO:0005575//cellular_component;GO:0043226//organelle;GO…	GO:0001071//nucleic acid binding transcription factor activity;GO:0097159//organic cyclic compound binding;GO:0005488//binding;GO:1901363//heterocyclic compound binding;GO:0003677//DNA binding;GO:0004871//signal transducer activity;GO:0003674//molecular_function;GO:0003676//nucleic acid binding	GO:0036211//protein modification process;GO:0050789//regulation of biological process;GO:0071840//cellular component organization or biogenesis;GO:0071704//organic substance metabolic process;GO:0048856//anatomical structure development;GO:0044237//cellular metabolic process;GO:0051704//multi-organism process;GO:0050794//regulation of cellular process;GO:0007005//mitochondrion organization;GO:000…
ENSG00000105808	0.996667	0.41	-1.28149	0.000879216	0.293749	yes	RASA4	RAS p21 protein activator 4 [Source:HGNC Symbol;Acc:HGNC:23181]	Environmental Information Processing	Signal transduction	ko04014//Ras signaling pathway	K17630	GO:0005623//cell;GO:0005575//cellular_component;GO:0016020//membrane;GO:0044464//cell part;GO:0005829//cytosol;GO:0044444//cytoplasmic part;GO:0071944//cell periphery;GO:0005886//plasma membrane;GO:0005622//intracellular;GO:0005737//cytoplasm;GO:0044424//intracellular part	GO:0005488//binding;GO:0043167//ion binding;GO:0030234//enzyme regulator activity;GO:0003674//molecular_function;GO:0098772//molecular function regulator	GO:0050789//regulation of biological process;GO:0009987//cellular process;GO:0007165//signal transduction;GO:0044237//cellular metabolic process;GO:0007154//cell communication;GO:0043170//macromolecule metabolic process;GO:0036211//protein modification process;GO:0065007//biological regulation;GO:0044699//single-organism process;GO:0023052//signaling;GO:0044238//primary metabolic process;GO:00508…
ENSG00000205413	6.31	11.8033	0.903482	0.000288164	0.14986	yes	SAMD9	sterile alpha motif domain containing 9 [Source:HGNC Symbol;Acc:HGNC:1348]	-	-	-	-	GO:0043226//organelle;GO:0005737//cytoplasm;GO:0005575//cellular_component;GO:0044464//cell part;GO:0005623//cell;GO:0005622//intracellular;GO:0044424//intracellular part	GO:0003674//molecular_function	-
ENSG00000025708	6.02	9.20667	0.612915	0.000226647	0.128591	yes	TYMP	thymidine phosphorylase [Source:HGNC Symbol;Acc:HGNC:3148]	Metabolism;Human Diseases	Xenobiotics biodegradation and metabolism;Cancers;Nucleotide metabolism	ko00240//Pyrimidine metabolism;ko00983//Drug metabolism - other enzymes;ko05219//Bladder cancer	K00758	GO:0005737//cytoplasm;GO:0005829//cytosol;GO:0005575//cellular_component;GO:0044424//intracellular part;GO:0044444//cytoplasmic part;GO:0005623//cell;GO:0005622//intracellular;GO:0044464//cell part	GO:0003674//molecular_function;GO:0003824//catalytic activity;GO:0016757//transferase activity, transferring glycosyl groups;GO:0016740//transferase activity	GO:0044699//single-organism process;GO:0046483//heterocycle metabolic process;GO:0007005//mitochondrion organization;GO:0006259//DNA metabolic process;GO:0009987//cellular process;GO:0006139//nucleobase-containing compound metabolic process;GO:0090304//nucleic acid metabolic process;GO:0034655//nucleobase-containing compound catabolic process;GO:0046700//heterocycle catabolic process;GO:0019439//…
ENSG00000260001	6.28333	9.52333	0.599937	1.58439e-05	0.0189027	yes	TGFBR3L	transforming growth factor beta receptor 3 like [Source:HGNC Symbol;Acc:HGNC:44152]	-	-	-	-	GO:0005575//cellular_component	-	-
ENSG00000281991	0.04	0.963333	4.58996	2.15169e-07	0.000436405	yes	TMEM265	transmembrane protein 265 [Source:HGNC Symbol;Acc:HGNC:51241]	-	-	-	-	GO:0005575//cellular_component	-	GO:0008150//biological_process
ENSG00000121858	5.01667	9.00667	0.844264	0.000102524	0.0770143	yes	TNFSF10	tumor necrosis factor superfamily member 10 [Source:HGNC Symbol;Acc:HGNC:11925]	Organismal Systems;Human Diseases;Environmental Information Processing;Cellular Processes	Signal transduction;Signaling molecules and interaction;Infectious diseases;Cell growth and death;Immune system	ko04060//Cytokine-cytokine receptor interaction;ko04650//Natural killer cell mediated cytotoxicity;ko05164//Influenza A;ko05162//Measles;ko04210//Apoptosis;ko04068//FoxO signaling pathway	K04721	GO:0044464//cell part;GO:0005623//cell;GO:0016020//membrane;GO:0005576//extracellular region;GO:0005615//extracellular space;GO:0043226//organelle;GO:0044421//extracellular region part;GO:0005886//plasma membrane;GO:0071944//cell periphery;GO:0005575//cellular_component	GO:0043167//ion binding;GO:0003674//molecular_function;GO:0005488//binding	GO:0044700//single organism signaling;GO:0023052//signaling;GO:0065007//biological regulation;GO:0007154//cell communication;GO:0007005//mitochondrion organization;GO:0050896//response to stimulus;GO:0016043//cellular component organization;GO:0050794//regulation of cellular process;GO:0008219//cell death;GO:0044763//single-organism cellular process;GO:0032502//developmental process;GO:0051716//c…
ENSG00000132530	5.59333	11.3833	1.02514	0.000192821	0.121774	yes	XAF1	XIAP associated factor 1 [Source:HGNC Symbol;Acc:HGNC:30932]	-	-	-	-	GO:0005575//cellular_component;GO:0005634//nucleus;GO:0005622//intracellular;GO:0044444//cytoplasmic part;GO:0044464//cell part;GO:0005737//cytoplasm;GO:0043231//intracellular membrane-bounded organelle;GO:0043227//membrane-bounded organelle;GO:0043226//organelle;GO:0005623//cell;GO:0005739//mitochondrion;GO:0044424//intracellular part;GO:0005829//cytosol;GO:0043229//intracellular organelle	GO:0043167//ion binding;GO:0003674//molecular_function;GO:0005488//binding	GO:0044700//single organism signaling;GO:0065003//macromolecular complex assembly;GO:0007165//signal transduction;GO:0050789//regulation of biological process;GO:0044085//cellular component biogenesis;GO:0006950//response to stress;GO:0070271//protein complex biogenesis;GO:0065007//biological regulation;GO:0071822//protein complex subunit organization;GO:0044699//single-organism process;GO:002260…

## Sheet: C vs 200 dif
id	GC_fpkm	G200_fpkm	log2(FC)	Pvalue	FDR	significant	Symbol	Description	KEGG_A_class	KEGG_B_class	Pathway	K_ID	GO Component	GO Function	GO Process
ENSG00000089127	230.193	373.06	0.696562	9.74196e-05	0.0442013	yes	OAS1	2'-5'-oligoadenylate synthetase 1 [Source:HGNC Symbol;Acc:HGNC:8086]	Human Diseases;Organismal Systems	Infectious diseases;Immune system	ko05168//Herpes simplex infection;ko05164//Influenza A;ko04621//NOD-like receptor signaling pathway;ko05162//Measles;ko05160//Hepatitis C	K14216	GO:0043227//membrane-bounded organelle;GO:0044444//cytoplasmic part;GO:0043229//intracellular organelle;GO:0005739//mitochondrion;GO:0043226//organelle;GO:0044424//intracellular part;GO:0044464//cell part;GO:0005622//intracellular;GO:0005783//endoplasmic reticulum;GO:0043231//intracellular membrane-bounded organelle;GO:0005737//cytoplasm;GO:0005634//nucleus;GO:0012505//endomembrane system;GO:0005…	GO:0016779//nucleotidyltransferase activity;GO:0003676//nucleic acid binding;GO:0003824//catalytic activity;GO:0016740//transferase activity;GO:0003723//RNA binding;GO:0097159//organic cyclic compound binding;GO:0016772//transferase activity, transferring phosphorus-containing groups;GO:0003674//molecular_function;GO:0043167//ion binding;GO:0005488//binding;GO:1901363//heterocyclic compound bindi…	GO:0044419//interspecies interaction between organisms;GO:0007165//signal transduction;GO:0042592//homeostatic process;GO:0002376//immune system process;GO:0065007//biological regulation;GO:0051704//multi-organism process;GO:0008150//biological_process;GO:0044403//symbiosis, encompassing mutualism through parasitism;GO:0071704//organic substance metabolic process;GO:0006950//response to stress;GO…
ENSG00000111335	38.6133	75.5567	0.96846	3.96181e-05	0.0274663	yes	OAS2	2'-5'-oligoadenylate synthetase 2 [Source:HGNC Symbol;Acc:HGNC:8087]	Organismal Systems;Human Diseases	Immune system;Infectious diseases	ko05168//Herpes simplex infection;ko05164//Influenza A;ko04621//NOD-like receptor signaling pathway;ko05162//Measles;ko05160//Hepatitis C	K14216	GO:0005634//nucleus;GO:0044444//cytoplasmic part;GO:0044464//cell part;GO:0012505//endomembrane system;GO:0043227//membrane-bounded organelle;GO:0005623//cell;GO:0005783//endoplasmic reticulum;GO:0005622//intracellular;GO:0043226//organelle;GO:0005829//cytosol;GO:0044424//intracellular part;GO:0005575//cellular_component;GO:0043231//intracellular membrane-bounded organelle;GO:0043229//intracellul…	GO:0003676//nucleic acid binding;GO:0016772//transferase activity, transferring phosphorus-containing groups;GO:0097159//organic cyclic compound binding;GO:0003824//catalytic activity;GO:0016740//transferase activity;GO:0043167//ion binding;GO:1901363//heterocyclic compound binding;GO:0005488//binding;GO:0016779//nucleotidyltransferase activity;GO:0003674//molecular_function;GO:0003723//RNA bindi…	GO:0044267//cellular protein metabolic process;GO:0006464//cellular protein modification process;GO:0023052//signaling;GO:0036211//protein modification process;GO:0050794//regulation of cellular process;GO:1901361//organic cyclic compound catabolic process;GO:0051704//multi-organism process;GO:0065007//biological regulation;GO:0043412//macromolecule modification;GO:0044248//cellular catabolic pro…
ENSG00000111331	110.563	184.467	0.738487	5.16508e-05	0.0301872	yes	OAS3	2'-5'-oligoadenylate synthetase 3 [Source:HGNC Symbol;Acc:HGNC:8088]	Human Diseases;Organismal Systems	Infectious diseases;Immune system	ko05168//Herpes simplex infection;ko05164//Influenza A;ko04621//NOD-like receptor signaling pathway;ko05162//Measles;ko05160//Hepatitis C	K14216	GO:0044446//intracellular organelle part;GO:0005623//cell;GO:0005886//plasma membrane;GO:0005575//cellular_component;GO:0005654//nucleoplasm;GO:0043227//membrane-bounded organelle;GO:0043231//intracellular membrane-bounded organelle;GO:0044444//cytoplasmic part;GO:0005615//extracellular space;GO:0070013//intracellular organelle lumen;GO:0005576//extracellular region;GO:0044421//extracellular regi…	GO:0003674//molecular_function;GO:0097159//organic cyclic compound binding;GO:0016740//transferase activity;GO:0003824//catalytic activity;GO:1901363//heterocyclic compound binding;GO:0043167//ion binding;GO:0003676//nucleic acid binding;GO:0005488//binding;GO:0003723//RNA binding;GO:0016772//transferase activity, transferring phosphorus-containing groups;GO:0016779//nucleotidyltransferase activi…	GO:0034641//cellular nitrogen compound metabolic process;GO:0007154//cell communication;GO:0065007//biological regulation;GO:0044419//interspecies interaction between organisms;GO:0009987//cellular process;GO:0044403//symbiosis, encompassing mutualism through parasitism;GO:0008150//biological_process;GO:0050794//regulation of cellular process;GO:0044699//single-organism process;GO:0050896//respon…
ENSG00000100342	7.01333	11.5	0.713462	3.2407e-06	0.00407214	yes	APOL1	apolipoprotein L1 [Source:HGNC Symbol;Acc:HGNC:618]	Human Diseases	Infectious diseases	ko05143//African trypanosomiasis	K14480	GO:0005576//extracellular region;GO:0044421//extracellular region part;GO:0005575//cellular_component;GO:0005615//extracellular space	GO:0022857//transmembrane transporter activity;GO:0008289//lipid binding;GO:0005215//transporter activity;GO:0003674//molecular_function;GO:0005488//binding	GO:0071704//organic substance metabolic process;GO:0044763//single-organism cellular process;GO:0002376//immune system process;GO:0044238//primary metabolic process;GO:0051179//localization;GO:0006950//response to stress;GO:0008150//biological_process;GO:0051234//establishment of localization;GO:1902578//single-organism localization;GO:0050896//response to stimulus;GO:0044710//single-organism met…
ENSG00000168062	1.8	4.24	1.23607	1.61049e-06	0.00249068	yes	BATF2	basic leucine zipper ATF-like transcription factor 2 [Source:HGNC Symbol;Acc:HGNC:25163]	-	-	-	-	GO:0043226//organelle;GO:0005575//cellular_component;GO:0043227//membrane-bounded organelle;GO:0005623//cell;GO:0044464//cell part;GO:0043231//intracellular membrane-bounded organelle;GO:0043229//intracellular organelle;GO:0044424//intracellular part;GO:0005634//nucleus;GO:0005622//intracellular	GO:0003676//nucleic acid binding;GO:0097159//organic cyclic compound binding;GO:0003674//molecular_function;GO:0005488//binding;GO:0001071//nucleic acid binding transcription factor activity;GO:0003677//DNA binding;GO:1901363//heterocyclic compound binding	GO:0008152//metabolic process;GO:0050896//response to stimulus;GO:0044699//single-organism process;GO:0034641//cellular nitrogen compound metabolic process;GO:0044237//cellular metabolic process;GO:0044767//single-organism developmental process;GO:0009987//cellular process;GO:0006950//response to stress;GO:0009058//biosynthetic process;GO:0002376//immune system process;GO:0032502//developmental p…
ENSG00000130813	32.81	59.42	0.856813	9.64348e-05	0.0442013	yes	C19orf66	chromosome 19 open reading frame 66 [Source:HGNC Symbol;Acc:HGNC:25649]	-	-	-	-	GO:0043231//intracellular membrane-bounded organelle;GO:0043229//intracellular organelle;GO:0043226//organelle;GO:0005622//intracellular;GO:0044424//intracellular part;GO:0005737//cytoplasm;GO:0005575//cellular_component;GO:0005623//cell;GO:0044464//cell part;GO:0005634//nucleus;GO:0043227//membrane-bounded organelle	GO:0003676//nucleic acid binding;GO:0005488//binding;GO:0003723//RNA binding;GO:1901363//heterocyclic compound binding;GO:0097159//organic cyclic compound binding;GO:0003674//molecular_function	GO:0044403//symbiosis, encompassing mutualism through parasitism;GO:0044419//interspecies interaction between organisms;GO:0002376//immune system process;GO:0051704//multi-organism process;GO:0006950//response to stress;GO:0008150//biological_process;GO:0050896//response to stimulus
ENSG00000184374	0.233333	0.001	-7.86625	0.00060039	0.152366	yes	COLEC10	collectin subfamily member 10 [Source:HGNC Symbol;Acc:HGNC:2220]	-	-	-	-	GO:0005737//cytoplasm;GO:0043234//protein complex;GO:0044464//cell part;GO:0005622//intracellular;GO:0044424//intracellular part;GO:0005575//cellular_component;GO:0032991//macromolecular complex;GO:0005576//extracellular region;GO:0005623//cell	GO:0003674//molecular_function;GO:0016787//hydrolase activity;GO:0008233//peptidase activity;GO:0003824//catalytic activity	GO:0002376//immune system process;GO:0008150//biological_process
ENSG00000140465	2.48	4.01333	0.694461	0.000169064	0.0629451	yes	CYP1A1	cytochrome P450 family 1 subfamily A member 1 [Source:HGNC Symbol;Acc:HGNC:2595]	Metabolism;Organismal Systems;Human Diseases	Lipid metabolism;Amino acid metabolism;Xenobiotics biodegradation and metabolism;Endocrine system;Metabolism of cofactors and vitamins;Cancers	ko05204//Chemical carcinogenesis;ko00980//Metabolism of xenobiotics by cytochrome P450;ko00140//Steroid hormone biosynthesis;ko00830//Retinol metabolism;ko04913//Ovarian Steroidogenesis;ko00380//Tryptophan metabolism	K07408	GO:0043226//organelle;GO:0044444//cytoplasmic part;GO:0005575//cellular_component;GO:0043229//intracellular organelle;GO:0005622//intracellular;GO:0012505//endomembrane system;GO:0043231//intracellular membrane-bounded organelle;GO:0005623//cell;GO:0005737//cytoplasm;GO:0005739//mitochondrion;GO:0044464//cell part;GO:0043227//membrane-bounded organelle;GO:0044424//intracellular part;GO:0005783//e…	GO:0003674//molecular_function;GO:0005515//protein binding;GO:0005488//binding;GO:0043167//ion binding;GO:0019899//enzyme binding;GO:0016491//oxidoreductase activity;GO:0003824//catalytic activity	GO:0007049//cell cycle;GO:0048869//cellular developmental process;GO:0006950//response to stress;GO:0030154//cell differentiation;GO:0044237//cellular metabolic process;GO:0071704//organic substance metabolic process;GO:0044281//small molecule metabolic process;GO:0044403//symbiosis, encompassing mutualism through parasitism;GO:0009790//embryo development;GO:0044238//primary metabolic process;GO:…
ENSG00000181381	33.2533	59.4667	0.838582	1.04422e-06	0.00177233	yes	DDX60L	DEAD-box helicase 60-like [Source:HGNC Symbol;Acc:HGNC:26429]	-	-	-	-	-	GO:0016787//hydrolase activity;GO:0003676//nucleic acid binding;GO:0004386//helicase activity;GO:0003723//RNA binding;GO:0005488//binding;GO:0017111//nucleoside-triphosphatase activity;GO:0097159//organic cyclic compound binding;GO:0003674//molecular_function;GO:0016817//hydrolase activity, acting on acid anhydrides;GO:0016818//hydrolase activity, acting on acid anhydrides, in phosphorus-containi…	-
ENSG00000163840	40.3067	64.01	0.667279	0.00087315	0.178612	yes	DTX3L	deltex E3 ubiquitin ligase 3L [Source:HGNC Symbol;Acc:HGNC:30323]	Environmental Information Processing	Signal transduction	ko04330//Notch signaling pathway	K06058	GO:0044428//nuclear part;GO:0005829//cytosol;GO:0044424//intracellular part;GO:0043231//intracellular membrane-bounded organelle;GO:0043226//organelle;GO:0031981//nuclear lumen;GO:0005654//nucleoplasm;GO:0005623//cell;GO:0070013//intracellular organelle lumen;GO:0005622//intracellular;GO:0043227//membrane-bounded organelle;GO:0044444//cytoplasmic part;GO:0005737//cytoplasm;GO:0043229//intracellul…	GO:0005515//protein binding;GO:0003674//molecular_function;GO:0042393//histone binding;GO:0003824//catalytic activity;GO:0016874//ligase activity;GO:0005488//binding;GO:0043167//ion binding	GO:0050896//response to stimulus;GO:0046483//heterocycle metabolic process;GO:0044267//cellular protein metabolic process;GO:0006725//cellular aromatic compound metabolic process;GO:0090304//nucleic acid metabolic process;GO:0071704//organic substance metabolic process;GO:0006259//DNA metabolic process;GO:0006464//cellular protein modification process;GO:0034641//cellular nitrogen compound metabo…
ENSG00000137628	8.11333	15.08	0.89427	1.31528e-08	8.81457e-05	yes	DDX60	DEXD/H-box helicase 60 [Source:HGNC Symbol;Acc:HGNC:25942]	-	-	-	-	GO:0005622//intracellular;GO:0043232//intracellular non-membrane-bounded organelle;GO:0005575//cellular_component;GO:0005856//cytoskeleton;GO:0044424//intracellular part;GO:0005623//cell;GO:0005737//cytoplasm;GO:0043228//non-membrane-bounded organelle;GO:0043226//organelle;GO:0044464//cell part;GO:0043229//intracellular organelle	GO:0016817//hydrolase activity, acting on acid anhydrides;GO:0003676//nucleic acid binding;GO:0003677//DNA binding;GO:0016462//pyrophosphatase activity;GO:1901363//heterocyclic compound binding;GO:0097159//organic cyclic compound binding;GO:0016787//hydrolase activity;GO:0003674//molecular_function;GO:0003824//catalytic activity;GO:0017111//nucleoside-triphosphatase activity;GO:0005488//binding;G…	GO:0051716//cellular response to stimulus;GO:0044700//single organism signaling;GO:0009987//cellular process;GO:0051704//multi-organism process;GO:0002376//immune system process;GO:0007165//signal transduction;GO:0006950//response to stress;GO:0023052//signaling;GO:0007154//cell communication;GO:0044419//interspecies interaction between organisms;GO:0050896//response to stimulus;GO:0050794//regul…
ENSG00000010030	0.17	0.706667	2.0555	0.000224381	0.0742307	yes	ETV7	ETS variant 7 [Source:HGNC Symbol;Acc:HGNC:18160]	Organismal Systems;Human Diseases	Cancers;Development	ko05202//Transcriptional misregulation in cancers;ko04320//Dorso-ventral axis formation	K03211	GO:0044446//intracellular organelle part;GO:0043229//intracellular organelle;GO:0043227//membrane-bounded organelle;GO:0005634//nucleus;GO:0005623//cell;GO:0044424//intracellular part;GO:0005575//cellular_component;GO:0031981//nuclear lumen;GO:0031974//membrane-enclosed lumen;GO:0043233//organelle lumen;GO:0005622//intracellular;GO:0070013//intracellular organelle lumen;GO:0043231//intracellular …	GO:0005488//binding;GO:1901363//heterocyclic compound binding;GO:0003677//DNA binding;GO:0003676//nucleic acid binding;GO:0003674//molecular_function;GO:0097159//organic cyclic compound binding;GO:0001071//nucleic acid binding transcription factor activity	GO:0032502//developmental process;GO:0009987//cellular process;GO:0044767//single-organism developmental process;GO:0030154//cell differentiation;GO:0009058//biosynthetic process;GO:0008150//biological_process;GO:0044763//single-organism cellular process;GO:0034641//cellular nitrogen compound metabolic process;GO:0006807//nitrogen compound metabolic process;GO:0044237//cellular metabolic process;…
ENSG00000168961	8.15333	20.5567	1.33414	2.47832e-07	0.000830443	yes	LGALS9	galectin 9 [Source:HGNC Symbol;Acc:HGNC:6570]	-	-	-	-	GO:0005622//intracellular;GO:0005623//cell;GO:0043229//intracellular organelle;GO:0044421//extracellular region part;GO:0043227//membrane-bounded organelle;GO:0005575//cellular_component;GO:0044464//cell part;GO:0005737//cytoplasm;GO:0005615//extracellular space;GO:0043226//organelle;GO:0043231//intracellular membrane-bounded organelle;GO:0005576//extracellular region;GO:0005634//nucleus;GO:00444…	GO:0019899//enzyme binding;GO:0005515//protein binding;GO:0005488//binding;GO:0003674//molecular_function;GO:0004871//signal transducer activity	GO:0008283//cell proliferation;GO:0006605//protein targeting;GO:0007155//cell adhesion;GO:0051674//localization of cell;GO:0065007//biological regulation;GO:0051704//multi-organism process;GO:0051234//establishment of localization;GO:0048856//anatomical structure development;GO:0006950//response to stress;GO:0044700//single organism signaling;GO:0044763//single-organism cellular process;GO:001626…
ENSG00000283430	2.82	0.001	-11.4615	4.28663e-07	0.00123118	yes	AL513122.2	Gelsolin [Source:UniProtKB/Swiss-Prot;Acc:P06396]	-	-	-	-	GO:0043227//membrane-bounded organelle;GO:0043229//intracellular organelle;GO:0044424//intracellular part;GO:0005576//extracellular region;GO:0005856//cytoskeleton;GO:0043232//intracellular non-membrane-bounded organelle;GO:0005634//nucleus;GO:0032991//macromolecular complex;GO:0005886//plasma membrane;GO:0043234//protein complex;GO:0005829//cytosol;GO:0044444//cytoplasmic part;GO:0005615//extrac…	GO:0008092//cytoskeletal protein binding;GO:0005488//binding;GO:0005515//protein binding;GO:0043167//ion binding;GO:0003674//molecular_function	GO:0000902//cell morphogenesis;GO:0050789//regulation of biological process;GO:0051674//localization of cell;GO:0051179//localization;GO:0007165//signal transduction;GO:0071704//organic substance metabolic process;GO:0071840//cellular component organization or biogenesis;GO:0016192//vesicle-mediated transport;GO:0007155//cell adhesion;GO:0044238//primary metabolic process;GO:0007010//cytoskeleton…
ENSG00000117228	0.803333	1.67333	1.05865	9.89812e-06	0.00995008	yes	GBP1	guanylate binding protein 1 [Source:HGNC Symbol;Acc:HGNC:4182]	Organismal Systems	Immune system	ko04621//NOD-like receptor signaling pathway	K20899	GO:0005575//cellular_component;GO:0005829//cytosol;GO:0016020//membrane;GO:0005794//Golgi apparatus;GO:0005622//intracellular;GO:0005737//cytoplasm;GO:0044424//intracellular part;GO:0005576//extracellular region;GO:0044464//cell part;GO:0043231//intracellular membrane-bounded organelle;GO:0071944//cell periphery;GO:0005623//cell;GO:0043226//organelle;GO:0043229//intracellular organelle;GO:0043227…	GO:0008092//cytoskeletal protein binding;GO:0016787//hydrolase activity;GO:0003824//catalytic activity;GO:0003674//molecular_function;GO:0003924//GTPase activity;GO:0017111//nucleoside-triphosphatase activity;GO:0005488//binding;GO:0016462//pyrophosphatase activity;GO:0016818//hydrolase activity, acting on acid anhydrides, in phosphorus-containing anhydrides;GO:0019899//enzyme binding;GO:0005515/…	GO:0006950//response to stress;GO:0006464//cellular protein modification process;GO:0016043//cellular component organization;GO:0043170//macromolecule metabolic process;GO:0051179//localization;GO:0044802//single-organism membrane organization;GO:0050794//regulation of cellular process;GO:0000902//cell morphogenesis;GO:0032502//developmental process;GO:0044419//interspecies interaction between or…
XLOC_020321	0.001	0.51	8.99435	2.26445e-07	0.000830443	yes	TCONS_00132615	hCG2030582 [Homo sapiens]	-	-	-	-	GO:0044424//intracellular part;GO:0043226//organelle;GO:0043229//intracellular organelle;GO:0005622//intracellular;GO:0044464//cell part;GO:0043231//intracellular membrane-bounded organelle;GO:0005623//cell;GO:0043227//membrane-bounded organelle	GO:0097159//organic cyclic compound binding;GO:0003676//nucleic acid binding;GO:1901363//heterocyclic compound binding;GO:0004842//ubiquitin-protein transferase activity;GO:0043167//ion binding;GO:0005488//binding;GO:0019787//ubiquitin-like protein transferase activity;GO:0043169//cation binding;GO:0003824//catalytic activity;GO:0016740//transferase activity	GO:0032501//multicellular organismal process;GO:0009058//biosynthetic process;GO:0043170//macromolecule metabolic process;GO:0044267//cellular protein metabolic process;GO:0065007//biological regulation;GO:0000209//protein polyubiquitination;GO:0044699//single-organism process;GO:0008152//metabolic process;GO:0010468//regulation of gene expression;GO:0050789//regulation of biological process;GO:0…
ENSG00000138642	28.82	43.83	0.604848	0.000606281	0.152366	yes	HERC6	HECT and RLD domain containing E3 ubiquitin protein ligase family member 6 [Source:HGNC Symbol;Acc:HGNC:26072]	-	-	-	-	GO:0043227//membrane-bounded organelle;GO:0043226//organelle;GO:0005829//cytosol;GO:0005622//intracellular;GO:0005575//cellular_component;GO:0005737//cytoplasm;GO:0043229//intracellular organelle;GO:0044424//intracellular part;GO:0044464//cell part;GO:0005634//nucleus;GO:0005623//cell;GO:0043231//intracellular membrane-bounded organelle;GO:0044444//cytoplasmic part	GO:0003674//molecular_function;GO:0016874//ligase activity;GO:0003824//catalytic activity	GO:0009987//cellular process;GO:0002376//immune system process;GO:0044237//cellular metabolic process;GO:0009056//catabolic process;GO:0044763//single-organism cellular process;GO:0043170//macromolecule metabolic process;GO:0006464//cellular protein modification process;GO:0030154//cell differentiation;GO:0032502//developmental process;GO:0044767//single-organism developmental process;GO:0044260/…
ENSG00000054392	0.543333	1.29	1.24746	0.000973896	0.188271	yes	HHAT	hedgehog acyltransferase [Source:HGNC Symbol;Acc:HGNC:18270]	-	-	-	-	GO:0005575//cellular_component;GO:0005737//cytoplasm;GO:0012505//endomembrane system;GO:0043231//intracellular membrane-bounded organelle;GO:0043226//organelle;GO:0005622//intracellular;GO:0005783//endoplasmic reticulum;GO:0043227//membrane-bounded organelle;GO:0044464//cell part;GO:0044444//cytoplasmic part;GO:0043229//intracellular organelle;GO:0005623//cell;GO:0044424//intracellular part	GO:0003674//molecular_function;GO:0016746//transferase activity, transferring acyl groups;GO:0003824//catalytic activity;GO:0016740//transferase activity	GO:0023052//signaling;GO:0019538//protein metabolic process;GO:0050794//regulation of cellular process;GO:0051179//localization;GO:0033036//macromolecule localization;GO:0008152//metabolic process;GO:0051649//establishment of localization in cell;GO:0007005//mitochondrion organization;GO:0006605//protein targeting;GO:0006810//transport;GO:0051716//cellular response to stimulus;GO:0044260//cellula…
ENSG00000196684	3.79667	8.83	1.21768	7.94682e-06	0.0085535	yes	HSH2D	hematopoietic SH2 domain containing [Source:HGNC Symbol;Acc:HGNC:24920]	-	-	-	-	GO:0043227//membrane-bounded organelle;GO:0044444//cytoplasmic part;GO:0005739//mitochondrion;GO:0044424//intracellular part;GO:0044464//cell part;GO:0005623//cell;GO:0043229//intracellular organelle;GO:0005634//nucleus;GO:0005737//cytoplasm;GO:0005622//intracellular;GO:0005829//cytosol;GO:0005575//cellular_component;GO:0043226//organelle;GO:0043231//intracellular membrane-bounded organelle	GO:0005488//binding;GO:0030674//protein binding, bridging;GO:0060090//binding, bridging;GO:0003674//molecular_function;GO:0005515//protein binding	GO:0016265//death;GO:0065008//regulation of biological quality;GO:0042592//homeostatic process;GO:0007155//cell adhesion;GO:0044699//single-organism process;GO:0022610//biological adhesion;GO:0008150//biological_process;GO:0065007//biological regulation;GO:0002376//immune system process;GO:0044763//single-organism cellular process;GO:0009987//cellular process;GO:0008219//cell death
ENSG00000274267	0.193333	1.25	2.69277	0.000834526	0.174868	yes	HIST1H3B	histone cluster 1, H3b [Source:HGNC Symbol;Acc:HGNC:4776]	Human Diseases	Substance dependence;Cancers;Immune diseases	ko05322//Systemic lupus erythematosus;ko05202//Transcriptional misregulation in cancers;ko05034//Alcoholism	K11253	GO:0043234//protein complex;GO:0044464//cell part;GO:0044424//intracellular part;GO:0070013//intracellular organelle lumen;GO:0031974//membrane-enclosed lumen;GO:0005694//chromosome;GO:0043229//intracellular organelle;GO:0005622//intracellular;GO:0044446//intracellular organelle part;GO:0005634//nucleus;GO:0005575//cellular_component;GO:0043228//non-membrane-bounded organelle;GO:0044422//organell…	GO:0005515//protein binding;GO:0005488//binding;GO:0042393//histone binding;GO:0003677//DNA binding;GO:0003674//molecular_function;GO:0003676//nucleic acid binding;GO:0097159//organic cyclic compound binding;GO:1901363//heterocyclic compound binding	GO:0006914//autophagy;GO:0016043//cellular component organization;GO:0008150//biological_process;GO:0008152//metabolic process;GO:0044237//cellular metabolic process;GO:0007155//cell adhesion;GO:0022610//biological adhesion;GO:0050896//response to stimulus;GO:0043933//macromolecular complex subunit organization;GO:0022607//cellular component assembly;GO:0044419//interspecies interaction between o…
ENSG00000105991	0.13	0.001	-7.02237	0.00036914	0.109141	yes	HOXA1	homeobox A1 [Source:HGNC Symbol;Acc:HGNC:5099]	-	-	-	-	GO:0005575//cellular_component;GO:0043231//intracellular membrane-bounded organelle;GO:0044464//cell part;GO:0043226//organelle;GO:0044424//intracellular part;GO:0043229//intracellular organelle;GO:0005622//intracellular;GO:0005634//nucleus;GO:0043227//membrane-bounded organelle;GO:0005623//cell	GO:0097159//organic cyclic compound binding;GO:1901363//heterocyclic compound binding;GO:0003674//molecular_function;GO:0003676//nucleic acid binding;GO:0003677//DNA binding;GO:0005488//binding	GO:0048646//anatomical structure formation involved in morphogenesis;GO:0032501//multicellular organismal process;GO:0009653//anatomical structure morphogenesis;GO:0044699//single-organism process;GO:0034641//cellular nitrogen compound metabolic process;GO:0003008//system process;GO:0044237//cellular metabolic process;GO:0009987//cellular process;GO:0009790//embryo development;GO:0008150//biologi…
ENSG00000274049	0.556667	0.001	-9.12067	5.40532e-05	0.0301872	yes	INO80B-WBP1	INO80B-WBP1 readthrough (NMD candidate) [Source:HGNC Symbol;Acc:HGNC:49199]	-	-	-	-	GO:0031981//nuclear lumen;GO:0044428//nuclear part;GO:0043232//intracellular non-membrane-bounded organelle;GO:0032991//macromolecular complex;GO:0005694//chromosome;GO:0070013//intracellular organelle lumen;GO:0005634//nucleus;GO:0043227//membrane-bounded organelle;GO:0043231//intracellular membrane-bounded organelle;GO:0043226//organelle;GO:0044446//intracellular organelle part;GO:0043234//prot…	-	GO:0009058//biosynthetic process;GO:0016043//cellular component organization;GO:0008150//biological_process;GO:0009987//cellular process;GO:0008152//metabolic process;GO:0006807//nitrogen compound metabolic process;GO:0051276//chromosome organization;GO:0034641//cellular nitrogen compound metabolic process;GO:0071840//cellular component organization or biogenesis;GO:0044237//cellular metabolic pr…
ENSG00000163565	42.3533	66.7	0.655211	0.000760224	0.166134	yes	IFI16	interferon gamma inducible protein 16 [Source:HGNC Symbol;Acc:HGNC:5395]	Organismal Systems	Immune system	ko04621//NOD-like receptor signaling pathway	K20914	GO:0043233//organelle lumen;GO:0005654//nucleoplasm;GO:0043231//intracellular membrane-bounded organelle;GO:0043228//non-membrane-bounded organelle;GO:0005634//nucleus;GO:0043229//intracellular organelle;GO:0005623//cell;GO:0044446//intracellular organelle part;GO:0031974//membrane-enclosed lumen;GO:0031981//nuclear lumen;GO:0044428//nuclear part;GO:0005829//cytosol;GO:0005730//nucleolus;GO:00055…	GO:0003676//nucleic acid binding;GO:0008134//transcription factor binding;GO:0001071//nucleic acid binding transcription factor activity;GO:0097159//organic cyclic compound binding;GO:0005515//protein binding;GO:1901363//heterocyclic compound binding;GO:0003674//molecular_function;GO:0003677//DNA binding;GO:0005488//binding;GO:0003723//RNA binding	GO:0044700//single organism signaling;GO:0023052//signaling;GO:0034641//cellular nitrogen compound metabolic process;GO:0050789//regulation of biological process;GO:0008152//metabolic process;GO:0044403//symbiosis, encompassing mutualism through parasitism;GO:0044763//single-organism cellular process;GO:0051604//protein maturation;GO:0071704//organic substance metabolic process;GO:0032502//develo…
ENSG00000068079	94.2367	157.287	0.739036	0.000160201	0.0629451	yes	IFI35	interferon induced protein 35 [Source:HGNC Symbol;Acc:HGNC:5399]	-	-	-	-	GO:0005634//nucleus;GO:0043229//intracellular organelle;GO:0044464//cell part;GO:0043227//membrane-bounded organelle;GO:0005829//cytosol;GO:0005623//cell;GO:0005737//cytoplasm;GO:0043231//intracellular membrane-bounded organelle;GO:0044424//intracellular part;GO:0043226//organelle;GO:0044444//cytoplasmic part;GO:0005575//cellular_component;GO:0005622//intracellular	GO:0003674//molecular_function	GO:0050794//regulation of cellular process;GO:0044700//single organism signaling;GO:0007165//signal transduction;GO:0044699//single-organism process;GO:0065007//biological regulation;GO:0007154//cell communication;GO:0050896//response to stimulus;GO:0044763//single-organism cellular process;GO:0006950//response to stress;GO:0009987//cellular process;GO:0023052//signaling;GO:0050789//regulation of…
ENSG00000137965	16.17	26.07	0.689071	0.000683169	0.164408	yes	IFI44	interferon induced protein 44 [Source:HGNC Symbol;Acc:HGNC:16938]	-	-	-	-	GO:0005737//cytoplasm;GO:0005623//cell;GO:0044424//intracellular part;GO:0044464//cell part;GO:0005575//cellular_component;GO:0005622//intracellular	-	GO:0044419//interspecies interaction between organisms;GO:0044403//symbiosis, encompassing mutualism through parasitism;GO:0008150//biological_process;GO:0051704//multi-organism process
ENSG00000137959	11.4933	17.8433	0.634588	0.000289362	0.0909005	yes	IFI44L	interferon induced protein 44 like [Source:HGNC Symbol;Acc:HGNC:17817]	-	-	-	-	GO:0043233//organelle lumen;GO:0043231//intracellular membrane-bounded organelle;GO:0005622//intracellular;GO:0005575//cellular_component;GO:0005654//nucleoplasm;GO:0043227//membrane-bounded organelle;GO:0044422//organelle part;GO:0031974//membrane-enclosed lumen;GO:0043226//organelle;GO:0044424//intracellular part;GO:0044464//cell part;GO:0043229//intracellular organelle;GO:0044446//intracellula…	GO:0003674//molecular_function	GO:0006950//response to stress;GO:0050896//response to stimulus;GO:0002376//immune system process;GO:0008150//biological_process;GO:0044419//interspecies interaction between organisms;GO:0044403//symbiosis, encompassing mutualism through parasitism;GO:0051704//multi-organism process
ENSG00000185885	424.353	657.923	0.632653	1.63369e-05	0.0142806	yes	IFITM1	interferon induced transmembrane protein 1 [Source:HGNC Symbol;Acc:HGNC:5412]	Organismal Systems	Immune system	ko04662//B cell receptor signaling pathway	K19831	GO:0044464//cell part;GO:0005623//cell;GO:0005886//plasma membrane;GO:0005575//cellular_component;GO:0016020//membrane;GO:0071944//cell periphery	GO:0003674//molecular_function;GO:0004871//signal transducer activity	GO:0007165//signal transduction;GO:0006950//response to stress;GO:0044699//single-organism process;GO:0007154//cell communication;GO:0002376//immune system process;GO:0009987//cellular process;GO:0051704//multi-organism process;GO:0048869//cellular developmental process;GO:0051716//cellular response to stimulus;GO:0050789//regulation of biological process;GO:0048870//cell motility;GO:0065007//bio…
ENSG00000115267	18.3867	29.5967	0.686775	0.000736227	0.166134	yes	IFIH1	interferon induced with helicase C domain 1 [Source:HGNC Symbol;Acc:HGNC:18873]	Human Diseases;Organismal Systems	Immune system;Infectious diseases	ko05168//Herpes simplex infection;ko05164//Influenza A;ko05161//Hepatitis B;ko05162//Measles;ko04622//RIG-I-like receptor signaling pathway	K12647	GO:0005623//cell;GO:0044444//cytoplasmic part;GO:0043226//organelle;GO:0043227//membrane-bounded organelle;GO:0005622//intracellular;GO:0005575//cellular_component;GO:0005829//cytosol;GO:0043229//intracellular organelle;GO:0043231//intracellular membrane-bounded organelle;GO:0005634//nucleus;GO:0044424//intracellular part;GO:0044464//cell part;GO:0005737//cytoplasm	GO:0003824//catalytic activity;GO:0043167//ion binding;GO:0017111//nucleoside-triphosphatase activity;GO:0097159//organic cyclic compound binding;GO:1901363//heterocyclic compound binding;GO:0005488//binding;GO:0003676//nucleic acid binding;GO:0016818//hydrolase activity, acting on acid anhydrides, in phosphorus-containing anhydrides;GO:0003674//molecular_function;GO:0003677//DNA binding;GO:00164…	GO:0044260//cellular macromolecule metabolic process;GO:0044700//single organism signaling;GO:0044238//primary metabolic process;GO:0006950//response to stress;GO:0007154//cell communication;GO:0008152//metabolic process;GO:0002376//immune system process;GO:0050794//regulation of cellular process;GO:0043412//macromolecule modification;GO:0050789//regulation of biological process;GO:0006464//cellu…
ENSG00000172183	27.7833	41.7	0.585828	2.66311e-05	0.0214167	yes	ISG20	interferon stimulated exonuclease gene 20 [Source:HGNC Symbol;Acc:HGNC:6130]	-	-	-	-	GO:0043226//organelle;GO:0031974//membrane-enclosed lumen;GO:0005634//nucleus;GO:0070013//intracellular organelle lumen;GO:0005654//nucleoplasm;GO:0044446//intracellular organelle part;GO:0043232//intracellular non-membrane-bounded organelle;GO:0044422//organelle part;GO:0005623//cell;GO:0005730//nucleolus;GO:0005737//cytoplasm;GO:0043227//membrane-bounded organelle;GO:0044424//intracellular part…	GO:0003674//molecular_function;GO:0005488//binding;GO:0043167//ion binding;GO:0003723//RNA binding;GO:0097159//organic cyclic compound binding;GO:1901363//heterocyclic compound binding;GO:0003676//nucleic acid binding;GO:0004518//nuclease activity;GO:0016787//hydrolase activity;GO:0003824//catalytic activity;GO:0016788//hydrolase activity, acting on ester bonds	GO:0050794//regulation of cellular process;GO:0044085//cellular component biogenesis;GO:0051716//cellular response to stimulus;GO:0002376//immune system process;GO:0044699//single-organism process;GO:0006807//nitrogen compound metabolic process;GO:1901360//organic cyclic compound metabolic process;GO:0009987//cellular process;GO:0044419//interspecies interaction between organisms;GO:0044403//symb…
ENSG00000136051	6.87667	10.4167	0.599112	3.84792e-05	0.0274663	yes	KIAA1033	KIAA1033 [Source:HGNC Symbol;Acc:HGNC:29174]	-	-	-	-	GO:0044422//organelle part;GO:0044446//intracellular organelle part;GO:0070013//intracellular organelle lumen;GO:0043229//intracellular organelle;GO:0044428//nuclear part;GO:0044444//cytoplasmic part;GO:0005575//cellular_component;GO:0044424//intracellular part;GO:0005737//cytoplasm;GO:0005623//cell;GO:0031981//nuclear lumen;GO:0043233//organelle lumen;GO:0012505//endomembrane system;GO:0044464//…	-	GO:0044765//single-organism transport;GO:1902582//single-organism intracellular transport;GO:0044699//single-organism process;GO:1902578//single-organism localization;GO:0046907//intracellular transport;GO:0051179//localization;GO:0051234//establishment of localization;GO:0008150//biological_process;GO:0007034//vacuolar transport;GO:0006810//transport;GO:0051649//establishment of localization in …
ENSG00000002549	58.2567	89.0233	0.61176	0.00013921	0.0571188	yes	LAP3	leucine aminopeptidase 3 [Source:HGNC Symbol;Acc:HGNC:18449]	Metabolism	Metabolism of other amino acids;Amino acid metabolism	ko00480//Glutathione metabolism;ko00330//Arginine and proline metabolism	K11142	GO:0070013//intracellular organelle lumen;GO:0043233//organelle lumen;GO:0043227//membrane-bounded organelle;GO:0005739//mitochondrion;GO:0031981//nuclear lumen;GO:0005623//cell;GO:0005794//Golgi apparatus;GO:0044464//cell part;GO:0012505//endomembrane system;GO:0043226//organelle;GO:0005654//nucleoplasm;GO:0044428//nuclear part;GO:0044446//intracellular organelle part;GO:0044422//organelle part;…	GO:0016787//hydrolase activity;GO:0003674//molecular_function;GO:0043167//ion binding;GO:0008233//peptidase activity;GO:0003824//catalytic activity;GO:0005488//binding	GO:0008150//biological_process
ENSG00000135363	0.0733333	0.47	2.68012	7.35174e-05	0.0369517	yes	LMO2	LIM domain only 2 [Source:HGNC Symbol;Acc:HGNC:6642]	Human Diseases	Cancers	ko05202//Transcriptional misregulation in cancers	K15612	GO:0005623//cell;GO:0032991//macromolecular complex;GO:0043227//membrane-bounded organelle;GO:0005575//cellular_component;GO:0043229//intracellular organelle;GO:0043234//protein complex;GO:0043231//intracellular membrane-bounded organelle;GO:0044424//intracellular part;GO:0043226//organelle;GO:0005634//nucleus;GO:0044464//cell part;GO:0005622//intracellular	GO:0005515//protein binding;GO:0003674//molecular_function;GO:0003677//DNA binding;GO:0008134//transcription factor binding;GO:0003676//nucleic acid binding;GO:0000988//transcription factor activity, protein binding;GO:0043167//ion binding;GO:0097159//organic cyclic compound binding;GO:1901363//heterocyclic compound binding;GO:0001071//nucleic acid binding transcription factor activity;GO:0005488…	GO:0048856//anatomical structure development;GO:0032502//developmental process;GO:0008152//metabolic process;GO:0009058//biosynthetic process;GO:0006807//nitrogen compound metabolic process;GO:0008150//biological_process;GO:0044237//cellular metabolic process;GO:0034641//cellular nitrogen compound metabolic process;GO:0009987//cellular process
ENSG00000168404	12.82	19.3333	0.592694	0.000488645	0.134578	yes	MLKL	mixed lineage kinase domain like [Source:HGNC Symbol;Acc:HGNC:26617]	Environmental Information Processing	Signal transduction	ko04668//TNF signaling pathway	K08849	GO:0005886//plasma membrane;GO:0044444//cytoplasmic part;GO:0005622//intracellular;GO:0005737//cytoplasm;GO:0044424//intracellular part;GO:0005623//cell;GO:0005575//cellular_component;GO:0005829//cytosol;GO:0071944//cell periphery;GO:0044464//cell part;GO:0016020//membrane	GO:0003674//molecular_function;GO:0019899//enzyme binding;GO:0005488//binding;GO:0005515//protein binding	GO:0008219//cell death;GO:0009987//cellular process;GO:0016265//death;GO:0008150//biological_process;GO:0044699//single-organism process;GO:0019538//protein metabolic process;GO:0006464//cellular protein modification process;GO:0071822//protein complex subunit organization;GO:0006461//protein complex assembly;GO:0065003//macromolecular complex assembly;GO:0044260//cellular macromolecule metabolic…
ENSG00000183486	26.34	58.0067	1.13896	5.30354e-05	0.0301872	yes	MX2	MX dynamin like GTPase 2 [Source:HGNC Symbol;Acc:HGNC:7533]	-	-	-	-	GO:0031975//envelope;GO:0005623//cell;GO:0044422//organelle part;GO:0005829//cytosol;GO:0012505//endomembrane system;GO:0044444//cytoplasmic part;GO:0043234//protein complex;GO:0043229//intracellular organelle;GO:0043226//organelle;GO:0044428//nuclear part;GO:0005575//cellular_component;GO:0043231//intracellular membrane-bounded organelle;GO:0005635//nuclear envelope;GO:0044424//intracellular par…	GO:0003824//catalytic activity;GO:0016787//hydrolase activity;GO:0003674//molecular_function;GO:0016818//hydrolase activity, acting on acid anhydrides, in phosphorus-containing anhydrides;GO:0016817//hydrolase activity, acting on acid anhydrides;GO:0017111//nucleoside-triphosphatase activity;GO:0016462//pyrophosphatase activity;GO:0003924//GTPase activity	GO:0008150//biological_process;GO:0009987//cellular process;GO:0051234//establishment of localization;GO:0050794//regulation of cellular process;GO:0023052//signaling;GO:0046907//intracellular transport;GO:0007165//signal transduction;GO:0044419//interspecies interaction between organisms;GO:0065007//biological regulation;GO:0050789//regulation of biological process;GO:0044403//symbiosis, encompa…
ENSG00000007171	0.05	0.246667	2.30256	0.00039532	0.113542	yes	NOS2	nitric oxide synthase 2 [Source:HGNC Symbol;Acc:HGNC:7873]	Cellular Processes;Human Diseases;Environmental Information Processing;Metabolism	Signal transduction;Transport and catabolism;Amino acid metabolism;Infectious diseases;Cancers	ko05200//Pathways in cancer;ko05152//Tuberculosis;ko05145//Toxoplasmosis;ko04020//Calcium signaling pathway;ko05140//Leishmaniasis;ko05142//Chagas disease (American trypanosomiasis);ko05146//Amoebiasis;ko04066//HIF-1 signaling pathway;ko05132//Salmonella infection;ko05222//Small cell lung cancer;ko05133//Pertussis;ko04146//Peroxisome;ko00330//Arginine and proline metabolism;ko00220//Arginine bios…	K13241	GO:0005634//nucleus;GO:0043229//intracellular organelle;GO:0005829//cytosol;GO:0005737//cytoplasm;GO:0042579//microbody;GO:0005575//cellular_component;GO:0005622//intracellular;GO:0043226//organelle;GO:0005856//cytoskeleton;GO:0043228//non-membrane-bounded organelle;GO:0044424//intracellular part;GO:0044464//cell part;GO:0043232//intracellular non-membrane-bounded organelle;GO:0044444//cytoplasmi…	GO:0003824//catalytic activity;GO:0016491//oxidoreductase activity;GO:0003674//molecular_function;GO:0043167//ion binding;GO:0005488//binding	GO:0007165//signal transduction;GO:0050794//regulation of cellular process;GO:0006950//response to stress;GO:0008152//metabolic process;GO:0044237//cellular metabolic process;GO:0044238//primary metabolic process;GO:0050789//regulation of biological process;GO:0002376//immune system process;GO:0006807//nitrogen compound metabolic process;GO:0044699//single-organism process;GO:0044700//single orga…
ENSG00000268173	0.001	0.176667	7.46489	0.000953739	0.186164	yes	AC007192.4	Phosphatidylinositol 3-kinase regulatory subunit beta [Source:UniProtKB/Swiss-Prot;Acc:O00459]	-	-	-	-	GO:0043234//protein complex;GO:0005575//cellular_component;GO:0005829//cytosol;GO:0032991//macromolecular complex;GO:0044444//cytoplasmic part;GO:0005737//cytoplasm;GO:0043229//intracellular organelle;GO:0043231//intracellular membrane-bounded organelle;GO:0043226//organelle;GO:0044424//intracellular part;GO:0043227//membrane-bounded organelle;GO:0005634//nucleus;GO:0044464//cell part;GO:0005622/…	GO:0016301//kinase activity;GO:0003824//catalytic activity;GO:0003674//molecular_function;GO:0005488//binding;GO:0030234//enzyme regulator activity;GO:0005515//protein binding;GO:0098772//molecular function regulator;GO:0019899//enzyme binding;GO:0016772//transferase activity, transferring phosphorus-containing groups;GO:0016740//transferase activity	GO:0050794//regulation of cellular process;GO:0050789//regulation of biological process;GO:0051674//localization of cell;GO:0051169//nuclear transport;GO:0006913//nucleocytoplasmic transport;GO:0006629//lipid metabolic process;GO:0006928//movement of cell or subcellular component;GO:0034613//cellular protein localization;GO:0050896//response to stimulus;GO:0006914//autophagy;GO:0002376//immune sy…
ENSG00000105559	2.97	6.36333	1.09932	7.0921e-05	0.0369517	yes	PLEKHA4	pleckstrin homology domain containing A4 [Source:HGNC Symbol;Acc:HGNC:14339]	-	-	-	-	GO:0005623//cell;GO:0005622//intracellular;GO:0005575//cellular_component;GO:0044424//intracellular part;GO:0044464//cell part;GO:0005737//cytoplasm	GO:0005488//binding;GO:0008289//lipid binding;GO:0003674//molecular_function	GO:0008150//biological_process
ENSG00000178685	56.7333	97.3133	0.778441	7.31224e-05	0.0369517	yes	PARP10	poly(ADP-ribose) polymerase family member 10 [Source:HGNC Symbol;Acc:HGNC:25895]	-	-	-	-	GO:0043226//organelle;GO:0043229//intracellular organelle;GO:0012505//endomembrane system;GO:0043228//non-membrane-bounded organelle;GO:0043232//intracellular non-membrane-bounded organelle;GO:0005730//nucleolus;GO:0005623//cell;GO:0031974//membrane-enclosed lumen;GO:0005737//cytoplasm;GO:0043231//intracellular membrane-bounded organelle;GO:0005622//intracellular;GO:0005634//nucleus;GO:0043233//o…	GO:0032182//ubiquitin-like protein binding;GO:0016757//transferase activity, transferring glycosyl groups;GO:0003824//catalytic activity;GO:0016740//transferase activity;GO:0005488//binding;GO:0005515//protein binding;GO:0003674//molecular_function	GO:0070727//cellular macromolecule localization;GO:1902578//single-organism localization;GO:0071704//organic substance metabolic process;GO:0036211//protein modification process;GO:1902582//single-organism intracellular transport;GO:0051234//establishment of localization;GO:0034641//cellular nitrogen compound metabolic process;GO:0071702//organic substance transport;GO:0033036//macromolecule loca…
ENSG00000059378	42.92	70.44	0.714745	0.000694315	0.164408	yes	PARP12	poly(ADP-ribose) polymerase family member 12 [Source:HGNC Symbol;Acc:HGNC:21919]	-	-	-	-	GO:0043227//membrane-bounded organelle;GO:0044464//cell part;GO:0005623//cell;GO:0043229//intracellular organelle;GO:0043226//organelle;GO:0005622//intracellular;GO:0005575//cellular_component;GO:0043231//intracellular membrane-bounded organelle;GO:0044424//intracellular part;GO:0005634//nucleus	GO:0003723//RNA binding;GO:0097159//organic cyclic compound binding;GO:0043167//ion binding;GO:0016740//transferase activity;GO:0003676//nucleic acid binding;GO:1901363//heterocyclic compound binding;GO:0003824//catalytic activity;GO:0016757//transferase activity, transferring glycosyl groups;GO:0005488//binding;GO:0003674//molecular_function	-
ENSG00000173193	11.57	19.3233	0.739955	3.56013e-05	0.0265098	yes	PARP14	poly(ADP-ribose) polymerase family member 14 [Source:HGNC Symbol;Acc:HGNC:29232]	-	-	-	-	GO:0005622//intracellular;GO:0043231//intracellular membrane-bounded organelle;GO:0043229//intracellular organelle;GO:0005737//cytoplasm;GO:0043227//membrane-bounded organelle;GO:0044424//intracellular part;GO:0005575//cellular_component;GO:0005623//cell;GO:0005634//nucleus;GO:0044464//cell part;GO:0043226//organelle	GO:0003674//molecular_function;GO:0003824//catalytic activity;GO:0016740//transferase activity;GO:0016757//transferase activity, transferring glycosyl groups	GO:0034641//cellular nitrogen compound metabolic process;GO:0008152//metabolic process;GO:0044237//cellular metabolic process;GO:0009987//cellular process;GO:0006807//nitrogen compound metabolic process;GO:0008150//biological_process;GO:0009058//biosynthetic process
ENSG00000138035	33.08	49.95	0.594525	0.00077221	0.166938	yes	PNPT1	polyribonucleotide nucleotidyltransferase 1 [Source:HGNC Symbol;Acc:HGNC:23166]	Metabolism;Genetic Information Processing	Nucleotide metabolism;Folding, sorting and degradation	ko00230//Purine metabolism;ko00240//Pyrimidine metabolism;ko03018//RNA degradation	K00962	GO:0043234//protein complex;GO:0044444//cytoplasmic part;GO:0005737//cytoplasm;GO:0043227//membrane-bounded organelle;GO:0032991//macromolecular complex;GO:0044424//intracellular part;GO:0005623//cell;GO:0043226//organelle;GO:0043229//intracellular organelle;GO:0043231//intracellular membrane-bounded organelle;GO:0005622//intracellular;GO:0005739//mitochondrion;GO:0044464//cell part;GO:0005575//c…	GO:1901363//heterocyclic compound binding;GO:0016787//hydrolase activity;GO:0003674//molecular_function;GO:0016779//nucleotidyltransferase activity;GO:0003676//nucleic acid binding;GO:0004518//nuclease activity;GO:0016772//transferase activity, transferring phosphorus-containing groups;GO:0003824//catalytic activity;GO:0016740//transferase activity;GO:0005488//binding;GO:0016788//hydrolase activi…	GO:0007568//aging;GO:0071822//protein complex subunit organization;GO:0044238//primary metabolic process;GO:0043933//macromolecular complex subunit organization;GO:0007005//mitochondrion organization;GO:0008152//metabolic process;GO:0065003//macromolecular complex assembly;GO:0071840//cellular component organization or biogenesis;GO:0034641//cellular nitrogen compound metabolic process;GO:0006996…
ENSG00000240065	39.1367	60.8767	0.637368	0.000167694	0.0629451	yes	PSMB9	proteasome subunit beta 9 [Source:HGNC Symbol;Acc:HGNC:9546]	Genetic Information Processing	Folding, sorting and degradation	ko03050//Proteasome	K02741	GO:0005634//nucleus;GO:0043231//intracellular membrane-bounded organelle;GO:0043229//intracellular organelle;GO:0043226//organelle;GO:0005654//nucleoplasm;GO:0031974//membrane-enclosed lumen;GO:0005737//cytoplasm;GO:0031981//nuclear lumen;GO:0005575//cellular_component;GO:0005623//cell;GO:0044424//intracellular part;GO:0070013//intracellular organelle lumen;GO:0043227//membrane-bounded organelle;…	GO:0008233//peptidase activity;GO:0016787//hydrolase activity;GO:0003674//molecular_function;GO:0003824//catalytic activity	GO:0006807//nitrogen compound metabolic process;GO:0008150//biological_process;GO:0006082//organic acid metabolic process;GO:1901564//organonitrogen compound metabolic process;GO:0044700//single organism signaling;GO:0044281//small molecule metabolic process;GO:0044699//single-organism process;GO:0050794//regulation of cellular process;GO:0044238//primary metabolic process;GO:0071704//organic sub…
ENSG00000101000	1.79667	3.70667	1.0448	3.01449e-05	0.0233101	yes	PROCR	protein C receptor [Source:HGNC Symbol;Acc:HGNC:9452]	Organismal Systems	Immune system	ko04610//Complement and coagulation cascades	K06557	GO:0016020//membrane;GO:0043226//organelle;GO:0005622//intracellular;GO:0005815//microtubule organizing center;GO:0015630//microtubule cytoskeleton;GO:0044422//organelle part;GO:0005856//cytoskeleton;GO:0044430//cytoskeletal part;GO:0071944//cell periphery;GO:0044464//cell part;GO:0044424//intracellular part;GO:0043228//non-membrane-bounded organelle;GO:0005886//plasma membrane;GO:0005575//cellul…	GO:0003674//molecular_function	GO:0050896//response to stimulus;GO:0044699//single-organism process;GO:0040011//locomotion;GO:0008150//biological_process;GO:0051674//localization of cell;GO:0048870//cell motility;GO:0009987//cellular process;GO:0006950//response to stress;GO:0051179//localization;GO:0006928//movement of cell or subcellular component;GO:0002376//immune system process;GO:0044763//single-organism cellular process
ENSG00000105287	11.1833	19.7467	0.820259	6.47574e-05	0.0351878	yes	PRKD2	protein kinase D2 [Source:HGNC Symbol;Acc:HGNC:17293]	Organismal Systems;Environmental Information Processing	Signal transduction;Endocrine system	ko04015//Rap1 signaling pathway;ko04925//Aldosterone synthesis and secretion	K06070	GO:0005737//cytoplasm;GO:0043227//membrane-bounded organelle;GO:0031974//membrane-enclosed lumen;GO:0005634//nucleus;GO:0044446//intracellular organelle part;GO:0016020//membrane;GO:0043229//intracellular organelle;GO:0043226//organelle;GO:0044422//organelle part;GO:0070013//intracellular organelle lumen;GO:0044444//cytoplasmic part;GO:0005623//cell;GO:0005794//Golgi apparatus;GO:0005622//intrace…	GO:0016301//kinase activity;GO:0043167//ion binding;GO:0005488//binding;GO:0016740//transferase activity;GO:0003674//molecular_function;GO:0003824//catalytic activity;GO:0016772//transferase activity, transferring phosphorus-containing groups	GO:1901360//organic cyclic compound metabolic process;GO:0016043//cellular component organization;GO:0044699//single-organism process;GO:0006807//nitrogen compound metabolic process;GO:0036211//protein modification process;GO:0007154//cell communication;GO:0046483//heterocycle metabolic process;GO:0009653//anatomical structure morphogenesis;GO:0050789//regulation of biological process;GO:0044700/…
ENSG00000101347	13.67	23.8833	0.804991	4.87338e-05	0.0301872	yes	SAMHD1	SAM and HD domain containing deoxynucleoside triphosphate triphosphohydrolase 1 [Source:HGNC Symbol;Acc:HGNC:15925]	-	-	-	-	GO:0031981//nuclear lumen;GO:0005886//plasma membrane;GO:0070013//intracellular organelle lumen;GO:0016020//membrane;GO:0043227//membrane-bounded organelle;GO:0044424//intracellular part;GO:0043226//organelle;GO:0005622//intracellular;GO:0005575//cellular_component;GO:0031974//membrane-enclosed lumen;GO:0044464//cell part;GO:0005654//nucleoplasm;GO:0005634//nucleus;GO:0071944//cell periphery;GO:0…	GO:0003723//RNA binding;GO:0003676//nucleic acid binding;GO:0005488//binding;GO:1901363//heterocyclic compound binding;GO:0003674//molecular_function;GO:0043167//ion binding;GO:0097159//organic cyclic compound binding	GO:0002376//immune system process;GO:0051716//cellular response to stimulus;GO:0044281//small molecule metabolic process;GO:0046483//heterocycle metabolic process;GO:0065003//macromolecular complex assembly;GO:0044699//single-organism process;GO:0008152//metabolic process;GO:0044763//single-organism cellular process;GO:1901575//organic substance catabolic process;GO:0050896//response to stimulus;…
ENSG00000141574	30.22	49.3867	0.708618	8.1798e-09	8.22275e-05	yes	SECTM1	secreted and transmembrane 1 [Source:HGNC Symbol;Acc:HGNC:10707]	-	-	-	-	GO:0044421//extracellular region part;GO:0005622//intracellular;GO:0043226//organelle;GO:0005575//cellular_component;GO:0071944//cell periphery;GO:0005794//Golgi apparatus;GO:0005576//extracellular region;GO:0005615//extracellular space;GO:0005623//cell;GO:0044444//cytoplasmic part;GO:0044424//intracellular part;GO:0043227//membrane-bounded organelle;GO:0044464//cell part;GO:0005737//cytoplasm;GO…	GO:0003674//molecular_function;GO:0004871//signal transducer activity	GO:0044700//single organism signaling;GO:0051716//cellular response to stimulus;GO:0009987//cellular process;GO:0050896//response to stimulus;GO:0048856//anatomical structure development;GO:0007165//signal transduction;GO:0050789//regulation of biological process;GO:0023052//signaling;GO:0050794//regulation of cellular process;GO:0032502//developmental process;GO:0007154//cell communication;GO:00…
ENSG00000115415	162.277	250.417	0.625875	0.000518522	0.13717	yes	STAT1	signal transducer and activator of transcription 1 [Source:HGNC Symbol;Acc:HGNC:11362]	Organismal Systems;Environmental Information Processing;Human Diseases	Endocrine system;Immune system;Cancers;Development;Immune diseases;Endocrine and metabolic diseases;Infectious diseases;Signal transduction	ko05200//Pathways in cancer;ko05168//Herpes simplex infection;ko05164//Influenza A;ko05152//Tuberculosis;ko04062//Chemokine signaling pathway;ko05145//Toxoplasmosis;ko04621//NOD-like receptor signaling pathway;ko04380//Osteoclast differentiation;ko04630//Jak-STAT signaling pathway;ko05161//Hepatitis B;ko05162//Measles;ko05160//Hepatitis C;ko05140//Leishmaniasis;ko04919//Thyroid hormone signaling …	K11220	GO:0043233//organelle lumen;GO:0005694//chromosome;GO:0005575//cellular_component;GO:0005829//cytosol;GO:0043229//intracellular organelle;GO:0044446//intracellular organelle part;GO:0043231//intracellular membrane-bounded organelle;GO:0070013//intracellular organelle lumen;GO:0005654//nucleoplasm;GO:0043226//organelle;GO:0044444//cytoplasmic part;GO:0031974//membrane-enclosed lumen;GO:0005622//in…	GO:0003676//nucleic acid binding;GO:0003674//molecular_function;GO:0003677//DNA binding;GO:0097159//organic cyclic compound binding;GO:1901363//heterocyclic compound binding;GO:0005515//protein binding;GO:0005488//binding;GO:0004871//signal transducer activity;GO:0019899//enzyme binding;GO:0001071//nucleic acid binding transcription factor activity	GO:0008152//metabolic process;GO:0032502//developmental process;GO:0044699//single-organism process;GO:0065008//regulation of biological quality;GO:0044237//cellular metabolic process;GO:0023052//signaling;GO:0016265//death;GO:0042592//homeostatic process;GO:0044700//single organism signaling;GO:0071840//cellular component organization or biogenesis;GO:0034641//cellular nitrogen compound metaboli…
ENSG00000170581	42.1233	74.4233	0.821135	0.000440542	0.124748	yes	STAT2	signal transducer and activator of transcription 2 [Source:HGNC Symbol;Acc:HGNC:11363]	Environmental Information Processing;Human Diseases;Organismal Systems	Immune system;Development;Infectious diseases;Signal transduction	ko05168//Herpes simplex infection;ko05164//Influenza A;ko04062//Chemokine signaling pathway;ko04621//NOD-like receptor signaling pathway;ko04380//Osteoclast differentiation;ko04630//Jak-STAT signaling pathway;ko05161//Hepatitis B;ko05162//Measles;ko05160//Hepatitis C	K11221	GO:0031974//membrane-enclosed lumen;GO:0044444//cytoplasmic part;GO:0005622//intracellular;GO:0044424//intracellular part;GO:0043233//organelle lumen;GO:0005634//nucleus;GO:0005886//plasma membrane;GO:0043231//intracellular membrane-bounded organelle;GO:0005654//nucleoplasm;GO:0070013//intracellular organelle lumen;GO:0071944//cell periphery;GO:0005575//cellular_component;GO:0043226//organelle;GO…	GO:0001071//nucleic acid binding transcription factor activity;GO:0097159//organic cyclic compound binding;GO:0005488//binding;GO:1901363//heterocyclic compound binding;GO:0003677//DNA binding;GO:0004871//signal transducer activity;GO:0003674//molecular_function;GO:0003676//nucleic acid binding	GO:0036211//protein modification process;GO:0050789//regulation of biological process;GO:0071840//cellular component organization or biogenesis;GO:0071704//organic substance metabolic process;GO:0048856//anatomical structure development;GO:0044237//cellular metabolic process;GO:0051704//multi-organism process;GO:0050794//regulation of cellular process;GO:0007005//mitochondrion organization;GO:000…
ENSG00000132207	13.7133	25.9267	0.918857	0.000173991	0.0636016	yes	SLX1A	SLX1 homolog A, structure-specific endonuclease subunit [Source:HGNC Symbol;Acc:HGNC:20922]	Genetic Information Processing	Replication and repair	ko03460//Fanconi anemia pathway	K15078	GO:0043234//protein complex;GO:0044446//intracellular organelle part;GO:0043228//non-membrane-bounded organelle;GO:0044422//organelle part;GO:0031974//membrane-enclosed lumen;GO:0043226//organelle;GO:0043232//intracellular non-membrane-bounded organelle;GO:0005622//intracellular;GO:0043227//membrane-bounded organelle;GO:0005623//cell;GO:0005654//nucleoplasm;GO:0005575//cellular_component;GO:00700…	GO:0003824//catalytic activity;GO:0004518//nuclease activity;GO:0016787//hydrolase activity;GO:0003674//molecular_function;GO:0043167//ion binding;GO:0016788//hydrolase activity, acting on ester bonds;GO:0005488//binding	GO:0046483//heterocycle metabolic process;GO:0006725//cellular aromatic compound metabolic process;GO:0065008//regulation of biological quality;GO:0006259//DNA metabolic process;GO:0034641//cellular nitrogen compound metabolic process;GO:0006996//organelle organization;GO:0009987//cellular process;GO:0065007//biological regulation;GO:0006807//nitrogen compound metabolic process;GO:0044260//cellul…
ENSG00000018280	0.0166667	0.176667	3.40599	0.000196531	0.0681251	yes	SLC11A1	solute carrier family 11 member 1 [Source:HGNC Symbol;Acc:HGNC:10907]	Organismal Systems;Cellular Processes	Transport and catabolism;Digestive system	ko04142//Lysosome;ko04978//Mineral absorption	K12347	GO:0043231//intracellular membrane-bounded organelle;GO:0044424//intracellular part;GO:0005623//cell;GO:0005575//cellular_component;GO:0005886//plasma membrane;GO:0016020//membrane;GO:0043227//membrane-bounded organelle;GO:0031982//vesicle;GO:0005768//endosome;GO:0044464//cell part;GO:0005764//lysosome;GO:0071944//cell periphery;GO:0000323//lytic vacuole;GO:0043226//organelle;GO:0005737//cytoplas…	GO:0005215//transporter activity;GO:0022857//transmembrane transporter activity;GO:0003674//molecular_function	GO:0044699//single-organism process;GO:0071702//organic substance transport;GO:0002376//immune system process;GO:0051234//establishment of localization;GO:0008150//biological_process;GO:0045184//establishment of protein localization;GO:0044238//primary metabolic process;GO:0006950//response to stress;GO:0006913//nucleocytoplasmic transport;GO:0044260//cellular macromolecule metabolic process;GO:0…
ENSG00000110446	4.30667	9.93	1.20522	0.000106631	0.0466048	yes	SLC15A3	solute carrier family 15 member 3 [Source:HGNC Symbol;Acc:HGNC:18068]	-	-	-	-	GO:0005773//vacuole;GO:0000323//lytic vacuole;GO:0043231//intracellular membrane-bounded organelle;GO:0044464//cell part;GO:0043227//membrane-bounded organelle;GO:0044424//intracellular part;GO:0005737//cytoplasm;GO:0005622//intracellular;GO:0043226//organelle;GO:0005575//cellular_component;GO:0005623//cell;GO:0005764//lysosome;GO:0044444//cytoplasmic part;GO:0043229//intracellular organelle	GO:0022857//transmembrane transporter activity;GO:0003674//molecular_function;GO:0005215//transporter activity	GO:0008150//biological_process;GO:0009987//cellular process;GO:0044765//single-organism transport;GO:0044763//single-organism cellular process;GO:0055085//transmembrane transport;GO:0051179//localization;GO:0044699//single-organism process;GO:0051234//establishment of localization;GO:0006810//transport;GO:1902578//single-organism localization
ENSG00000135899	6.75333	13.4967	0.998931	0.000131262	0.0558597	yes	SP110	SP110 nuclear body protein [Source:HGNC Symbol;Acc:HGNC:5401]	-	-	-	-	GO:0044464//cell part;GO:0044446//intracellular organelle part;GO:0043229//intracellular organelle;GO:0005730//nucleolus;GO:0031981//nuclear lumen;GO:0043228//non-membrane-bounded organelle;GO:0031974//membrane-enclosed lumen;GO:0043232//intracellular non-membrane-bounded organelle;GO:0043231//intracellular membrane-bounded organelle;GO:0005622//intracellular;GO:0005623//cell;GO:0044424//intracel…	GO:0043167//ion binding;GO:0003677//DNA binding;GO:0003674//molecular_function;GO:0003676//nucleic acid binding;GO:1901363//heterocyclic compound binding;GO:0097159//organic cyclic compound binding;GO:0005488//binding;GO:0004871//signal transducer activity	GO:0044403//symbiosis, encompassing mutualism through parasitism;GO:0007154//cell communication;GO:0044237//cellular metabolic process;GO:0009987//cellular process;GO:0007165//signal transduction;GO:0006807//nitrogen compound metabolic process;GO:0008152//metabolic process;GO:0051704//multi-organism process;GO:0044419//interspecies interaction between organisms;GO:0050896//response to stimulus;GO…
ENSG00000205413	6.31	11.78	0.900628	8.75905e-07	0.00177233	yes	SAMD9	sterile alpha motif domain containing 9 [Source:HGNC Symbol;Acc:HGNC:1348]	-	-	-	-	GO:0043226//organelle;GO:0005737//cytoplasm;GO:0005575//cellular_component;GO:0044464//cell part;GO:0005623//cell;GO:0005622//intracellular;GO:0044424//intracellular part	GO:0003674//molecular_function	-
ENSG00000168016	8.99	21.1033	1.23108	0.000514432	0.13717	yes	TRANK1	tetratricopeptide repeat and ankyrin repeat containing 1 [Source:HGNC Symbol;Acc:HGNC:29011]	-	-	-	-	-	GO:0003674//molecular_function	-
ENSG00000168394	116.15	180.593	0.636755	1.54525e-05	0.0141215	yes	TAP1	transporter 1, ATP binding cassette subfamily B member [Source:HGNC Symbol;Acc:HGNC:43]	Environmental Information Processing;Human Diseases;Cellular Processes;Organismal Systems	Infectious diseases;Membrane transport;Immune system;Immune diseases;Transport and catabolism	ko05168//Herpes simplex infection;ko04612//Antigen processing and presentation;ko04145//Phagosome;ko02010//ABC transporters;ko05340//Primary immunodeficiency	K05653	GO:0044424//intracellular part;GO:0005783//endoplasmic reticulum;GO:0043229//intracellular organelle;GO:0005622//intracellular;GO:0044444//cytoplasmic part;GO:0032991//macromolecular complex;GO:0043227//membrane-bounded organelle;GO:0043234//protein complex;GO:0005737//cytoplasm;GO:0005623//cell;GO:0005576//extracellular region;GO:0012505//endomembrane system;GO:0005739//mitochondrion;GO:0044464/…	GO:0016462//pyrophosphatase activity;GO:0016787//hydrolase activity;GO:0005215//transporter activity;GO:0022857//transmembrane transporter activity;GO:0016818//hydrolase activity, acting on acid anhydrides, in phosphorus-containing anhydrides;GO:0017111//nucleoside-triphosphatase activity;GO:0016817//hydrolase activity, acting on acid anhydrides;GO:0016887//ATPase activity;GO:0003824//catalytic a…	GO:0009987//cellular process;GO:0002376//immune system process;GO:0055085//transmembrane transport;GO:0042592//homeostatic process;GO:0008150//biological_process;GO:0006950//response to stress;GO:0044403//symbiosis, encompassing mutualism through parasitism;GO:0044419//interspecies interaction between organisms;GO:0051234//establishment of localization;GO:1902578//single-organism localization;GO:…
ENSG00000106785	34.6533	52.7867	0.607179	5.19529e-05	0.0301872	yes	TRIM14	tripartite motif containing 14 [Source:HGNC Symbol;Acc:HGNC:16283]	-	-	-	-	GO:0005575//cellular_component;GO:0044464//cell part;GO:0005622//intracellular;GO:0005623//cell	GO:0005488//binding;GO:0043167//ion binding;GO:0003674//molecular_function	GO:0006807//nitrogen compound metabolic process;GO:0009987//cellular process;GO:0044419//interspecies interaction between organisms;GO:0050896//response to stimulus;GO:0044237//cellular metabolic process;GO:0044403//symbiosis, encompassing mutualism through parasitism;GO:0051704//multi-organism process;GO:0002376//immune system process;GO:0009058//biosynthetic process;GO:0006950//response to stre…
ENSG00000132274	5.48333	12.99	1.24428	9.89335e-05	0.0442013	yes	TRIM22	tripartite motif containing 22 [Source:HGNC Symbol;Acc:HGNC:16379]	-	-	-	-	GO:0005622//intracellular;GO:0005634//nucleus;GO:0044424//intracellular part;GO:0043227//membrane-bounded organelle;GO:0043226//organelle;GO:0044464//cell part;GO:0005654//nucleoplasm;GO:0005575//cellular_component;GO:0070013//intracellular organelle lumen;GO:0044444//cytoplasmic part;GO:0043229//intracellular organelle;GO:0044428//nuclear part;GO:0031974//membrane-enclosed lumen;GO:0044422//orga…	GO:0019899//enzyme binding;GO:0005488//binding;GO:0060090//binding, bridging;GO:0043167//ion binding;GO:0005515//protein binding;GO:0030674//protein binding, bridging;GO:0003674//molecular_function;GO:0001071//nucleic acid binding transcription factor activity;GO:0003824//catalytic activity;GO:0000988//transcription factor activity, protein binding;GO:0016874//ligase activity	GO:0008150//biological_process;GO:0044237//cellular metabolic process;GO:0009058//biosynthetic process;GO:0043933//macromolecular complex subunit organization;GO:0043170//macromolecule metabolic process;GO:0071704//organic substance metabolic process;GO:0006807//nitrogen compound metabolic process;GO:0044419//interspecies interaction between organisms;GO:0036211//protein modification process;GO:0…
ENSG00000132256	6.29	10.4067	0.726376	0.000695084	0.164408	yes	TRIM5	tripartite motif containing 5 [Source:HGNC Symbol;Acc:HGNC:16276]	-	-	-	-	GO:0005575//cellular_component;GO:0005737//cytoplasm;GO:0044464//cell part;GO:0005634//nucleus;GO:0043226//organelle;GO:0044444//cytoplasmic part;GO:0005829//cytosol;GO:0043231//intracellular membrane-bounded organelle;GO:0005622//intracellular;GO:0043227//membrane-bounded organelle;GO:0005623//cell;GO:0044424//intracellular part;GO:0043229//intracellular organelle	GO:0003824//catalytic activity;GO:0030674//protein binding, bridging;GO:0004871//signal transducer activity;GO:0043167//ion binding;GO:0060090//binding, bridging;GO:0003674//molecular_function;GO:0005515//protein binding;GO:0005488//binding;GO:0016874//ligase activity;GO:0019899//enzyme binding	GO:0002376//immune system process;GO:0006950//response to stress;GO:0051716//cellular response to stimulus;GO:0044699//single-organism process;GO:0051704//multi-organism process;GO:0044419//interspecies interaction between organisms;GO:0019538//protein metabolic process;GO:0044267//cellular protein metabolic process;GO:0009058//biosynthetic process;GO:0008152//metabolic process;GO:0008150//biolog…
ENSG00000185880	26.18	43.85	0.744112	0.000850433	0.176268	yes	TRIM69	tripartite motif containing 69 [Source:HGNC Symbol;Acc:HGNC:17857]	-	-	-	-	GO:0005829//cytosol;GO:0043226//organelle;GO:0071944//cell periphery;GO:0044424//intracellular part;GO:0070013//intracellular organelle lumen;GO:0043229//intracellular organelle;GO:0005886//plasma membrane;GO:0044428//nuclear part;GO:0005737//cytoplasm;GO:0005623//cell;GO:0016020//membrane;GO:0031974//membrane-enclosed lumen;GO:0044444//cytoplasmic part;GO:0043227//membrane-bounded organelle;GO:0…	GO:0003674//molecular_function;GO:0043167//ion binding;GO:0005488//binding;GO:0016874//ligase activity;GO:0003824//catalytic activity	GO:0044267//cellular protein metabolic process;GO:0008152//metabolic process;GO:0016265//death;GO:0044237//cellular metabolic process;GO:0044260//cellular macromolecule metabolic process;GO:0008150//biological_process;GO:0044699//single-organism process;GO:0036211//protein modification process;GO:0019538//protein metabolic process;GO:0006464//cellular protein modification process;GO:0043412//macr…
ENSG00000121858	5.01667	8.72	0.797599	0.000472963	0.132068	yes	TNFSF10	tumor necrosis factor superfamily member 10 [Source:HGNC Symbol;Acc:HGNC:11925]	Organismal Systems;Human Diseases;Environmental Information Processing;Cellular Processes	Signal transduction;Signaling molecules and interaction;Infectious diseases;Cell growth and death;Immune system	ko04060//Cytokine-cytokine receptor interaction;ko04650//Natural killer cell mediated cytotoxicity;ko05164//Influenza A;ko05162//Measles;ko04210//Apoptosis;ko04068//FoxO signaling pathway	K04721	GO:0044464//cell part;GO:0005623//cell;GO:0016020//membrane;GO:0005576//extracellular region;GO:0005615//extracellular space;GO:0043226//organelle;GO:0044421//extracellular region part;GO:0005886//plasma membrane;GO:0071944//cell periphery;GO:0005575//cellular_component	GO:0043167//ion binding;GO:0003674//molecular_function;GO:0005488//binding	GO:0044700//single organism signaling;GO:0023052//signaling;GO:0065007//biological regulation;GO:0007154//cell communication;GO:0007005//mitochondrion organization;GO:0050896//response to stimulus;GO:0016043//cellular component organization;GO:0050794//regulation of cellular process;GO:0008219//cell death;GO:0044763//single-organism cellular process;GO:0032502//developmental process;GO:0051716//c…
ENSG00000156587	4.29667	10.3967	1.27483	5.40612e-06	0.00639353	yes	UBE2L6	ubiquitin conjugating enzyme E2 L6 [Source:HGNC Symbol;Acc:HGNC:12490]	Genetic Information Processing;Human Diseases	Neurodegenerative diseases;Folding, sorting and degradation	ko04120//Ubiquitin mediated proteolysis;ko05012//Parkinson's disease	K04553	GO:0005575//cellular_component;GO:0043229//intracellular organelle;GO:0044464//cell part;GO:0005829//cytosol;GO:0044446//intracellular organelle part;GO:0043233//organelle lumen;GO:0005622//intracellular;GO:0043226//organelle;GO:0043231//intracellular membrane-bounded organelle;GO:0044428//nuclear part;GO:0070013//intracellular organelle lumen;GO:0044424//intracellular part;GO:0005634//nucleus;GO…	GO:0005488//binding;GO:0005515//protein binding;GO:0003674//molecular_function;GO:0032182//ubiquitin-like protein binding	GO:0071704//organic substance metabolic process;GO:0009058//biosynthetic process;GO:0036211//protein modification process;GO:0006950//response to stress;GO:0008152//metabolic process;GO:0006725//cellular aromatic compound metabolic process;GO:0019538//protein metabolic process;GO:0009987//cellular process;GO:1901360//organic cyclic compound metabolic process;GO:0044267//cellular protein metabolic…
ENSG00000182179	2.22	7.42333	1.74151	1.78713e-06	0.00256645	yes	UBA7	ubiquitin like modifier activating enzyme 7 [Source:HGNC Symbol;Acc:HGNC:12471]	Human Diseases;Genetic Information Processing	Neurodegenerative diseases;Folding, sorting and degradation	ko04120//Ubiquitin mediated proteolysis;ko05012//Parkinson's disease	K10698	GO:0044446//intracellular organelle part;GO:0005634//nucleus;GO:0005654//nucleoplasm;GO:0031974//membrane-enclosed lumen;GO:0031981//nuclear lumen;GO:0044428//nuclear part;GO:0044464//cell part;GO:0043227//membrane-bounded organelle;GO:0005622//intracellular;GO:0005737//cytoplasm;GO:0044422//organelle part;GO:0043233//organelle lumen;GO:0043226//organelle;GO:0005575//cellular_component;GO:0043229…	GO:0016874//ligase activity;GO:0003674//molecular_function;GO:0003824//catalytic activity	GO:0046483//heterocycle metabolic process;GO:0043412//macromolecule modification;GO:0006139//nucleobase-containing compound metabolic process;GO:0006807//nitrogen compound metabolic process;GO:0008150//biological_process;GO:0071704//organic substance metabolic process;GO:0034641//cellular nitrogen compound metabolic process;GO:0006464//cellular protein modification process;GO:0044267//cellular pr…
ENSG00000132530	5.59333	11.83	1.08067	1.49889e-05	0.0141215	yes	XAF1	XIAP associated factor 1 [Source:HGNC Symbol;Acc:HGNC:30932]	-	-	-	-	GO:0005575//cellular_component;GO:0005634//nucleus;GO:0005622//intracellular;GO:0044444//cytoplasmic part;GO:0044464//cell part;GO:0005737//cytoplasm;GO:0043231//intracellular membrane-bounded organelle;GO:0043227//membrane-bounded organelle;GO:0043226//organelle;GO:0005623//cell;GO:0005739//mitochondrion;GO:0044424//intracellular part;GO:0005829//cytosol;GO:0043229//intracellular organelle	GO:0043167//ion binding;GO:0003674//molecular_function;GO:0005488//binding	GO:0044700//single organism signaling;GO:0065003//macromolecular complex assembly;GO:0007165//signal transduction;GO:0050789//regulation of biological process;GO:0044085//cellular component biogenesis;GO:0006950//response to stress;GO:0070271//protein complex biogenesis;GO:0065007//biological regulation;GO:0071822//protein complex subunit organization;GO:0044699//single-organism process;GO:002260…

## Sheet: cross 100-200
12 common elements in "CK vs 100" and "CK vs 200":
BATF2
STAT1
DDX60
LGALS9
UBA7
UBA2L6
IFI44L
STAT2
PARP14
SAMD9
TNFSF10
XAF1
